# Supplementary material for: The role of organoaluminum and electron donors in propene insertion on the Ziegler–Natta catalyst
Source: Royal Society of Chemistry journal article supplement (doi:10.1039/d4dt01097c), 2024-01-01
Supplement: d4dt01097c1.pdf [file d4dt01097c1.pdf]

## Supplementary Information

# The Role of Organoaluminum and Electron Donors in Propene Insertion on the Ziegler-Natta Catalyst

Phiphob Naweephattana,<sup>†</sup> Khanittha Walajjai,<sup>‡</sup> Chompoonut Rungnim,<sup>‡</sup> Torsak Luanphaisarnnont,<sup>†</sup>  
Anyarat Watthanaphanit,<sup>†</sup> Supanan Patthamasang,<sup>‡</sup> Phairat Phiriyawirut,<sup>‡</sup> and Panida  
Surawatanawong<sup>\*,†,‡</sup>

<sup>†</sup>*Department of Chemistry and Center of Excellence for Innovation in Chemistry, Faculty of Science, Mahidol University, Bangkok 10400, Thailand*

<sup>‡</sup>*SCG Chemicals, Co., Ltd., 1 Siam Cement Road, Bangsue, Bangkok, 10800, Thailand*

<sup>‡</sup>*National Electronics and Computer Technology Center (NECTEC), National Science and Technology Development Agency (NSTDA), Pathum Thani 12120, Thailand*

<sup>‡</sup>*Center of Sustainable Energy and Green Materials, Mahidol University, Salaya, Nakhon Pathom 73170, Thailand*

\*E-mail: [panida.sur@mahidol.ac.th](mailto:panida.sur@mahidol.ac.th)

ORCID: 0000-0002-0300-4205

### Table of contents

|                                                                                                                                                                                                                                                                                                                                                                                                                |           |
|----------------------------------------------------------------------------------------------------------------------------------------------------------------------------------------------------------------------------------------------------------------------------------------------------------------------------------------------------------------------------------------------------------------|-----------|
| <b>Fig. S1.</b> Optimized geometries of DIBP, DCPDMS, Al <sub>2</sub> Et <sub>4</sub> Cl <sub>2</sub> , and Al <sub>2</sub> Et <sub>6</sub> .                                                                                                                                                                                                                                                                  | <b>S2</b> |
| <b>Fig. S2.</b> Optimized geometries for DIBP and DCPDMS adsorptions onto (MgCl <sub>2</sub> ) <sub>13</sub> /TiCl <sub>2</sub> <sup>i</sup> Bu.                                                                                                                                                                                                                                                               | <b>S2</b> |
| <b>Fig. S3.</b> Optimized geometries for AlEt <sub>2</sub> Cl adsorption onto (MgCl <sub>2</sub> ) <sub>13</sub> /TiCl <sub>2</sub> <sup>i</sup> Bu.                                                                                                                                                                                                                                                           | <b>S2</b> |
| <b>Fig. S4.</b> Optimized geometries of <b>2Al/2ID</b> /(MgCl <sub>2</sub> ) <sub>13</sub> /TiCl <sub>2</sub> <sup>i</sup> Bu cluster <b>6</b> , <b>2Al/ID</b> /(MgCl <sub>2</sub> ) <sub>13</sub> /TiCl <sub>2</sub> <sup>i</sup> Bu cluster <b>7</b> and <b>2Al/ID/ED</b> /(MgCl <sub>2</sub> ) <sub>13</sub> /TiCl <sub>2</sub> <sup>i</sup> Bu cluster <b>8</b> .                                          | <b>S3</b> |
| <b>Fig. S5.</b> The <b>Et-ID-AlEt<sub>2</sub></b> product and the transition states for the ethyl transfer from AlEt <sub>3</sub> to DIBP on 2ID/(MgCl <sub>2</sub> ) <sub>13</sub> /TiCl <sub>2</sub> <sup>i</sup> Bu cluster <b>2</b> ( <b>TS1<sub>Al</sub></b> ) and to DIBP on 2Al/2ID/(MgCl <sub>2</sub> ) <sub>13</sub> /TiCl <sub>2</sub> <sup>i</sup> Bu cluster <b>6</b> ( <b>TS2<sub>Al</sub></b> ). | <b>S3</b> |
| <b>Fig. S6.</b> Optimized geometries of 1,2- <i>re</i> and 1,2- <i>si</i> insertion transition states. ID refers to DIBP, ED refers to DCPDMS, and Al refers to AlEt <sub>2</sub> Cl on the clusters <b>7</b> and <b>8</b> .                                                                                                                                                                                   | <b>S4</b> |
| <b>Fig. S7.</b> The reaction energies in the extraction of diisobutyl phthalate (DIBP) and dimethyl phthalate (DMP).                                                                                                                                                                                                                                                                                           | <b>S4</b> |
| <b>Table S1.</b> Absolute electronic energies (E) (in hartree) for the (MgCl <sub>2</sub> ) <sub>13</sub> /TiCl <sub>2</sub> <sup>i</sup> Bu clusters with the adsorption of DIBP, DCPDMS, AlEt <sub>2</sub> Cl.                                                                                                                                                                                               | <b>S5</b> |
| <b>Table S2.</b> Absolute electronic energies (E) (in hartree) for the intermediates and transition states in the reaction between AlEt <sub>3</sub> and DIBP on the (MgCl <sub>2</sub> ) <sub>13</sub> /TiCl <sub>2</sub> <sup>i</sup> Bu cluster.                                                                                                                                                            | <b>S5</b> |
| <b>Table S3.</b> Absolute electronic energies (E) (in hartree) for propene insertion on the (MgCl <sub>2</sub> ) <sub>13</sub> /TiCl <sub>2</sub> <sup>i</sup> Bu clusters.                                                                                                                                                                                                                                    | <b>S5</b> |
| <b>Table S4.</b> The calculated and experimental C=O frequencies (cm <sup>-1</sup> ) of phthalate.                                                                                                                                                                                                                                                                                                             | <b>S6</b> |
| <b>Table S5.</b> The difference in the buried volume between occupied and free quadrants (Δ%V <sub>Bur</sub> ) from the buried volume analysis.                                                                                                                                                                                                                                                                | <b>S6</b> |
| <b>Table S6.</b> The adsorption energies (ΔE <sub>ads</sub> in kcal/mol) of dimethyl phthalate (DMP), diisobutyl phthalate (DIBP) and AlEt <sub>2</sub> Cl on the (MgCl <sub>2</sub> ) <sub>13</sub> /TiCl <sub>2</sub> <sup>i</sup> Bu cluster.                                                                                                                                                               | <b>S7</b> |
| Cartesian coordinates of optimized geometries                                                                                                                                                                                                                                                                                                                                                                  | <b>S8</b> |

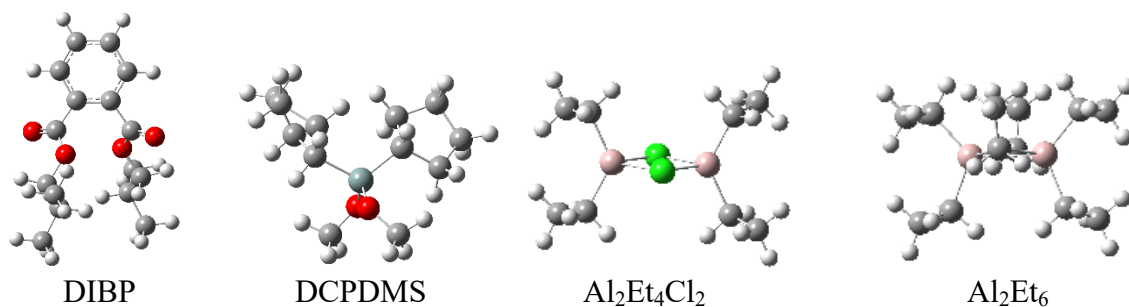

**Fig. S1.** Optimized geometries of DIBP, DCPDMS,  $\text{Al}_2\text{Et}_4\text{Cl}_2$ , and  $\text{Al}_2\text{Et}_6$ .

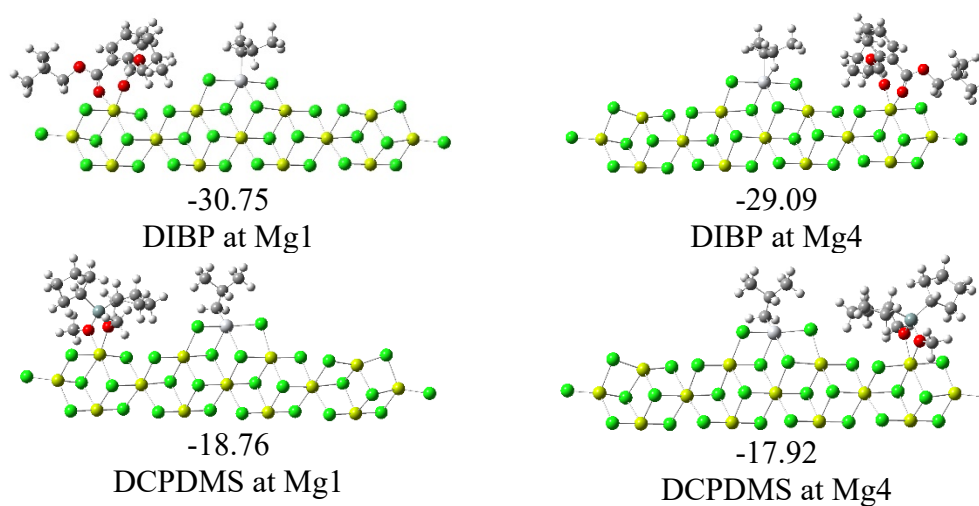

**Fig. S2.** Optimized geometries for DIBP and DCPDMS adsorptions onto  $(\text{MgCl}_2)_{13}/\text{TiCl}_2^i\text{Bu}$  at Mg1 (at the front of the growing chain) and at Mg4 (at the back of the growing chain). The adsorption energies ( $\Delta E_{\text{ads}}$ ) are shown in kcal/mol.

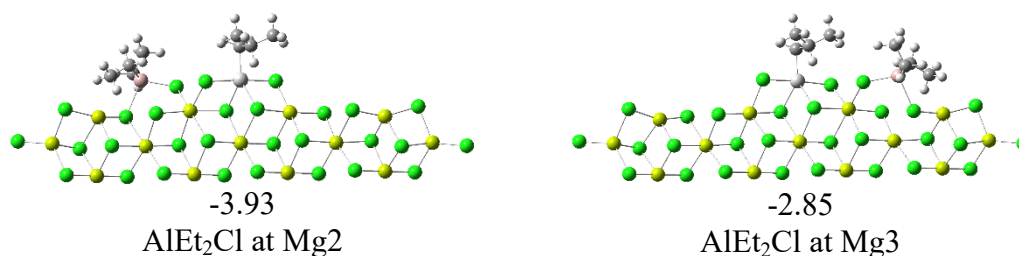

**Fig. S3.** Optimized geometries for  $\text{AlEt}_2\text{Cl}$  adsorption onto  $(\text{MgCl}_2)_{13}/\text{TiCl}_2^i\text{Bu}$  at Mg2 (at the front of the growing chain) and at Mg3 (at the back of the growing chain). The adsorption energies ( $\Delta E_{\text{ads}}$ ) are shown in kcal/mol.

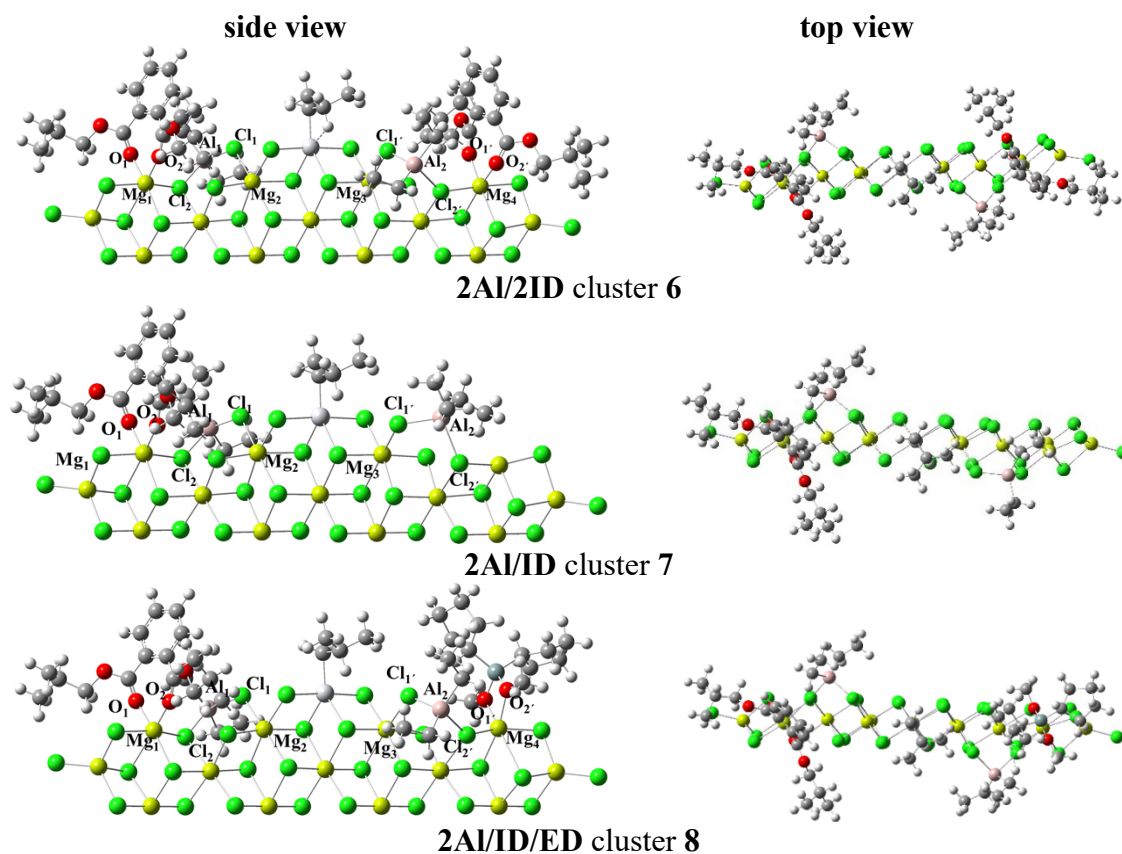

**Fig. S4.** Optimized geometries of 2Al/2ID/(MgCl<sub>2</sub>)<sub>13</sub>/TiCl<sub>2</sub><sup>i</sup>Bu cluster **6**, 2Al/ID/(MgCl<sub>2</sub>)<sub>13</sub>/TiCl<sub>2</sub><sup>i</sup>Bu cluster **7** and 2Al/ID/ED/(MgCl<sub>2</sub>)<sub>13</sub>/TiCl<sub>2</sub><sup>i</sup>Bu cluster **8**. ID refers to DIBP, ED refers to DCPDMS, and Al refers to AlEt<sub>2</sub>Cl on the clusters.

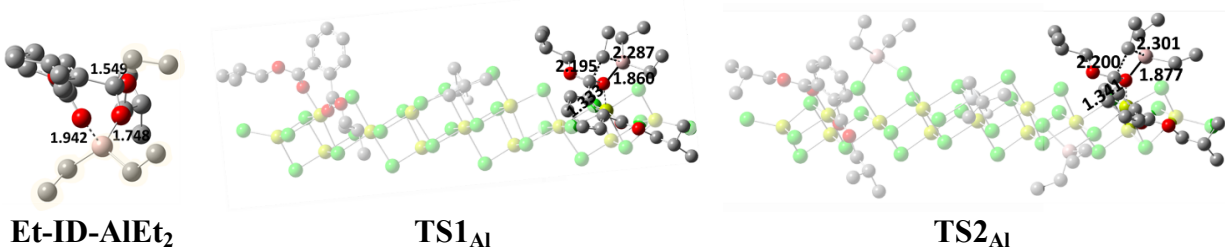

**Fig. S5.** The Et-ID-AlEt<sub>2</sub> product and the transition states for the ethyl transfer from AlEt<sub>3</sub> to DIBP on 2ID/(MgCl<sub>2</sub>)<sub>13</sub>/TiCl<sub>2</sub><sup>i</sup>Bu cluster **2** (TS1<sub>Al</sub>) and to DIBP on 2Al/2ID/(MgCl<sub>2</sub>)<sub>13</sub>/TiCl<sub>2</sub><sup>i</sup>Bu cluster **6** (TS2<sub>Al</sub>). All hydrogen atoms are omitted for clarity. The selected bond distances are shown in Å. ID refers to DIBP, ED refers to DCPDMS, and Al refers to AlEt<sub>2</sub>Cl on the clusters.

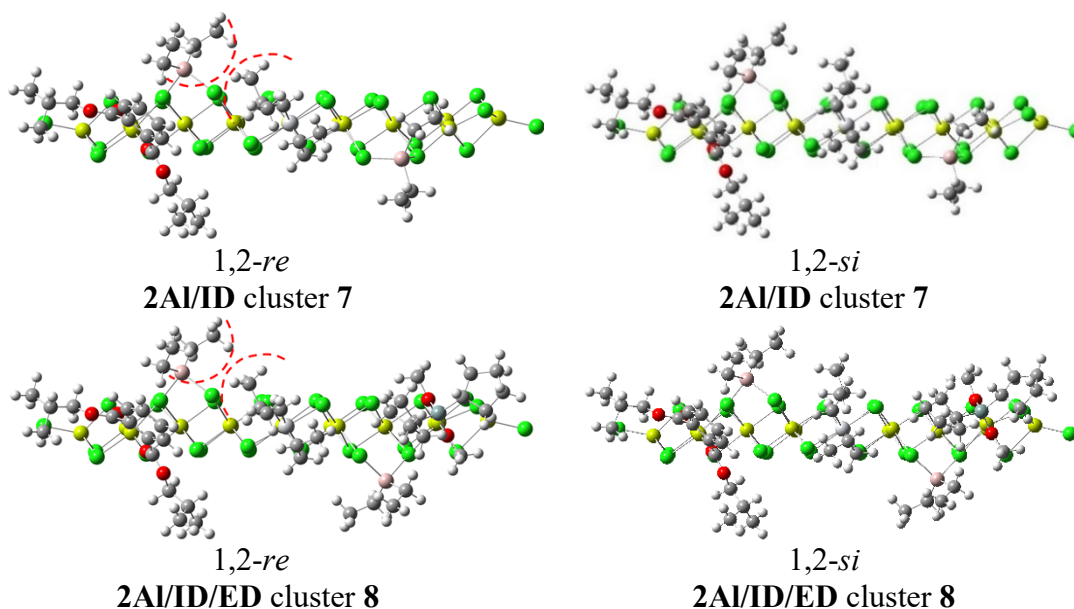

**Fig. S6.** Optimized geometries of 1,2-*re* and 1,2-*si* insertion transition states. ID refers to DIBP, ED refers to DCPDMS, and Al refers to AlEt<sub>2</sub>Cl on clusters **7** and **8**.

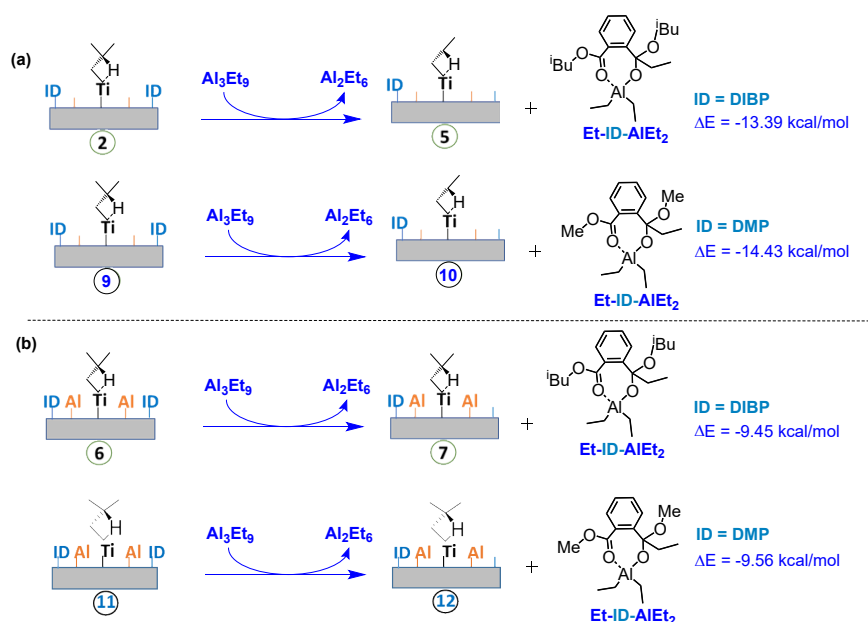

**Fig. S7** The reaction energies in the extraction of diisobutyl phthalate (DIBP) and dimethyl phthalate (DMP) (shown as ID) from (a) 2ID/(MgCl<sub>2</sub>)<sub>13</sub>/TiCl<sub>2</sub><sup>i</sup>Bu cluster **2** and **9** and from (b) 2Al/2ID/(MgCl<sub>2</sub>)<sub>13</sub>/TiCl<sub>2</sub><sup>i</sup>Bu cluster **6** and **11**. ID refers to DIBP and DMP on the clusters.

**Table S1.** Absolute electronic energies (E) (in hartree) for the  $(\text{MgCl}_2)_{13}/\text{TiCl}_2^i\text{Bu}$  clusters with the adsorption of DIBP, DCPDMS,  $\text{AlEt}_2\text{Cl}$  (referred to as Al).

|          |                                                            | E                      |                 |
|----------|------------------------------------------------------------|------------------------|-----------------|
|          |                                                            | B3LYP/BS1 <sup>a</sup> | B3LYP/def2-TZVP |
| <b>1</b> | $(\text{MgCl}_2)_{13}/\text{TiCl}_2^i\text{Bu}$            | -16492.580302          | -16497.832368   |
| <b>2</b> | 2ID/ $(\text{MgCl}_2)_{13}/\text{TiCl}_2^i\text{Bu}$       | -18341.1932            | -18346.42721    |
| <b>3</b> | 2ED/ $(\text{MgCl}_2)_{13}/\text{TiCl}_2^i\text{Bu}$       | -18316.73343           | -18321.96513    |
| <b>4</b> | 2Al/ $(\text{MgCl}_2)_{13}/\text{TiCl}_2^i\text{Bu}$       | -18214.8994            | -18220.44208    |
| <b>5</b> | ID/ $(\text{MgCl}_2)_{13}/\text{TiCl}_2^i\text{Bu}$        | -17416.88832           | -17422.13149    |
| <b>6</b> | 2Al/2ID/ $(\text{MgCl}_2)_{13}/\text{TiCl}_2^i\text{Bu}$   | -20063.52125           | -20069.04829    |
| <b>7</b> | 2Al/ID/ $(\text{MgCl}_2)_{13}/\text{TiCl}_2^i\text{Bu}$    | -19139.21079           | -19144.74628    |
| <b>8</b> | 2Al/ID/ED/ $(\text{MgCl}_2)_{13}/\text{TiCl}_2^i\text{Bu}$ | -20051.28622           | -20056.81418    |
|          | ID                                                         | -924.2501219           | -924.2501219    |
|          | ED                                                         | -912.0362061           | -912.0362061    |
|          | $\text{Al}_2\text{Et}_4\text{Cl}_2$                        | -1722.29544            | -1722.600873    |
|          | ID/ED/ $(\text{MgCl}_2)_{13}/\text{TiCl}_2^i\text{Bu}$     | -18328.96458           | -18334.19813    |

<sup>a</sup>Basis set 1 (BS1): def2-SVP basis set was used for Mg and Cl, and def2-TZVP was used for C, H, O, Si, Al and Ti.

<sup>b</sup>ID refers to DIBP, ED refers to DCPDMS, and Al refers to  $\text{AlEt}_2\text{Cl}$ .

**Table S2.** Absolute electronic energies (E) (in hartree) for the intermediates and transition states in the reaction between  $\text{AlEt}_3$  and DIBP on the  $(\text{MgCl}_2)_{13}/\text{TiCl}_2^i\text{Bu}$  cluster.

|                                         | imaginary frequencies ( $\text{cm}^{-1}$ ) | E                      |                 |
|-----------------------------------------|--------------------------------------------|------------------------|-----------------|
|                                         |                                            | B3LYP/BS1 <sup>a</sup> | B3LYP/def2-TZVP |
| $\text{Al}_2\text{Et}_6$                | -                                          | -960.4770347           | -960.4770347    |
| $\text{Al}_3\text{Et}_9$                | -                                          | -1440.703116           | -1440.703116    |
| <b>TS1<sub>Al</sub></b>                 | 283.8i                                     | -18821.39134           | -18826.62147    |
| <b>TS2<sub>Al</sub></b>                 | 262.6i                                     | -20543.71155           | -20549.23425    |
| <b>Et-ID-<math>\text{AlEt}_2</math></b> | -                                          | -1404.543139           | -1404.543139    |

<sup>a</sup>Basis set 1 (BS1): def2-SVP basis set was used for Mg and Cl, and def2-TZVP was used for C, H, O, Si, Al and Ti.

<sup>b</sup>ID refers to DIBP.

**Table S3.** Absolute electronic energies (E) (in hartree) for propene insertion on the  $(\text{MgCl}_2)_{13}/\text{TiCl}_2^i\text{Bu}$  clusters.

|          |                                                            | imaginary frequencies ( $\text{cm}^{-1}$ ) | E                      |                 |              |
|----------|------------------------------------------------------------|--------------------------------------------|------------------------|-----------------|--------------|
|          |                                                            |                                            | B3LYP/BS1 <sup>a</sup> | B3LYP/def2-TZVP |              |
| <b>2</b> | 2ID/ $(\text{MgCl}_2)_{13}/\text{TiCl}_2^i\text{Bu}$       | 1,2-re                                     | 90.5i                  | -18459.13559    | -18464.36656 |
|          |                                                            | 1,2-si                                     | 269.7i                 | -18459.13577    | -18464.36698 |
| <b>6</b> | 2Al/2ID/ $(\text{MgCl}_2)_{13}/\text{TiCl}_2^i\text{Bu}$   | 1,2-re                                     | 334.8i                 | -20181.50023    | -20186.98352 |
|          |                                                            | 1,2-si                                     | 315.2i                 | -20181.49936    | -20186.98529 |
| <b>7</b> | 2Al/ID/ $(\text{MgCl}_2)_{13}/\text{TiCl}_2^i\text{Bu}$    | 1,2-re                                     | 339.2i                 | -19257.15036    | -19262.68195 |
|          |                                                            | 1,2-si                                     | 295.0i                 | -19257.15177    | -19262.68426 |
| <b>8</b> | 2Al/ID/ED/ $(\text{MgCl}_2)_{13}/\text{TiCl}_2^i\text{Bu}$ | 1,2-re                                     | 293.1i                 | -20169.22554    | -20174.74939 |
|          |                                                            | 1,2-si                                     | 50.6i                  | -20169.22713    | -20174.75172 |

<sup>a</sup>Basis set 1 (BS1): def2-SVP basis set was used for Mg and Cl, and def2-TZVP was used for C, H, O, Si, Al and Ti.

<sup>b</sup>ID refers to DIBP, ED refers to DCPDMS, and Al refers to  $\text{AlEt}_2\text{Cl}$ .

**Table S4.** The calculated and experimental C=O frequencies (cm<sup>-1</sup>) of phthalate.

|                                                                                                                        | B3LYP/BS1 <sup>b</sup> | Exp <sup>c</sup> |
|------------------------------------------------------------------------------------------------------------------------|------------------------|------------------|
| free ID <sup>a</sup>                                                                                                   | 1712                   | 1725             |
| 2ID <sup>a</sup> /(MgCl <sub>2</sub> ) <sub>13</sub> /TiCl <sub>2</sub> <sup>i</sup> Bu ( <b>2</b> )                   | 1685                   | 1707             |
| 2Al <sup>a</sup> /2ID <sup>a</sup> /(MgCl <sub>2</sub> ) <sub>13</sub> /TiCl <sub>2</sub> <sup>i</sup> Bu ( <b>6</b> ) | 1676                   | -                |
| Et-ID <sup>a</sup> -AlEt <sub>2</sub>                                                                                  | 1599                   | 1625             |

<sup>a</sup>ID refers to DIBP and Al refers to AlEt<sub>2</sub>Cl.

<sup>b</sup>Calculated C=O frequency of DIBP by B3LYP/BS1. For BS1, def2-SVP basis set was used for Mg and Cl, and def2-TZVP was used for C, H, O, Si, Al and Ti. The scaling factor of 0.965 cm<sup>-1</sup> is applied.

<sup>c</sup>Experimental C=O frequency of DBP from *ACS Catal.* **2021**, *11*, 13782-13796.

**Table S5.** The difference in the percent buried volume between occupied and free quadrants ( $\Delta\%V_{\text{Bur}}$ ) from the buried volume analysis using SambVca.<sup>a</sup> The Ti atom is the center of the sphere with C $\alpha$ -Mg<sub>5</sub> as the z-axis and Cl<sub>3</sub>-Cl<sub>4</sub> as the xz-plane. Sphere radius used to calculate buried volume of 3.5 to 6.0 Å. Hydrogen atoms were not included in the analysis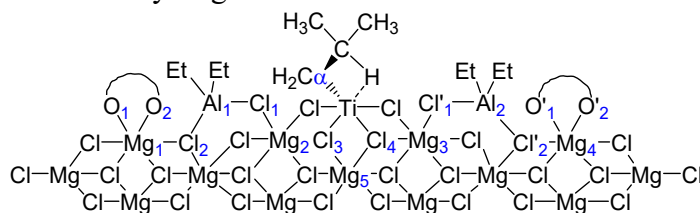

| (MgCl <sub>2</sub> ) <sub>13</sub> /TiCl <sub>2</sub> <sup>i</sup> Bu cluster <sup>b</sup> |           | $\Delta E_{\text{a, re-si}}$ (kcal/mol) | $\Delta\%V_{\text{Bur}}$ |      |      |      |      |      |
|--------------------------------------------------------------------------------------------|-----------|-----------------------------------------|--------------------------|------|------|------|------|------|
|                                                                                            |           |                                         | 3.5                      | 4.0  | 4.5  | 5.0  | 5.5  | 6.0  |
| <b>2</b>                                                                                   | 2ID       | 0.27                                    | 13.8                     | 15.0 | 15.2 | 16.0 | 16.8 | 17.0 |
| <b>6</b>                                                                                   | 2Al/2ID   | 1.12                                    | 20.3                     | 23.7 | 25.0 | 26.1 | 26.9 | 28.0 |
| <b>7</b>                                                                                   | 2Al/ID    | 1.45                                    | 21.2                     | 24.2 | 25.2 | 25.8 | 26.0 | 26.7 |
| <b>8</b>                                                                                   | 2Al/ID/ED | 1.46                                    | 18.3                     | 22.2 | 24.4 | 26.2 | 27.3 | 28.7 |

<sup>a</sup>(i) Poater, A.; Cosenza, B.; Correa, A.; Giudice, S.; Ragone, F.; Scarano, V.; Cavallo, L. *Eur. J. Inorg. Chem.* **2009**, 1759-1766. (ii) Poater, A.; Ragone, F.; Giudice, S.; Costabile, C.; Dorta, R.; Nolan, S. P.; Cavallo, L.

*Organometallics* **2008**, *27*, 2679-2681.

<sup>b</sup>ID refers to DIBP, ED refers to DCPDMS, and Al refers to AlEt<sub>2</sub>Cl on the clusters.

**Table S6.** The adsorption energies ( $\Delta E_{\text{ads}}$  in kcal/mol) of dimethyl phthalate (DMP), diisobutyl phthalate (DIBP) and  $\text{AlEt}_2\text{Cl}$  on the  $(\text{MgCl}_2)_{13}/\text{TiCl}_2^i\text{Bu}$  cluster. Selected bond distances are shown in Å.

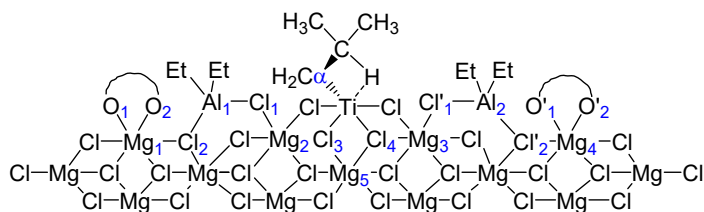

| cluster <sup>a</sup> | $\Delta E_{\text{ads}}$  |                    | bond distance (Å)        |                          |                           |                           |                           |                           |                            |                            |       |
|----------------------|--------------------------|--------------------|--------------------------|--------------------------|---------------------------|---------------------------|---------------------------|---------------------------|----------------------------|----------------------------|-------|
|                      | $\text{AlEt}_2\text{Cl}$ | ID/ED              | $\text{O}_1\text{-Mg}_1$ | $\text{O}_2\text{-Mg}_1$ | $\text{O}'_1\text{-Mg}_4$ | $\text{O}'_2\text{-Mg}_4$ | $\text{Cl}_1\text{-Mg}_2$ | $\text{Cl}_2\text{-Al}_1$ | $\text{Cl}'_1\text{-Mg}_3$ | $\text{Cl}'_2\text{-Al}_2$ |       |
| <b>4</b>             | 2Al                      | -2.77 <sup>b</sup> | -                        | -                        | -                         | -                         | -                         | 2.609                     | 2.455                      | 2.634                      | 2.455 |
| <b>2</b>             | 2DIBP                    | -                  | -29.68 <sup>b</sup>      | 2.068                    | 2.049                     | 2.064                     | 2.067                     | -                         | -                          | -                          | -     |
| <b>6</b>             | 2Al/2DIBP                | -6.34 <sup>b</sup> | -33.25 <sup>b</sup>      | 2.051                    | 1.999                     | 2.009                     | 2.049                     | 2.585                     | 2.412                      | 2.607                      | 2.406 |
| <b>9</b>             | 2DMP                     | -                  | -28.54 <sup>b</sup>      | 2.077                    | 2.057                     | 2.077                     | 2.071                     | -                         | -                          | -                          | -     |
| <b>11</b>            | 2Al/2DMP                 | -5.90 <sup>b</sup> | -31.66 <sup>b</sup>      | 2.057                    | 2.005                     | 2.017                     | 2.053                     | 2.590                     | 2.414                      | 2.612                      | 2.408 |

<sup>a</sup>DMP refers to dimethyl phthalate, DIBP refers to diisobutyl phthalate, and Al refers to  $\text{AlEt}_2\text{Cl}$  on the  $(\text{MgCl}_2)_{13}/\text{TiCl}_2^i\text{Bu}$  cluster.

<sup>b</sup>The average adsorption energies of two adsorbed molecules.

## Cartesian coordinates of optimized geometries

### DIBP

Total atoms = 42

|   |              |              |              |
|---|--------------|--------------|--------------|
| C | -3.202926185 | 0.748820449  | 1.107449042  |
| C | -3.151084524 | -1.033161613 | -1.013541577 |
| C | -1.977577344 | 0.374948296  | 0.557066184  |
| C | -4.392155622 | 0.243979770  | 0.601130117  |
| C | -4.366507640 | -0.641997235 | -0.468964201 |
| C | -1.950551502 | -0.546703496 | -0.499140655 |
| C | -0.765277632 | 1.058175498  | 1.106269776  |
| O | -0.623198137 | 1.347107500  | 2.269028795  |
| O | 0.109564013  | 1.383756780  | 0.140261943  |
| C | -0.695403064 | -1.109035869 | -1.091799383 |
| O | -0.510795828 | -1.242065066 | -2.275651260 |
| O | 0.157585947  | -1.530641435 | -0.142267608 |
| C | 1.299468171  | 2.091407767  | 0.554623455  |
| C | 1.385311015  | -2.141263353 | -0.597756582 |
| C | 2.100656987  | 2.466636256  | -0.683048770 |
| C | 1.322134584  | 3.407392034  | -1.604760839 |
| C | 3.436597752  | 3.079770404  | -0.253321469 |
| C | 2.063505926  | -2.825175184 | 0.580235204  |
| C | 2.447399746  | -1.837852899 | 1.683743576  |
| C | 3.282334041  | -3.604649413 | 0.077565289  |
| H | -3.206330968 | 1.452585854  | 1.928828289  |
| H | -5.335529022 | 0.548828575  | 1.035540021  |
| H | -5.289800012 | -1.033962576 | -0.875934602 |
| H | -3.117276311 | -1.732415016 | -1.838296317 |
| H | 1.000280380  | 2.976193987  | 1.121383802  |
| H | 1.871078891  | 1.444572886  | 1.222622468  |
| H | 2.020648907  | -1.361589397 | -1.028324766 |
| H | 1.147107868  | -2.851998044 | -1.389549342 |



|   |             |              |              |
|---|-------------|--------------|--------------|
| H | 2.307651164 | 1.541551832  | -1.232160106 |
| H | 1.099419723 | 4.350761111  | -1.097537387 |
| H | 0.379400137 | 2.962601387  | -1.922837106 |
| H | 1.903702510 | 3.640011099  | -2.498874105 |
| H | 4.013301202 | 2.395455006  | 0.372931186  |
| H | 3.282294078 | 4.002296411  | 0.313075372  |
| H | 4.044113152 | 3.326671179  | -1.125471905 |
| H | 1.344465510 | -3.540933173 | 0.993418473  |
| H | 2.904570086 | -2.360076513 | 2.526479089  |
| H | 1.579194483 | -1.295206963 | 2.057302765  |
| H | 3.174276384 | -1.108022749 | 1.314373764  |
| H | 3.006099398 | -4.343001445 | -0.678215188 |
| H | 3.766187333 | -4.133473377 | 0.900325163  |
| H | 4.024348899 | -2.933860795 | -0.364549489 |

### DCPDMS

Total atom = 39

|    |              |              |              |
|----|--------------|--------------|--------------|
| SI | 0.000000000  | -0.000000000 | 0.468648460  |
| O  | -1.275977210 | -0.462347838 | 1.413197156  |
| O  | 1.275977210  | 0.462347838  | 1.413197156  |
| C  | -0.374455392 | 1.519819781  | -0.570189144 |
| C  | -0.601696337 | 2.846778946  | 0.216637348  |
| C  | -0.000000000 | 3.983170245  | -0.657136677 |
| C  | 0.383211604  | 3.325023343  | -1.991715138 |
| C  | 0.717773693  | 1.880831792  | -1.604200181 |
| C  | 0.374455392  | -1.519819781 | -0.570189144 |
| C  | 0.601696337  | -2.846778946 | 0.216637348  |
| C  | -0.000000000 | -3.983170245 | -0.657136677 |
| C  | -0.383211604 | -3.325023343 | -1.991715138 |
| C  | -0.717773693 | -1.880831792 | -1.604200181 |
| C  | -1.952947875 | 0.303751257  | 2.391774247  |

|   |              |              |              |
|---|--------------|--------------|--------------|
| C | 1.952947875  | -0.303751257 | 2.391774247  |
| H | -1.290095140 | 1.298386322  | -1.132309714 |
| H | -0.107392385 | 2.824430426  | 1.188748647  |
| H | -1.664561259 | 3.005537772  | 0.405528412  |
| H | -0.693447585 | 4.815207916  | -0.788919297 |
| H | 0.892655283  | 4.388577152  | -0.175612747 |
| H | 1.205914472  | 3.837411160  | -2.494493144 |
| H | -0.470508639 | 3.329122454  | -2.676346153 |
| H | 1.709186490  | 1.844282770  | -1.141568978 |
| H | 0.730820811  | 1.202480463  | -2.459498737 |
| H | 1.290095140  | -1.298386322 | -1.132309714 |
| H | 0.107392385  | -2.824430426 | 1.188748647  |
| H | 1.664561259  | -3.005537772 | 0.405528412  |
| H | 0.693447585  | -4.815207916 | -0.788919297 |
| H | -0.892655283 | -4.388577152 | -0.175612747 |
| H | -1.205914472 | -3.837411160 | -2.494493144 |
| H | 0.470508639  | -3.329122454 | -2.676346153 |
| H | -1.709186490 | -1.844282770 | -1.141568978 |
| H | -0.730820811 | -1.202480463 | -2.459498737 |
| H | -1.255818027 | 0.823774572  | 3.055994900  |
| H | -2.565286305 | -0.371262165 | 2.991918624  |
| H | -2.609739052 | 1.046611282  | 1.929419014  |
| H | 1.255818027  | -0.823774572 | 3.055994900  |
| H | 2.565286305  | 0.371262165  | 2.991918624  |
| H | 2.609739052  | -1.046611282 | 1.929419014  |

**Al<sub>2</sub>Et<sub>4</sub>Cl<sub>2</sub>**

Total atom = 32

|    |              |              |              |
|----|--------------|--------------|--------------|
| AL | -1.663238030 | -0.000011240 | 0.000028654  |
| AL | 1.663218191  | -0.000014644 | -0.000011996 |
| C  | -2.523807433 | -1.761717759 | -0.001373502 |

|    |              |              |              |
|----|--------------|--------------|--------------|
| C  | -2.523859927 | 1.761668244  | 0.001394906  |
| C  | 2.523796987  | 1.761689845  | -0.000805970 |
| C  | 2.523869050  | -1.761680039 | 0.000799132  |
| C  | 3.394953861  | -2.061795567 | 1.234254954  |
| C  | -3.394894286 | 2.061434060  | 1.234971814  |
| C  | -3.394783238 | -2.061491238 | -1.234990642 |
| C  | 3.394771480  | 2.061938689  | -1.234304659 |
| CL | 0.000006067  | -0.000265521 | 1.658393404  |
| CL | -0.000017012 | 0.000257486  | -1.658375449 |
| H  | -1.752070873 | -2.531471064 | 0.102629263  |
| H  | -3.134222918 | -1.841310774 | 0.906613363  |
| H  | -3.134243371 | 1.841219237  | -0.906617882 |
| H  | -1.752148567 | 2.531448325  | -0.102595114 |
| H  | 1.752055241  | 2.531398905  | 0.103491083  |
| H  | 3.134208530  | 1.840942626  | 0.907214588  |
| H  | 1.752179560  | -2.531453458 | -0.103401554 |
| H  | 3.134225300  | -1.840934926 | -0.907258689 |
| H  | 3.859900770  | -3.049678003 | 1.175132431  |
| H  | 2.808425494  | -2.038559358 | 2.156176550  |
| H  | 4.203085337  | -1.334586267 | 1.348372794  |
| H  | -3.859807783 | 3.049351395  | 1.176169824  |
| H  | -4.203048633 | 1.334218823  | 1.348890371  |
| H  | -2.808337598 | 2.037892129  | 2.156867661  |
| H  | -4.202961774 | -1.334305126 | -1.348923921 |
| H  | -2.808192196 | -2.037906591 | -2.156863533 |
| H  | -3.859660640 | -3.049427966 | -1.176227954 |
| H  | 2.808180548  | 2.038707464  | -2.156186599 |
| H  | 3.859648066  | 3.049853224  | -1.175162049 |
| H  | 4.202950523  | 1.334797113  | -1.348518656 |

**Al<sub>2</sub>Et<sub>6</sub>**

Total atom = 44

|    |              |              |              |
|----|--------------|--------------|--------------|
| AL | -1.299304693 | 0.097418965  | -0.034454716 |
| C  | -0.038392054 | -0.135478430 | 1.732928223  |
| C  | -0.023169347 | -1.527917094 | 2.392428257  |
| C  | 0.038390528  | -0.135480915 | -1.732928752 |
| C  | 0.023158964  | -1.527920047 | -2.392427542 |
| AL | 1.299303338  | 0.097420543  | 0.034453787  |
| C  | -2.016471663 | 1.946267502  | -0.007616898 |
| C  | -2.881561105 | 2.347718669  | -1.215946356 |
| C  | -2.576424126 | -1.414372570 | -0.078544206 |
| C  | -3.686120588 | -1.348913364 | 0.987205041  |
| C  | 2.016486141  | 1.946262390  | 0.007614450  |
| C  | 2.881574091  | 2.347704392  | 1.215948245  |
| C  | 2.576416199  | -1.414376877 | 0.078544856  |
| C  | 3.686113074  | -1.348923075 | -0.987204284 |
| H  | -0.905300650 | 0.425440147  | 2.116315324  |
| H  | -0.762461849 | 0.475473249  | -2.177301026 |
| H  | 0.762469311  | 0.475467568  | 2.177296062  |
| H  | 0.905307206  | 0.425428159  | -2.116312250 |
| H  | -2.619580765 | 2.045069489  | 0.904942016  |
| H  | -1.205864555 | 2.673042819  | 0.113713631  |
| H  | -2.060552377 | -2.377797169 | -0.012558374 |
| H  | -3.043637156 | -1.413085484 | -1.071877716 |
| H  | 2.619601990  | 2.045054069  | -0.904941127 |
| H  | 1.205889458  | 2.673048079  | -0.113722139 |
| H  | 3.043628933  | -1.413091803 | 1.071878521  |
| H  | 2.060540497  | -2.377799354 | 0.012558997  |
| H  | -3.729913985 | 1.671186375  | -1.351701116 |
| H  | -2.310606819 | 2.332739716  | -2.149221810 |

|   |              |              |              |
|---|--------------|--------------|--------------|
| H | -3.291641513 | 3.357188711  | -1.116844579 |
| H | -4.401386252 | -2.170875452 | 0.889374967  |
| H | -4.256628376 | -0.419090841 | 0.919892409  |
| H | -3.282131451 | -1.400423300 | 2.002181826  |
| H | 2.310613518  | 2.332736715  | 2.149220005  |
| H | 3.291669909  | 3.357168104  | 1.116845892  |
| H | 3.729916250  | 1.671160138  | 1.351710409  |
| H | 4.401375187  | -2.170888232 | -0.889373898 |
| H | 4.256624984  | -0.419103040 | -0.919892240 |
| H | 3.282123604  | -1.400431851 | -2.002181027 |
| H | 0.893617538  | -2.070816458 | 2.164718636  |
| H | -0.853859279 | -2.144785597 | 2.050670457  |
| H | -0.096736512 | -1.453370253 | 3.480316138  |
| H | -0.893636789 | -2.070808473 | -2.164727548 |
| H | 0.853837916  | -2.144797906 | -2.050659868 |
| H | 0.096738938  | -1.453375238 | -3.480314694 |

### **Propene**

Total atom = 9

|   |              |              |              |
|---|--------------|--------------|--------------|
| C | 0.133550942  | -0.451866596 | 0.000045504  |
| C | 1.278406053  | 0.219621052  | 0.000027258  |
| C | -1.230849615 | 0.162109922  | -0.000066347 |
| H | 2.234373813  | -0.288325709 | 0.000154991  |
| H | 1.301136328  | 1.304014072  | -0.000080241 |
| H | 0.166065670  | -1.538738256 | 0.000187215  |
| H | -1.803841867 | -0.153834141 | 0.876852253  |
| H | -1.180532878 | 1.251916543  | -0.000307402 |
| H | -1.803845333 | -0.154218784 | -0.876845305 |

**(MgCl<sub>2</sub>)<sub>13</sub>/TiCl<sub>2</sub><sup>i</sup>Bu cluster 1**

Total atom = 55

|    |               |              |              |
|----|---------------|--------------|--------------|
| CL | -10.824700511 | -2.436663258 | 1.420414326  |
| MG | -9.014089920  | -2.544904397 | 0.080281518  |
| CL | -4.767035287  | -2.407867271 | 1.404239587  |
| MG | -2.957715131  | -2.516717133 | 0.065651502  |
| CL | -7.180706514  | -2.650768600 | -1.228495402 |
| CL | -1.153710537  | -2.627443832 | -1.285563739 |
| CL | 1.038392973   | -2.367963415 | 1.520318382  |
| MG | 2.841776430   | -2.479262927 | 0.171277556  |
| CL | 7.094878185   | -2.341450493 | 1.473421510  |
| MG | 8.896634904   | -2.453457997 | 0.126239469  |
| CL | 4.714574913   | -2.581730671 | -1.081650261 |
| CL | 10.679466667  | -2.568505268 | -1.253310369 |
| CL | -13.909146401 | -0.366000876 | -0.310218694 |
| MG | -11.745573057 | -0.522250111 | 0.164929088  |
| CL | -10.111296624 | -0.900870433 | -1.403314204 |
| MG | -5.952961474  | -0.750556288 | -0.097505966 |
| CL | -7.982068508  | -0.663132940 | 1.441718304  |
| CL | -3.963316349  | -0.739195175 | -1.516264088 |
| MG | -0.049906152  | -0.617635921 | -0.059274685 |
| CL | -2.028533073  | -0.443718073 | 1.295556759  |
| CL | 1.925264509   | -0.730961414 | -1.437701708 |
| MG | 5.874931256   | -0.651439224 | 0.113521001  |
| MG | 11.848379447  | -0.717870824 | -0.136243981 |
| CL | 3.827275103   | -0.454874712 | 1.447828373  |
| CL | 8.005862952   | -0.607233883 | -1.312376481 |
| CL | 10.022345675  | -0.882927813 | 1.668511734  |
| CL | 13.999415583  | -0.920682867 | 0.405269089  |
| CL | -10.777074899 | 1.695078769  | 0.809838680  |

|    |              |             |              |
|----|--------------|-------------|--------------|
| MG | -8.835435319 | 0.949037600 | -0.210585143 |
| CL | -5.160333736 | 1.272543825 | 1.138154855  |
| CL | -7.062648501 | 1.060932642 | -1.666913276 |
| MG | -3.148666646 | 1.268570241 | -0.086012091 |
| CL | 0.989097997  | 1.552640355 | 1.153292492  |
| CL | -1.117634694 | 1.299365056 | -1.648876558 |
| MG | 2.999135487  | 1.237417342 | -0.370430661 |
| CL | 6.990131037  | 1.378373352 | 1.488621712  |
| CL | 5.088600587  | 1.143654115 | -1.418565064 |
| MG | 8.942802369  | 0.945494770 | 0.360673289  |
| CL | 10.963452679 | 1.518053817 | -0.694910315 |
| TI | -0.083688935 | 3.289543671 | -0.443690069 |
| CL | -2.277738731 | 3.385552291 | 0.687531667  |
| CL | 2.065082254  | 3.071556815 | -1.657425746 |
| C  | -0.086036515 | 5.336054548 | -0.729317922 |
| C  | 0.644449118  | 5.484316872 | 0.593740732  |
| C  | 2.056898061  | 6.073492596 | 0.459926147  |
| C  | -0.174000097 | 6.197283500 | 1.680898164  |
| H  | 0.493338365  | 5.623967371 | -1.617603399 |
| H  | -1.105120425 | 5.745932244 | -0.751808215 |
| H  | 0.821908964  | 4.430840577 | 1.024760071  |
| H  | 2.598564379  | 6.031971199 | 1.418282023  |
| H  | 2.648117677  | 5.539733875 | -0.297367539 |
| H  | 1.985249522  | 7.130286053 | 0.156947029  |
| H  | 0.342143676  | 6.163366324 | 2.653288361  |
| H  | -0.307893817 | 7.255132877 | 1.403768847  |
| H  | -1.169005212 | 5.746901273 | 1.803944152  |

## 2DIBP/(MgCl<sub>2</sub>)<sub>13</sub>/TiCl<sub>2</sub><sup>i</sup>Bu cluster 2

Total atom = 139

|    |               |              |              |
|----|---------------|--------------|--------------|
| CL | 10.779823021  | -3.749063568 | -1.704370927 |
| MG | 9.011532143   | -3.841961384 | -0.307764568 |
| CL | 4.725440980   | -3.739391170 | -1.502829331 |
| MG | 2.958381545   | -3.832980626 | -0.107789961 |
| CL | 7.219442270   | -3.933090045 | 1.058069858  |
| CL | 1.197014096   | -3.928174488 | 1.299676085  |
| CL | -1.080934903  | -3.719897797 | -1.441352950 |
| MG | -2.841726158  | -3.815727968 | -0.036038234 |
| CL | -7.133172449  | -3.711980870 | -1.209061456 |
| MG | -8.892431492  | -3.808505062 | 0.194273481  |
| CL | -4.674900216  | -3.904450292 | 1.275195463  |
| CL | -10.631693096 | -3.907531166 | 1.629524444  |
| CL | 13.908263839  | -1.641595014 | -0.101788245 |
| MG | 11.731840120  | -1.812294406 | -0.507815082 |
| CL | 10.147637696  | -2.171260328 | 1.115529691  |
| MG | 5.950598858   | -2.054819379 | -0.064246317 |
| CL | 7.931358005   | -1.985139474 | -1.666161580 |
| CL | 4.005374681   | -2.027563742 | 1.414526677  |
| MG | 0.048800292   | -1.941490082 | 0.076547145  |
| CL | 1.984346084   | -1.782542938 | -1.340898465 |
| CL | -1.882809538  | -2.039355436 | 1.516536016  |
| MG | -5.878324815  | -1.996879668 | 0.086147794  |
| MG | -11.841294667 | -2.078592148 | 0.520036966  |
| CL | -3.873254594  | -1.814852130 | -1.313240056 |
| CL | -7.964797229  | -1.937064453 | 1.575891419  |
| CL | -10.070639003 | -2.266041067 | -1.337023709 |
| CL | -14.007049914 | -2.296780228 | 0.048080410  |
| CL | 10.813788405  | 0.081112082  | -1.633147830 |



|    |               |              |              |
|----|---------------|--------------|--------------|
| MG | 8.853169946   | -0.023525563 | -0.108489016 |
| CL | 5.052809727   | -0.059395305 | -1.362094216 |
| CL | 7.043668774   | -0.369288263 | 1.430093095  |
| MG | 3.154376984   | -0.068099948 | 0.001805820  |
| CL | -1.019280137  | 0.210051520  | -1.157939454 |
| CL | 1.136581638   | 0.032403986  | 1.603215981  |
| MG | -3.004027591  | -0.117436410 | 0.413573708  |
| CL | -6.924756087  | -0.194083180 | -1.330828147 |
| CL | -4.997181006  | -0.182322006 | 1.626085021  |
| MG | -8.987899098  | -0.120136044 | -0.083102329 |
| CL | -11.019343189 | -0.053092950 | 1.406846884  |
| TI | 0.074387162   | 1.974154717  | 0.363562941  |
| CL | 2.272147812   | 2.085205585  | -0.756268293 |
| CL | -2.058999761  | 1.805314297  | 1.614250210  |
| C  | 0.040687484   | 4.044968879  | 0.555819903  |
| C  | -0.693214271  | 4.112020579  | -0.770231073 |
| O  | -10.018257624 | 1.118062893  | -1.378723206 |
| C  | -10.331659633 | 2.294377987  | -1.451164802 |
| C  | -8.107019422  | 2.809398185  | 0.695297281  |
| O  | -8.475242951  | 1.655432437  | 0.836236431  |
| O  | 9.931102436   | 1.214018781  | 1.140971129  |
| C  | 10.253583006  | 2.364384649  | 1.382992564  |
| C  | 8.283987323   | 2.933011048  | -0.991917256 |
| O  | 8.237870606   | 1.715570461  | -0.989276605 |
| O  | -11.572970230 | 2.686697146  | -1.635675481 |
| C  | -12.606354749 | 1.645197471  | -1.735209399 |
| O  | -7.454438504  | 3.445754170  | 1.648416714  |
| C  | -7.140286334  | 2.691361058  | 2.864004404  |
| O  | 11.447662122  | 2.677549412  | 1.839297340  |
| O  | 8.148900500   | 3.640839764  | -2.096520972 |

|   |               |             |              |
|---|---------------|-------------|--------------|
| C | 12.397993157  | 1.580470858 | 2.068207864  |
| C | 7.982630388   | 2.920476887 | -3.363452097 |
| C | -2.109918204  | 4.686446626 | -0.661517320 |
| C | 0.108734089   | 4.789556357 | -1.886670133 |
| C | 9.351881009   | 3.556006135 | 1.274391754  |
| C | 8.454299448   | 3.804578193 | 0.214731274  |
| C | 9.429144396   | 4.476238926 | 2.322455224  |
| C | 7.672597120   | 4.961647157 | 0.251701996  |
| C | 7.729964616   | 5.840034467 | 1.322721050  |
| C | 8.613901454   | 5.596887637 | 2.363051059  |
| C | -8.329848554  | 3.655226462 | -0.517677162 |
| C | -9.364814835  | 3.441794381 | -1.453317748 |
| C | -9.515720505  | 4.336822742 | -2.513726690 |
| C | -7.480401780  | 4.750783627 | -0.699027720 |
| C | -7.618583283  | 5.605941009 | -1.780866410 |
| C | -8.643996438  | 5.400831951 | -2.691225478 |
| C | 13.764861211  | 2.172532400 | 2.359931222  |
| C | 6.524474592   | 2.594942707 | -3.657326316 |
| C | 5.671225470   | 3.854847997 | -3.812266082 |
| C | 6.461727059   | 1.711222589 | -4.906878914 |
| C | 14.340688551  | 2.885979908 | 1.134598325  |
| C | 14.690817613  | 1.049005326 | 2.840972494  |
| C | -13.972713629 | 2.303356316 | -1.686617292 |
| C | -6.242722395  | 3.543752999 | 3.743030320  |
| C | -15.034466109 | 1.236173845 | -1.979102845 |
| C | -14.221048722 | 2.990635687 | -0.342024588 |
| C | -5.780416593  | 2.698312433 | 4.934509896  |
| C | -6.927678573  | 4.833948804 | 4.197579631  |
| H | -0.543502896  | 4.370258193 | 1.413949318  |
| H | 1.033222204   | 4.489428388 | 0.549108087  |

|   |               |             |              |
|---|---------------|-------------|--------------|
| H | -0.854919956  | 3.049277363 | -1.151845749 |
| H | -2.646875275  | 4.588351138 | -1.607412815 |
| H | -2.683752832  | 4.183515165 | 0.115655851  |
| H | -2.051952314  | 5.748252633 | -0.412602411 |
| H | -0.403053582  | 4.700500276 | -2.846948050 |
| H | 0.221601533   | 5.851738063 | -1.659341695 |
| H | 1.101835326   | 4.354220960 | -1.987753280 |
| H | 8.396387693   | 3.610441250 | -4.098514691 |
| H | 8.593630747   | 2.021413446 | -3.320985579 |
| H | 12.014601193  | 0.994093984 | 2.903972534  |
| H | 12.418704404  | 0.953618584 | 1.178626036  |
| H | -8.085028889  | 2.450059109 | 3.355153543  |
| H | -6.653036821  | 1.765595896 | 2.565806079  |
| H | -12.437234595 | 1.114024685 | -2.672447262 |
| H | -12.464793075 | 0.954484942 | -0.906430913 |
| H | 7.093575033   | 6.715095207 | 1.335070189  |
| H | 8.678838298   | 6.278804117 | 3.200678384  |
| H | 7.006623103   | 5.165019615 | -0.573765179 |
| H | 10.136954406  | 4.297481009 | 3.118555390  |
| H | -10.325293528 | 4.183859145 | -3.212897542 |
| H | -6.932709882  | 6.433839960 | -1.903221731 |
| H | -8.772816165  | 6.066032893 | -3.534995559 |
| H | -6.698893448  | 4.923808630 | 0.024792055  |
| H | 13.647416091  | 2.899404033 | 3.171768249  |
| H | 6.140824760   | 2.008674404 | -2.819554933 |
| H | 5.997893417   | 4.449308923 | -4.670599293 |
| H | 4.624791039   | 3.588156601 | -3.968505808 |
| H | 5.720688491   | 4.490333497 | -2.926261136 |
| H | 5.426867142   | 1.450431706 | -5.131991635 |
| H | 6.874239634   | 2.224335574 | -5.780547352 |

|   |               |             |              |
|---|---------------|-------------|--------------|
| H | 7.013913416   | 0.781099246 | -4.763350162 |
| H | 14.487719216  | 2.177288548 | 0.315911534  |
| H | 13.681431218  | 3.681717015 | 0.784007534  |
| H | 15.308516083  | 3.332291065 | 1.369905832  |
| H | 15.687225307  | 1.443731267 | 3.045926132  |
| H | 14.318334474  | 0.588110569 | 3.758626627  |
| H | 14.784388384  | 0.266618154 | 2.084663068  |
| H | -14.010377961 | 3.058166806 | -2.480340289 |
| H | -5.358997916  | 3.802727434 | 3.149649433  |
| H | -14.995323257 | 0.424593737 | -1.248826980 |
| H | -16.031850876 | 1.676954113 | -1.941210073 |
| H | -14.900012447 | 0.797636911 | -2.970297341 |
| H | -13.473882707 | 3.759083063 | -0.138391573 |
| H | -15.203150856 | 3.466543646 | -0.331052371 |
| H | -14.191364274 | 2.263653103 | 0.473325841  |
| H | -5.102279643  | 3.272207165 | 5.567876990  |
| H | -6.628836657  | 2.390519960 | 5.551554737  |
| H | -5.256939141  | 1.798819253 | 4.607049311  |
| H | -7.806773335  | 4.611777851 | 4.809098355  |
| H | -6.248568001  | 5.438495965 | 4.801667694  |
| H | -7.252547001  | 5.439403557 | 3.350388379  |

**(MgCl<sub>2</sub>)<sub>13</sub>/TiCl<sub>2</sub><sup>i</sup>Bu/DIBP-Mg1 cluster 5**

Total atom = 97

|    |              |              |              |
|----|--------------|--------------|--------------|
| CL | -8.703845510 | -4.331694467 | 1.584282113  |
| MG | -6.917111332 | -4.214184157 | 0.213241103  |
| CL | -2.693903622 | -3.581096057 | 1.467581449  |
| MG | -0.908328674 | -3.464367627 | 0.098098715  |
| CL | -5.107385074 | -4.091761503 | -1.126639582 |
| CL | 0.872000647  | -3.349944754 | -1.283859625 |
| CL | 3.066598162  | -2.850431506 | 1.487349872  |

|    |               |              |              |
|----|---------------|--------------|--------------|
| MG | 4.846391163   | -2.736797841 | 0.107653436  |
| CL | 9.075315222   | -2.101881122 | 1.340267332  |
| MG | 10.853334702  | -1.989134242 | -0.038201028 |
| CL | 6.695705580   | -2.606677440 | -1.177071648 |
| CL | 12.612766628  | -1.881386571 | -1.448070111 |
| CL | -12.042859245 | -2.631582007 | -0.076246677 |
| MG | -9.868205517  | -2.532327018 | 0.361636380  |
| CL | -8.228149254  | -2.702400066 | -1.237110409 |
| MG | -4.094886928  | -2.066503438 | 0.000662204  |
| CL | -6.092605146  | -2.232215443 | 1.574119845  |
| CL | -2.145980590  | -1.808486168 | -1.450890085 |
| MG | 1.750068218   | -1.231428217 | -0.058171788 |
| CL | -0.211045774  | -1.303900283 | 1.330882843  |
| CL | 3.700118484   | -1.099109556 | -1.470118869 |
| MG | 7.639226689   | -0.559714588 | 0.014853996  |
| MG | 13.572312804  | 0.087340337  | -0.333235807 |
| CL | 5.606157390   | -0.618102750 | 1.385640338  |
| CL | 9.723840686   | -0.252424545 | -1.444917280 |
| CL | 11.811243076  | -0.306229285 | 1.499147461  |
| CL | 15.741678096  | 0.138805472  | 0.169494991  |
| CL | -9.203190950  | -0.529991726 | 1.481351132  |
| MG | -7.244582146  | -0.421016805 | -0.014741501 |
| CL | -3.442339825  | 0.036883325  | 1.307903914  |
| CL | -5.350248186  | -0.529421390 | -1.509645364 |
| MG | -1.554555494  | 0.245462020  | -0.057044822 |
| CL | 2.543529838   | 1.070773895  | 1.132219531  |
| CL | 0.457736349   | 0.549208514  | -1.637127702 |
| MG | 4.552398662   | 0.973358209  | -0.415625207 |
| CL | 8.529241336   | 1.580768129  | 1.395260813  |
| CL | 6.626134362   | 1.145665300  | -1.482090419 |

|    |               |             |              |
|----|---------------|-------------|--------------|
| MG | 10.496359042  | 1.389141823 | 0.227825797  |
| CL | 12.414531420  | 2.203632736 | -0.856091422 |
| TI | 1.254783947   | 2.651008206 | -0.460653462 |
| CL | -0.958080346  | 2.516373856 | 0.639292479  |
| CL | 3.395452642   | 2.684725973 | -1.707800285 |
| C  | 1.038496834   | 4.699692736 | -0.722212266 |
| C  | 1.767824207   | 4.895827142 | 0.592536987  |
| O  | -8.415715460  | 0.689200225 | -1.306814259 |
| C  | -8.726201545  | 1.854184888 | -1.490743447 |
| C  | -6.484754302  | 2.561463007 | 0.572667227  |
| O  | -6.775497904  | 1.398476828 | 0.801889780  |
| O  | -9.969207361  | 2.231157661 | -1.689822264 |
| O  | -5.924679556  | 3.325972543 | 1.487912324  |
| C  | -11.005017204 | 1.185349696 | -1.662892705 |
| C  | -5.613787434  | 2.713940110 | 2.781361202  |
| C  | 3.102873161   | 5.635625722 | 0.453048303  |
| C  | 0.896243753   | 5.499131235 | 1.699323668  |
| C  | -7.751705219  | 2.986885817 | -1.619852787 |
| C  | -6.707081404  | 3.281006839 | -0.718605411 |
| C  | -7.903655272  | 3.774530126 | -2.761919265 |
| C  | -5.845189763  | 4.341332695 | -1.013116950 |
| C  | -5.981806066  | 5.083813980 | -2.175492775 |
| C  | -7.019636782  | 4.803312837 | -3.051558174 |
| C  | -12.369449932 | 1.848971394 | -1.663511001 |
| C  | -4.773247111  | 3.689661650 | 3.585485379  |
| C  | -5.519635098  | 4.990168691 | 3.888492288  |
| C  | -4.307781858  | 2.992529284 | 4.868156768  |
| C  | -12.602006025 | 2.662649608 | -0.388477339 |
| C  | -13.436335641 | 0.762053764 | -1.842232267 |
| H  | 1.574684329   | 5.061234209 | -1.597134255 |

|   |               |             |              |
|---|---------------|-------------|--------------|
| H | -0.000211665  | 5.021723288 | -0.720425748 |
| H | 2.061719472   | 3.870452421 | 1.001294622  |
| H | 3.656297654   | 5.629290150 | 1.394215884  |
| H | 3.728530415   | 5.189835725 | -0.318845938 |
| H | 2.913074140   | 6.675599341 | 0.179920816  |
| H | 1.423036933   | 5.501660384 | 2.655400894  |
| H | 0.650954852   | 6.532327208 | 1.445067423  |
| H | -0.034349579  | 4.946984392 | 1.823603903  |
| H | -6.561964507  | 2.487202667 | 3.273128066  |
| H | -5.083850234  | 1.783519782 | 2.591277527  |
| H | -10.851563970 | 0.559457243 | -2.542382138 |
| H | -10.850507415 | 0.581717974 | -0.770324472 |
| H | -5.285533686  | 5.884467026 | -2.387455004 |
| H | -7.147728256  | 5.382806701 | -3.956411542 |
| H | -5.053901631  | 4.573945241 | -0.316572497 |
| H | -8.722282989  | 3.563650530 | -3.435147389 |
| H | -12.413535456 | 2.525019920 | -2.524973792 |
| H | -3.886904968  | 3.922025001 | 2.985258286  |
| H | -6.404115453  | 4.796303295 | 4.501816093  |
| H | -4.880030045  | 5.682130485 | 4.439507348  |
| H | -5.846665320  | 5.489921915 | 2.975868934  |
| H | -3.669681472  | 3.656978382 | 5.452700028  |
| H | -5.157932770  | 2.713413002 | 5.496270452  |
| H | -3.739896798  | 2.087118322 | 4.647492467  |
| H | -12.567563641 | 2.016293526 | 0.492177093  |
| H | -11.849880511 | 3.443509058 | -0.265855101 |
| H | -13.581911228 | 3.142555197 | -0.413358597 |
| H | -14.432915635 | 1.206016566 | -1.824144923 |
| H | -13.319156697 | 0.237985831 | -2.793013944 |
| H | -13.379676342 | 0.015778593 | -1.047014007 |

**(MgCl<sub>2</sub>)<sub>13</sub>/TiCl<sub>2</sub><sup>i</sup>Bu/DIBP-Mg<sub>4</sub>**

Total atom = 97

|    |               |              |              |
|----|---------------|--------------|--------------|
| CL | 12.793911588  | -1.725838257 | -1.609713666 |
| MG | 11.032231454  | -2.051669617 | -0.239891698 |
| CL | 6.776435500   | -2.413150421 | -1.491773062 |
| MG | 5.016036075   | -2.739545815 | -0.123590140 |
| CL | 9.246933144   | -2.377735562 | 1.098718971  |
| CL | 3.261352893   | -3.067114787 | 1.257063165  |
| CL | 1.005782440   | -3.059256604 | -1.510230814 |
| MG | -0.748239646  | -3.387362431 | -0.131741503 |
| CL | -5.009706626  | -3.748800000 | -1.361568706 |
| MG | -6.762103164  | -4.077374604 | 0.014957628  |
| CL | -2.573899497  | -3.714568683 | 1.151874097  |
| CL | -8.494695603  | -4.406860593 | 1.423613148  |
| CL | 15.641769638  | 0.689165649  | 0.079922520  |
| MG | 13.504109615  | 0.279693795  | -0.359730417 |
| CL | 11.953051611  | -0.294327162 | 1.233653936  |
| MG | 7.783882144   | -0.632195691 | -0.001246908 |
| CL | 9.761732194   | -0.300560244 | -1.573863268 |
| CL | 5.831728452   | -0.860875711 | 1.450668508  |
| MG | 1.906883858   | -1.197806814 | 0.060165744  |
| CL | 3.827396575   | -0.786787740 | -1.326720390 |
| CL | -0.016945509  | -1.548316698 | 1.470918270  |
| MG | -3.974505114  | -1.930957803 | -0.013385175 |
| MG | -9.893346557  | -2.703832744 | 0.336134657  |
| CL | -1.987805748  | -1.489423182 | -1.380787737 |
| CL | -6.070834910  | -2.143603204 | 1.448271008  |
| CL | -8.091907185  | -2.645802025 | -1.499764312 |
| CL | -12.014311627 | -3.157639826 | -0.170203342 |



|    |               |              |              |
|----|---------------|--------------|--------------|
| CL | 12.272179103  | 2.371117145  | -0.974281136 |
| MG | 10.447990571  | 1.395772607  | 0.071562042  |
| CL | 6.743951864   | 1.287062765  | -1.216141765 |
| CL | 8.700694631   | 1.290598101  | 1.558770484  |
| MG | 4.764952563   | 1.042621817  | 0.033653532  |
| CL | 0.619643534   | 0.823438756  | -1.159253994 |
| CL | 2.760018869   | 0.870811644  | 1.619105288  |
| MG | -1.339530008  | 0.258113052  | 0.385234458  |
| CL | -5.201126081  | -0.225795171 | -1.401551124 |
| CL | -3.316012422  | -0.065181413 | 1.580402076  |
| MG | -7.278913774  | -0.416524824 | -0.187695762 |
| CL | -9.317112386  | -0.618806106 | 1.277115724  |
| TI | 1.480356645   | 2.696841078  | 0.382377559  |
| CL | 3.657850873   | 3.058991925  | -0.733507242 |
| CL | -0.622046828  | 2.257602853  | 1.616718461  |
| C  | 1.211761497   | 4.745857566  | 0.583913338  |
| C  | 0.485612638   | 4.733891413  | -0.747044590 |
| O  | -8.430279416  | 0.719760636  | -1.472099488 |
| C  | -8.880841987  | 1.851865236  | -1.526872737 |
| C  | -6.754156037  | 2.579902068  | 0.658107319  |
| O  | -6.985056388  | 1.387742578  | 0.770605476  |
| O  | -10.157323434 | 2.096937482  | -1.723340202 |
| C  | -11.057523468 | 0.942525151  | -1.860967160 |
| O  | -6.188474238  | 3.266710059  | 1.631436117  |
| C  | -5.798559267  | 2.527937040  | 2.834293041  |
| C  | -0.989559863  | 5.137371894  | -0.647369381 |
| C  | 1.211258064   | 5.504431737  | -1.855468534 |
| C  | -7.065410910  | 3.420559508  | -0.538855631 |
| C  | -8.058186227  | 3.106181967  | -1.491787032 |
| C  | -8.304921248  | 4.001008066  | -2.534362704 |

|   |               |              |              |
|---|---------------|--------------|--------------|
| C | -6.352048987  | 4.614022932  | -0.685862574 |
| C | -6.581209563  | 5.471200797  | -1.750586896 |
| C | -7.565523763  | 5.165586495  | -2.677998598 |
| C | -12.492897719 | 1.433976667  | -1.831458197 |
| C | -5.025407095  | 3.463743797  | 3.746222279  |
| C | -13.415320012 | 0.255502731  | -2.166161475 |
| C | -12.847795195 | 2.060532237  | -0.481122384 |
| C | -4.474609638  | 2.653294854  | 4.924424936  |
| C | -5.872210387  | 4.646166027  | 4.220676154  |
| H | 0.588594888   | 4.996557059  | 1.439778484  |
| H | 2.148319976   | 5.298763444  | 0.587960818  |
| H | 0.451834073   | 3.659846892  | -1.133414667 |
| H | -1.504183792  | 4.980541988  | -1.597616950 |
| H | -1.506327133  | 4.568177815  | 0.124151484  |
| H | -1.057969939  | 6.197695465  | -0.395333991 |
| H | 0.720200324   | 5.359381569  | -2.819595203 |
| H | 1.196949748   | 6.571463023  | -1.624147487 |
| H | 2.249591737   | 5.190508129  | -1.951126987 |
| H | -6.711848653  | 2.159142661  | 3.305246866  |
| H | -5.196070858  | 1.677208843  | 2.523096229  |
| H | -10.808704496 | 0.451805672  | -2.802461251 |
| H | -10.850927688 | 0.258672581  | -1.040152613 |
| H | -9.083392316  | 3.768456878  | -3.246757408 |
| H | -5.998724013  | 6.378039251  | -1.846159951 |
| H | -7.765153776  | 5.829807275  | -3.508637485 |
| H | -5.604396871  | 4.863209926  | 0.051400396  |
| H | -12.603090997 | 2.194682247  | -2.612640979 |
| H | -4.174443367  | 3.846330655  | 3.172128142  |
| H | -13.295739821 | -0.559951172 | -1.449123655 |
| H | -14.458198601 | 0.575373940  | -2.143177476 |

|   |               |              |              |
|---|---------------|--------------|--------------|
| H | -13.210024683 | -0.144587715 | -3.161452816 |
| H | -12.200266859 | 2.906758884  | -0.246981455 |
| H | -13.878871285 | 2.418228292  | -0.484349079 |
| H | -12.750195218 | 1.325800336  | 0.321854163  |
| H | -3.882096956  | 3.291777867  | 5.581370898  |
| H | -5.284757558  | 2.225695856  | 5.521121397  |
| H | -3.837936728  | 1.835244157  | 4.584012961  |
| H | -6.723523727  | 4.300342439  | 4.813717155  |
| H | -5.281491361  | 5.315565926  | 4.848715726  |
| H | -6.260496868  | 5.227357300  | 3.383284296  |

### **2DCPDMS/(MgCl<sub>2</sub>)<sub>13</sub>/TiCl<sub>2</sub><sup>i</sup>Bu cluster 3**

Total atom = 133

|    |               |              |              |
|----|---------------|--------------|--------------|
| CL | -10.730853616 | -3.841494687 | 1.550245120  |
| MG | -8.958995556  | -3.831301817 | 0.155308630  |
| CL | -4.676879444  | -3.783976232 | 1.362483653  |
| MG | -2.906509589  | -3.774935518 | -0.033423177 |
| CL | -7.165214169  | -3.822340860 | -1.211395269 |
| CL | -1.142766722  | -3.766206484 | -1.438786637 |
| CL | 1.130245431   | -3.728695920 | 1.313723491  |
| MG | 2.894043104   | -3.719491321 | -0.091396299 |
| CL | 7.182634094   | -3.671061073 | 1.094214050  |
| MG | 8.946692561   | -3.661722808 | -0.311293332 |
| CL | 4.728379977   | -3.709008885 | -1.402770544 |
| CL | 10.686177001  | -3.654011080 | -1.745781985 |
| CL | -13.868669176 | -1.650241935 | 0.085246536  |
| MG | -11.691925727 | -1.838334889 | 0.483102020  |
| CL | -10.104757108 | -2.077739094 | -1.158096705 |
| MG | -5.919219349  | -2.022602941 | 0.041022835  |
| CL | -7.912051723  | -2.026889348 | 1.617958429  |

|    |               |              |              |
|----|---------------|--------------|--------------|
| CL | -3.951823921  | -1.879969736 | -1.411450274 |
| MG | -0.004719125  | -1.869092175 | -0.055449432 |
| CL | -1.939351799  | -1.855560087 | 1.384090654  |
| CL | 1.921080132   | -1.829896474 | -1.509079197 |
| MG | 5.913084971   | -1.882819206 | -0.090233169 |
| MG | 11.881865503  | -1.892795960 | -0.511380016 |
| CL | 3.915893634   | -1.813037731 | 1.322809481  |
| CL | 7.991065046   | -1.703060293 | -1.570442716 |
| CL | 10.112060491  | -2.213748865 | 1.325140950  |
| CL | 14.047172378  | -2.127374351 | -0.054067347 |
| CL | -10.758394104 | 0.016868205  | 1.680217780  |
| MG | -8.844466307  | -0.009359250 | 0.177909404  |
| CL | -5.011068410  | -0.029696598 | 1.399520101  |
| CL | -7.040127310  | -0.293836598 | -1.391312301 |
| MG | -3.036393083  | -0.033397696 | 0.138801732  |
| CL | 0.930400774   | 0.152352771  | 1.193963576  |
| CL | -1.122521103  | 0.036792169  | -1.556292147 |
| CL | 6.981992877   | -0.228318123 | 1.479438131  |
| CL | 4.987418754   | 0.055826168  | -1.448161140 |
| MG | 8.996965858   | -0.000920797 | 0.171240988  |
| CL | 10.998715182  | 0.171222109  | -1.260758075 |
| TI | -0.126749693  | 2.103544204  | -0.520050492 |
| CL | -2.096213874  | 2.137637268  | 0.914728663  |
| CL | 2.280139183   | 2.323162538  | -0.833512403 |
| C  | -0.477698439  | 4.472895115  | -1.335728909 |
| C  | 0.606248280   | 5.309204900  | -2.024166002 |
| C  | -1.690715874  | 5.320368630  | -0.939935893 |
| O  | 8.510680770   | 2.038623504  | -0.407313653 |
| O  | 9.761533964   | 1.458501301  | 1.562113306  |
| O  | -9.695119605  | 1.543141749  | -1.067698350 |

|    |               |             |              |
|----|---------------|-------------|--------------|
| O  | -8.287503652  | 1.971284731 | 0.838220443  |
| MG | 3.004857335   | 0.012734691 | -0.189516861 |
| C  | -0.847834806  | 3.211808813 | -2.097808544 |
| C  | 10.715244641  | 1.322403184 | 2.623907194  |
| C  | 7.905026422   | 2.547212111 | -1.604830934 |
| C  | -7.661619766  | 2.420666814 | 2.049924757  |
| C  | -10.737264543 | 1.475294913 | -2.050943465 |
| C  | -10.267758547 | 4.133103779 | 0.224575946  |
| C  | -11.401748768 | 3.625313833 | 1.146482503  |
| C  | -11.915774001 | 4.902071637 | 1.818179310  |
| C  | -10.632303608 | 5.675533182 | 2.141529005  |
| C  | -9.668822947  | 5.381182709 | 0.964513185  |
| C  | -7.722045165  | 3.718966245 | -1.486668165 |
| C  | -6.220488706  | 3.396176810 | -1.200762987 |
| C  | -5.527203176  | 3.312313993 | -2.586319117 |
| C  | -6.550157086  | 3.845639344 | -3.598288747 |
| C  | -7.895613581  | 3.425141260 | -2.999413940 |
| SI | -8.996792658  | 2.902369620 | -0.371285458 |
| SI | 9.119191933   | 2.874415723 | 0.915566535  |
| C  | 7.769383911   | 3.633439854 | 1.983956530  |
| C  | 6.299953417   | 3.473823798 | 1.478839087  |
| C  | 5.422067030   | 3.317556682 | 2.749641523  |
| C  | 6.348048356   | 3.612180337 | 3.938160550  |
| C  | 7.721508897   | 3.138755124 | 3.452060542  |
| C  | 10.445706749  | 4.126625494 | 0.511356398  |
| C  | 11.620246851  | 3.685436447 | -0.391473682 |
| C  | 12.212255153  | 5.010843404 | -0.879412475 |
| C  | 10.974869778  | 5.860746138 | -1.193457534 |
| C  | 9.913063533   | 5.449988684 | -0.140739763 |
| H  | -0.008445625  | 4.177182207 | -0.339167960 |

|   |               |             |              |
|---|---------------|-------------|--------------|
| H | 0.931042110   | 6.134570258 | -1.387457749 |
| H | 1.478775882   | 4.706812452 | -2.273882920 |
| H | 0.204739769   | 5.729932101 | -2.948176398 |
| H | -1.399271504  | 6.142773507 | -0.283848382 |
| H | -2.141949685  | 5.747389915 | -1.837859016 |
| H | -2.443991803  | 4.723943854 | -0.426670413 |
| H | -1.905167118  | 3.103104797 | -2.324957724 |
| H | -0.235288032  | 3.021166491 | -2.980368050 |
| H | 10.478834710  | 2.001327046 | 3.443274040  |
| H | 10.667843611  | 0.298331273 | 2.987307968  |
| H | 11.719867014  | 1.526723969 | 2.251966366  |
| H | 7.438995743   | 3.515552267 | -1.421119153 |
| H | 8.664546709   | 2.645322141 | -2.380621773 |
| H | 7.137728663   | 1.845164887 | -1.922910831 |
| H | -6.986676887  | 3.252316010 | 1.844995471  |
| H | -8.422288367  | 2.725121535 | 2.769031685  |
| H | -7.080778793  | 1.596385412 | 2.454004901  |
| H | -10.798172604 | 2.405161970 | -2.616713102 |
| H | -10.509600955 | 0.658215658 | -2.732442318 |
| H | -11.691367710 | 1.284951899 | -1.558986219 |
| H | -10.738492392 | 4.505037321 | -0.696057518 |
| H | -11.019604867 | 2.935879060 | 1.901985664  |
| H | -12.174282681 | 3.084919815 | 0.599344489  |
| H | -12.533361661 | 5.469257606 | 1.114776138  |
| H | -12.524900597 | 4.702592181 | 2.700907819  |
| H | -10.205960939 | 5.299380412 | 3.074825790  |
| H | -10.800213428 | 6.744706312 | 2.276920295  |
| H | -8.654101866  | 5.216525402 | 1.334180510  |
| H | -9.607616325  | 6.229037137 | 0.281191965  |
| H | -7.861254118  | 4.798205088 | -1.356703813 |

|   |              |             |              |
|---|--------------|-------------|--------------|
| H | -6.102095089 | 2.455611319 | -0.666085271 |
| H | -5.780762569 | 4.177762873 | -0.578386662 |
| H | -4.588163100 | 3.867173773 | -2.613477163 |
| H | -5.297583221 | 2.270002433 | -2.816059936 |
| H | -6.393669340 | 3.454289795 | -4.604880606 |
| H | -6.498076545 | 4.937121422 | -3.657681780 |
| H | -8.047624754 | 2.356141648 | -3.166523941 |
| H | -8.742044628 | 3.957230639 | -3.439487355 |
| H | 7.992245376  | 4.706037790 | 2.020322093  |
| H | 6.185939110  | 2.598987609 | 0.841613219  |
| H | 6.004853947  | 4.344100296 | 0.889718139  |
| H | 4.548372281  | 3.970388525 | 2.731072252  |
| H | 5.058517886  | 2.290666207 | 2.816632712  |
| H | 6.029432102  | 3.114410077 | 4.855475115  |
| H | 6.380211099  | 4.686905586 | 4.141771169  |
| H | 7.766338497  | 2.048052872 | 3.489687138  |
| H | 8.542293275  | 3.531260765 | 4.056875419  |
| H | 10.870289851 | 4.401249931 | 1.487270257  |
| H | 11.264321924 | 3.101521907 | -1.242811063 |
| H | 12.341181032 | 3.058431707 | 0.133447010  |
| H | 12.796905883 | 5.472786846 | -0.077833205 |
| H | 12.873539180 | 4.891462660 | -1.738850052 |
| H | 10.614403084 | 5.623379984 | -2.197191631 |
| H | 11.178767391 | 6.932019359 | -1.174099372 |
| H | 8.936678786  | 5.328762912 | -0.615531246 |
| H | 9.785900025  | 6.221345549 | 0.619612619  |

**(MgCl<sub>2</sub>)<sub>13</sub>/TiCl<sub>2</sub><sup>i</sup>Bu/DCPDMS-Mg1**

Total atom = 94

|    |             |              |              |
|----|-------------|--------------|--------------|
| CL | 8.923793167 | -4.532349797 | -0.967595858 |
|----|-------------|--------------|--------------|

|    |               |              |              |
|----|---------------|--------------|--------------|
| MG | 7.134576355   | -4.157933478 | 0.352994049  |
| CL | 2.915131501   | -3.768240185 | -1.003634722 |
| MG | 1.127260333   | -3.395012002 | 0.318106456  |
| CL | 5.324076785   | -3.785569917 | 1.644913160  |
| CL | -0.654314364  | -3.021726768 | 1.649530282  |
| CL | -2.845552928  | -3.050594876 | -1.168581786 |
| MG | -4.627074247  | -2.676866260 | 0.162447011  |
| CL | -8.853615724  | -2.282721975 | -1.173362313 |
| MG | -10.635023419 | -1.908976129 | 0.158616045  |
| CL | -6.476333720  | -2.304904810 | 1.397696805  |
| CL | -12.393600353 | -1.535884256 | 1.519671903  |
| CL | 12.262249943  | -2.553638162 | 0.348883377  |
| MG | 10.087829741  | -2.539512856 | -0.102303963 |
| CL | 8.447409775   | -2.403345199 | 1.497841695  |
| MG | 4.324601458   | -2.015922340 | 0.151759078  |
| CL | 6.337968222   | -2.430900959 | -1.342325333 |
| CL | 2.355392968   | -1.481971561 | 1.507403987  |
| MG | -1.532343924  | -1.183546086 | 0.019064892  |
| CL | 0.422250406   | -1.558279408 | -1.342651655 |
| CL | -3.472297408  | -0.756335684 | 1.389075761  |
| MG | -7.411440386  | -0.522845791 | -0.155350230 |
| MG | -13.347043161 | 0.192026314  | 0.049981618  |
| CL | -5.388124136  | -0.846273490 | -1.495674049 |
| CL | -9.485768717  | 0.063138334  | 1.219197137  |
| CL | -11.587171171 | -0.540468277 | -1.673117659 |
| CL | -15.515193674 | 0.152094800  | -0.453772827 |
| CL | 9.404043626   | -0.747319582 | -1.538973248 |
| MG | 7.465949533   | -0.375925582 | -0.115648329 |
| CL | 3.681799260   | -0.110545311 | -1.460122821 |
| CL | 5.607572038   | -0.266790039 | 1.412849413  |



|    |               |             |              |
|----|---------------|-------------|--------------|
| MG | 1.698173423   | 0.261883693 | -0.272951406 |
| CL | -2.215133266  | 0.780513622 | -1.472035066 |
| CL | -0.232227618  | 0.736674557 | 1.342596700  |
| CL | -8.292027427  | 1.327707136 | -1.903473905 |
| CL | -6.335059230  | 1.417936704 | 0.985573065  |
| MG | -10.265312796 | 1.358296609 | -0.733248585 |
| CL | -12.184613116 | 2.363434977 | 0.177290537  |
| TI | -0.949648741  | 2.779067574 | 0.064877428  |
| CL | 1.024467383   | 2.415173253 | -1.317249593 |
| CL | -3.319489797  | 3.286964203 | 0.330111553  |
| C  | -0.341918879  | 5.171208969 | 0.604582410  |
| C  | -1.328224729  | 6.196961602 | 1.173081288  |
| C  | 0.958660916   | 5.826936278 | 0.130491411  |
| O  | 8.462781362   | 1.214051066 | 0.960548078  |
| O  | 7.149825596   | 1.555847945 | -1.028388183 |
| MG | -4.303782634  | 1.052435314 | -0.138769789 |
| C  | -0.115991119  | 3.975663985 | 1.514889788  |
| C  | 6.604563891   | 1.918064257 | -2.306456621 |
| C  | 9.479412507   | 1.150956699 | 1.970571289  |
| C  | 9.350925051   | 3.544489116 | -0.619698764 |
| C  | 10.434128779  | 2.805068003 | -1.440426705 |
| C  | 11.098718522  | 3.924632288 | -2.246884812 |
| C  | 9.915712964   | 4.788890626 | -2.698090846 |
| C  | 8.907627710   | 4.749852635 | -1.522288265 |
| C  | 6.746124982   | 3.631249368 | 1.048902206  |
| C  | 5.222024672   | 3.440994133 | 0.763427925  |
| C  | 4.504701023   | 3.608088015 | 2.129018372  |
| C  | 5.565986293   | 4.152727176 | 3.094371011  |
| C  | 6.864943370   | 3.516432500 | 2.590865494  |
| SI | 7.938281440   | 2.545557010 | 0.081634676  |

|   |              |             |              |
|---|--------------|-------------|--------------|
| H | -0.838859667 | 4.813062172 | -0.358045449 |
| H | -1.558736633 | 6.971070029 | 0.438692593  |
| H | -2.262730128 | 5.728699172 | 1.479421515  |
| H | -0.884106285 | 6.678036889 | 2.046716727  |
| H | 0.761659120  | 6.592294975 | -0.622442091 |
| H | 1.451864644  | 6.305856280 | 0.978721402  |
| H | 1.642665724  | 5.094627130 | -0.296658871 |
| H | 0.922440497  | 3.777582318 | 1.767599529  |
| H | -0.747150340 | 3.959668012 | 2.404626781  |
| H | 6.004792245  | 2.824846899 | -2.222040174 |
| H | 7.410761081  | 2.068318812 | -3.024674003 |
| H | 5.961124453  | 1.108566822 | -2.639043858 |
| H | 9.645557363  | 2.132074824 | 2.415775583  |
| H | 9.148893368  | 0.460578082 | 2.743912584  |
| H | 10.408720557 | 0.788562208 | 1.530598402  |
| H | 9.846417077  | 3.972927399 | 0.262495183  |
| H | 9.987928056  | 2.073857400 | -2.117472190 |
| H | 11.132705814 | 2.254665227 | -0.810182920 |
| H | 11.765813124 | 4.502876088 | -1.599992679 |
| H | 11.694573253 | 3.551813476 | -3.081116514 |
| H | 9.463735744  | 4.349937611 | -3.591017670 |
| H | 10.205156696 | 5.808140282 | -2.956769640 |
| H | 7.886463317  | 4.653316806 | -1.898320600 |
| H | 8.931889893  | 5.677187125 | -0.948767825 |
| H | 7.007190434  | 4.663230557 | 0.788581836  |
| H | 5.006240770  | 2.459560773 | 0.345253967  |
| H | 4.881327698  | 4.181775410 | 0.037699160  |
| H | 3.632044985  | 4.259448259 | 2.061247171  |
| H | 4.158849875  | 2.633925997 | 2.480309142  |
| H | 5.353019645  | 3.912547436 | 4.137336888  |

|   |             |             |             |
|---|-------------|-------------|-------------|
| H | 5.634051050 | 5.242003041 | 3.014782918 |
| H | 6.895801850 | 2.467703696 | 2.895776392 |
| H | 7.758800900 | 4.006036702 | 2.983938540 |

**(MgCl<sub>2</sub>)<sub>13</sub>/TiCl<sub>2</sub><sup>i</sup>Bu/DCPDMS-Mg<sub>4</sub>**

Total atom = 94

|    |               |              |              |
|----|---------------|--------------|--------------|
| CL | -12.406029345 | -1.871232786 | 1.501362818  |
| MG | -10.637884996 | -2.112248001 | 0.122443335  |
| CL | -6.383781139  | -2.507440724 | 1.364127891  |
| MG | -4.617484179  | -2.749404748 | -0.015849003 |
| CL | -8.848725917  | -2.355732758 | -1.228319562 |
| CL | -2.857761428  | -2.991339847 | -1.405190163 |
| CL | -0.607977366  | -3.112852465 | 1.363906991  |
| MG | 1.151912001   | -3.354307035 | -0.025328765 |
| CL | 5.412707212   | -3.749954754 | 1.194959937  |
| MG | 7.172858819   | -3.991297377 | -0.194667143 |
| CL | 2.981579310   | -3.599106532 | -1.320309802 |
| CL | 8.908547737   | -4.232513949 | -1.613411158 |
| CL | -15.267890000 | 0.607816084  | -0.066814037 |
| MG | -13.127258437 | 0.187916269  | 0.356116350  |
| CL | -11.571216326 | -0.288204437 | -1.261792372 |
| MG | -7.412139164  | -0.665799595 | -0.028171777 |
| CL | -9.400258053  | -0.385817939 | 1.529040489  |
| CL | -5.434359177  | -0.798807281 | -1.468753132 |
| MG | -1.517888682  | -1.186992410 | -0.079709530 |
| CL | -3.445062462  | -0.902373893 | 1.341618918  |
| CL | 0.406564336   | -1.418784451 | -1.517059472 |
| MG | 4.360092645   | -1.873032390 | -0.062686974 |
| MG | 10.290948617  | -2.575017082 | -0.431464410 |
| CL | 2.377277094   | -1.526411184 | 1.329665429  |

|    |               |              |              |
|----|---------------|--------------|--------------|
| CL | 6.451838381   | -1.983459818 | -1.530232842 |
| CL | 8.487678769   | -2.626920561 | 1.399807243  |
| CL | 12.413428774  | -3.037055671 | 0.052573993  |
| CL | -11.923246087 | 2.273933086  | 1.051642120  |
| MG | -10.090538704 | 1.372380692  | -0.043664234 |
| CL | -6.339546810  | 1.227289016  | 1.263970676  |
| CL | -8.321389024  | 1.339160521  | -1.504410369 |
| MG | -4.331027365  | 1.006064179  | 0.062331034  |
| CL | -0.365528288  | 0.747115880  | 1.118860262  |
| CL | -2.424643023  | 0.791902421  | -1.627383092 |
| CL | 5.597945991   | -0.295937754 | 1.455076102  |
| CL | 3.663955343   | 0.116116872  | -1.492851027 |
| MG | 7.636388025   | -0.343893371 | 0.163293314  |
| CL | 9.653340445   | -0.448667105 | -1.252034311 |
| TI | -1.201763465  | 2.764064459  | -0.637590630 |
| CL | -3.150862355  | 3.044498323  | 0.807178576  |
| CL | 1.210284574   | 2.695706999  | -0.970460357 |
| C  | -1.314307575  | 5.134045927  | -1.504428515 |
| C  | -0.151174465  | 5.835196467  | -2.214174064 |
| C  | -2.429659753  | 6.112663283  | -1.123886851 |
| O  | 7.392456002   | 1.708004335  | -0.504842236 |
| O  | 8.528924624   | 1.077148192  | 1.517433574  |
| MG | 1.684944516   | 0.340527319  | -0.250525649 |
| C  | -1.819458907  | 3.902775547  | -2.236048706 |
| C  | 9.423589308   | 0.880734269  | 2.620145857  |
| C  | 6.883812551   | 2.226167606  | -1.742681997 |
| SI | 8.060816343   | 2.527027517  | 0.799779417  |
| C  | 6.777435962   | 3.473878907  | 1.797745759  |
| C  | 5.315090513   | 3.462541194  | 1.248783535  |
| C  | 4.387447121   | 3.456089309  | 2.493482331  |

|   |              |              |              |
|---|--------------|--------------|--------------|
| C | 5.305090655  | 3.690093559  | 3.701712466  |
| C | 6.629227984  | 3.045432886  | 3.279983622  |
| C | 9.526537465  | 3.608449856  | 0.385088226  |
| C | 10.671171394 | 3.000819201  | -0.457961876 |
| C | 11.414479602 | 4.229653710  | -0.989746043 |
| C | 10.283886433 | 5.188533140  | -1.381995965 |
| C | 9.160721321  | 4.950438055  | -0.340181995 |
| H | -0.872807563 | 4.811456934  | -0.502199001 |
| H | 0.262899452  | 6.634316709  | -1.596260119 |
| H | 0.651011188  | 5.138422512  | -2.454396169 |
| H | -0.511046197 | 6.277225106  | -3.145260889 |
| H | -2.050198373 | 6.914617426  | -0.488069713 |
| H | -2.838803185 | 6.563603157  | -2.030109883 |
| H | -3.239308422 | 5.611481651  | -0.595006185 |
| H | -2.884070875 | 3.900925592  | -2.455087788 |
| H | -1.236661555 | 3.628466082  | -3.116769190 |
| H | 9.223085095  | 1.602508704  | 3.411937506  |
| H | 9.262712620  | -0.123069500 | 3.006808146  |
| H | 10.456918898 | 0.976700237  | 2.284867115  |
| H | 6.531560854  | 3.250224745  | -1.617502204 |
| H | 7.669878209  | 2.196582585  | -2.497300152 |
| H | 6.047267536  | 1.604724109  | -2.053928055 |
| H | 7.120846911  | 4.514780649  | 1.803746436  |
| H | 5.120522544  | 2.582531813  | 0.638760259  |
| H | 5.139168974  | 4.337168178  | 0.619868450  |
| H | 3.594902406  | 4.202093167  | 2.421878153  |
| H | 3.907337186  | 2.480116288  | 2.584539871  |
| H | 4.904253387  | 3.268066900  | 4.624719489  |
| H | 5.453782407  | 4.761400754  | 3.867937963  |
| H | 6.547693926  | 1.959001940  | 3.357693524  |

|   |              |             |              |
|---|--------------|-------------|--------------|
| H | 7.470896914  | 3.365980436 | 3.898295567  |
| H | 9.950284415  | 3.880067811 | 1.362165422  |
| H | 10.278505761 | 2.414763220 | -1.291394851 |
| H | 11.307044606 | 2.329487283 | 0.119554123  |
| H | 12.024494104 | 4.667314496 | -0.193450707 |
| H | 12.081010261 | 3.997387098 | -1.821559586 |
| H | 9.922832247  | 4.936971750 | -2.382070003 |
| H | 10.601528843 | 6.231477119 | -1.411720684 |
| H | 8.186749145  | 4.917928035 | -0.833833110 |
| H | 9.106805329  | 5.766688948 | 0.380998602  |

#### **2Al/(MgCl<sub>2</sub>)<sub>13</sub>/TiCl<sub>2</sub><sup>i</sup>Bu cluster 4**

Total atom = 87

|    |               |              |              |
|----|---------------|--------------|--------------|
| CL | 10.760741798  | -3.049461950 | -1.794679877 |
| MG | 9.002512638   | -3.126133945 | -0.384994630 |
| CL | 4.708548174   | -3.029659464 | -1.552211965 |
| MG | 2.950281544   | -3.106360464 | -0.143525589 |
| CL | 7.219093860   | -3.200769604 | 0.993540427  |
| CL | 1.198467840   | -3.185703585 | 1.277008931  |
| CL | -1.097761319  | -3.001303097 | -1.450363025 |
| MG | -2.848688127  | -3.080731802 | -0.032862663 |
| CL | -7.147786571  | -2.983598797 | -1.176880694 |
| MG | -8.897749033  | -3.064054657 | 0.239612200  |
| CL | -4.673147699  | -3.154019631 | 1.292110944  |
| CL | -10.627520906 | -3.145554413 | 1.687413984  |
| CL | 13.902451994  | -0.929551202 | -0.235131899 |
| MG | 11.723533999  | -1.101380387 | -0.624943680 |
| CL | 10.150367508  | -1.442102693 | 1.012721792  |
| MG | 5.945020115   | -1.331956961 | -0.139195284 |
| CL | 7.914691099   | -1.281735095 | -1.755267562 |

|    |               |              |              |
|----|---------------|--------------|--------------|
| CL | 4.010578142   | -1.287643563 | 1.352675707  |
| MG | 0.044470339   | -1.209515696 | 0.041544476  |
| CL | 1.970852145   | -1.067065301 | -1.391375199 |
| CL | -1.877205908  | -1.290319066 | 1.495523477  |
| MG | -5.882742226  | -1.256980222 | 0.092065023  |
| MG | -11.841986037 | -1.326230340 | 0.567894987  |
| CL | -3.886677623  | -1.091831510 | -1.323104015 |
| CL | -7.957905334  | -1.179679099 | 1.595264652  |
| CL | -10.084544663 | -1.534936320 | -1.299997994 |
| CL | -14.011267190 | -1.546936779 | 0.113066777  |
| CL | 10.817263722  | 1.006711183  | -1.470958366 |
| MG | 8.852718399   | 0.499203178  | -0.334526966 |
| CL | 5.191237520   | 0.690810860  | -1.290674186 |
| CL | 7.316966786   | 0.482387556  | 1.523256569  |
| MG | 3.185599142   | 0.814871788  | 0.065317224  |
| CL | -1.011168377  | 0.901240174  | -1.213465129 |
| CL | 1.120207626   | 0.724043414  | 1.551146123  |
| MG | -3.077143035  | 0.837783893  | 0.225395515  |
| CL | -7.214882616  | 0.646571028  | -1.549530196 |
| CL | -5.127266746  | 0.608950491  | 1.467133109  |
| MG | -9.010766688  | 0.416943515  | 0.040885731  |
| CL | -11.037417600 | 0.883491561  | 1.134480160  |
| TI | 0.083553349   | 2.662523161  | 0.321318801  |
| CL | 2.093763414   | 2.648095542  | -1.110836844 |
| CL | -1.972709138  | 2.458941033  | 1.690941558  |
| C  | 0.195745834   | 4.707935456  | 0.627144639  |
| C  | -0.653700704  | 4.912526026  | -0.613653731 |
| C  | -1.999926976  | 5.583819717  | -0.322974721 |
| C  | 0.087577026   | 5.604757452  | -1.762510101 |
| CL | 4.210346650   | 2.318731035  | 1.934953248  |

|    |              |             |              |
|----|--------------|-------------|--------------|
| CL | -4.099445137 | 2.548516141 | -1.496357634 |
| AL | 6.399554794  | 2.732980708 | 1.868652947  |
| C  | 7.053503899  | 3.142675304 | 3.670257698  |
| C  | 6.957661107  | 3.689891710 | 0.229216288  |
| C  | 6.507380323  | 4.451073549 | 4.273022237  |
| C  | 8.034495026  | 3.038759695 | -0.642761985 |
| AL | -6.297596409 | 2.923786059 | -1.552975096 |
| C  | -6.813800582 | 3.535878755 | -3.343363893 |
| C  | -7.011248957 | 3.670698714 | 0.132825203  |
| C  | -8.177205649 | 2.926857555 | 0.790624708  |
| C  | -6.238468764 | 4.904586953 | -3.753444021 |
| H  | -0.278961088 | 5.016677876 | 1.556808994  |
| H  | 1.214836264  | 5.081706316 | 0.548397741  |
| H  | -0.935099771 | 3.890336570 | -1.036159994 |
| H  | -2.632283564 | 5.597711037 | -1.212145065 |
| H  | -2.537124071 | 5.068058264 | 0.471680736  |
| H  | -1.826641866 | 6.615703172 | -0.009455925 |
| H  | -0.518507299 | 5.612347649 | -2.670696919 |
| H  | 0.298221770  | 6.640255450 | -1.486196573 |
| H  | 1.032583742  | 5.111743313 | -1.986540671 |
| H  | 8.149431741  | 3.182242133 | 3.641590777  |
| H  | 6.810157410  | 2.304542922 | 4.331658705  |
| H  | 6.076540391  | 3.887703750 | -0.386104638 |
| H  | 7.324314779  | 4.670698884 | 0.554088499  |
| H  | 6.911805697  | 4.637517545 | 5.271542214  |
| H  | 6.760064351  | 5.320138438 | 3.659206323  |
| H  | 5.419095225  | 4.426497749 | 4.365558329  |
| H  | 8.936401921  | 2.801127196 | -0.058222264 |
| H  | 7.613375969  | 2.153105466 | -1.148922173 |
| H  | 8.393316562  | 3.673180168 | -1.456241281 |



|   |              |             |              |
|---|--------------|-------------|--------------|
| H | -6.512271929 | 2.777944401 | -4.073979034 |
| H | -7.909268147 | 3.569686201 | -3.394715123 |
| H | -6.199288076 | 3.764537349 | 0.857838357  |
| H | -7.334758035 | 4.693742119 | -0.092491245 |
| H | -9.005002151 | 2.771381014 | 0.080875746  |
| H | -7.819915922 | 1.978637926 | 1.221861390  |
| H | -8.628868802 | 3.462317829 | 1.628693509  |
| H | -6.542174187 | 5.698493167 | -3.065399724 |
| H | -5.146154418 | 4.890789510 | -3.769126102 |
| H | -6.571074554 | 5.202918652 | -4.751369061 |

**(MgCl<sub>2</sub>)<sub>13</sub>/TiCl<sub>2</sub><sup>i</sup>Bu/AlEt<sub>2</sub>Cl-Mg<sub>2</sub>**

Total atom = 71

|    |               |              |              |
|----|---------------|--------------|--------------|
| CL | 10.150700678  | -3.366064538 | -1.357236921 |
| MG | 8.367206968   | -3.217056021 | 0.014431862  |
| CL | 4.101533291   | -3.077722764 | -1.248027510 |
| MG | 2.318076639   | -2.928921536 | 0.122665302  |
| CL | 6.559196012   | -3.068437740 | 1.354401454  |
| CL | 0.540567768   | -2.781620308 | 1.505431803  |
| CL | -1.699406691  | -2.806278432 | -1.274366872 |
| MG | -3.475945994  | -2.659504201 | 0.105518089  |
| CL | -7.747093547  | -2.516706602 | -1.134050060 |
| MG | -9.522598166  | -2.371191447 | 0.244847843  |
| CL | -5.323903903  | -2.513674746 | 1.391260076  |
| CL | -11.278517044 | -2.223911592 | 1.655593979  |
| CL | 13.352039862  | -1.215007088 | 0.028825039  |
| MG | 11.174657909  | -1.341248362 | -0.386544059 |
| CL | 9.561101243   | -1.436977810 | 1.244433176  |
| MG | 5.384103872   | -1.285956303 | -0.002549270 |
| CL | 7.381349265   | -1.492310700 | -1.571775469 |

|    |               |              |              |
|----|---------------|--------------|--------------|
| CL | 3.428201676   | -1.000823067 | 1.433852490  |
| MG | -0.508184227  | -0.908561369 | 0.037378590  |
| CL | 1.446462244   | -1.001461101 | -1.360893630 |
| CL | -2.455857788  | -0.752298391 | 1.449992278  |
| MG | -6.432203904  | -0.713474643 | -0.034448431 |
| MG | -12.396231104 | -0.491339587 | 0.318695518  |
| CL | -4.407040900  | -0.784207727 | -1.415627677 |
| CL | -8.527372918  | -0.388228392 | 1.406861071  |
| CL | -10.617714145 | -0.974118594 | -1.477331837 |
| CL | -14.564840308 | -0.673900787 | -0.155912165 |
| CL | 10.374860161  | 0.701915005  | -1.468079542 |
| MG | 8.371954639   | 0.391649327  | -0.330626812 |
| CL | 4.726405374   | 0.615774493  | -1.398886930 |
| CL | 6.785244921   | 0.651124162  | 1.469533451  |
| MG | 2.701345274   | 0.982082253  | -0.122674654 |
| CL | -1.568245097  | 1.066940945  | -1.524185396 |
| CL | 0.550386229   | 1.192438361  | 1.253180466  |
| MG | -3.482165596  | 1.095803719  | 0.124953642  |
| CL | -7.493420487  | 1.162092065  | -1.652796024 |
| CL | -5.540541611  | 1.224884864  | 1.237027804  |
| MG | -9.435123038  | 0.967527785  | -0.445608189 |
| CL | -11.408353214 | 1.757577129  | 0.556168430  |
| TI | -0.366008044  | 2.982056839  | -0.312747771 |
| CL | 1.709415460   | 2.671558382  | -1.592967008 |
| CL | -2.468182410  | 3.112094192  | 1.014313292  |
| C  | -0.253789450  | 5.049115934  | -0.419274956 |
| C  | -1.031289327  | 4.979385762  | -1.719017128 |
| C  | -2.406226505  | 5.652995534  | -1.651503181 |
| C  | -0.231989506  | 5.439193579  | -2.943006058 |
| CL | 3.727682181   | 2.643875942  | 1.573118356  |

|    |              |             |              |
|----|--------------|-------------|--------------|
| AL | 5.940754260  | 2.959338725 | 1.521559726  |
| C  | 6.558246509  | 3.552882620 | 3.283454627  |
| C  | 6.574369263  | 3.694370595 | -0.201812618 |
| C  | 6.051502698  | 4.943535539 | 3.709872280  |
| C  | 7.654604943  | 2.913744195 | -0.954260323 |
| H  | -0.776396509 | 5.540619506 | 0.398719411  |
| H  | 0.770535900  | 5.402814036 | -0.518323636 |
| H  | -1.269374563 | 3.884344313 | -1.941083033 |
| H  | -2.984690193 | 5.457333396 | -2.556637849 |
| H  | -2.980137001 | 5.305980043 | -0.793399378 |
| H  | -2.276094826 | 6.733301859 | -1.560688428 |
| H  | -0.782250677 | 5.246317665 | -3.865925450 |
| H  | -0.051190265 | 6.513875547 | -2.874253446 |
| H  | 0.730600356  | 4.933791914 | -3.007177210 |
| H  | 7.655113429  | 3.545782467 | 3.285499097  |
| H  | 6.262034974  | 2.808889058 | 4.030103434  |
| H  | 5.718702913  | 3.842871753 | -0.864787668 |
| H  | 6.962189645  | 4.696188626 | 0.016814772  |
| H  | 6.436243059  | 5.231767271 | 4.691630026  |
| H  | 6.356859365  | 5.723225048 | 3.006714852  |
| H  | 4.961191292  | 4.972652514 | 3.770516408  |
| H  | 8.528653315  | 2.715609647 | -0.315601314 |
| H  | 7.219205463  | 1.989516064 | -1.371002413 |
| H  | 8.060727970  | 3.438479849 | -1.821686721 |

**(MgCl<sub>2</sub>)<sub>13</sub>/TiCl<sub>2</sub><sup>i</sup>Bu/AlEt<sub>2</sub>Cl-Mg<sub>3</sub>**

Total atom = 71

|    |               |              |             |
|----|---------------|--------------|-------------|
| CL | -11.421836538 | -2.139071544 | 1.695532777 |
| MG | -9.638446335  | -2.451663849 | 0.351529754 |
| CL | -5.370007708  | -2.376455531 | 1.610390277 |

|    |               |              |              |
|----|---------------|--------------|--------------|
| MG | -3.586598614  | -2.688985149 | 0.267491820  |
| CL | -7.830512004  | -2.759390678 | -0.961075567 |
| CL | -1.809461949  | -3.005267971 | -1.087139033 |
| CL | 0.433583507   | -2.579064201 | 1.657425698  |
| MG | 2.209839760   | -2.895093119 | 0.305895052  |
| CL | 6.483881477   | -2.822184339 | 1.541747871  |
| MG | 8.258999215   | -3.139092326 | 0.191287143  |
| CL | 4.057706915   | -3.196557477 | -0.952664801 |
| CL | 10.014579261  | -3.459974739 | -1.190706258 |
| CL | -14.441077926 | -0.106535274 | -0.188487111 |
| MG | -12.279639758 | -0.311725102 | 0.275897592  |
| CL | -10.686995109 | -0.906961350 | -1.267472839 |
| MG | -6.506078230  | -0.817015558 | -0.028075104 |
| CL | -8.506318711  | -0.497368199 | 1.518658418  |
| CL | -4.539824565  | -1.025449414 | -1.462950897 |
| MG | -0.603033779  | -0.939053353 | -0.067924075 |
| CL | -2.552249913  | -0.552066085 | 1.286792260  |
| CL | 1.344431664   | -1.267221030 | -1.451043705 |
| MG | 5.316968774   | -1.215278767 | 0.042217210  |
| MG | 11.277472184  | -1.565616600 | -0.266129344 |
| CL | 3.299293275   | -0.805340945 | 1.374841132  |
| CL | 7.425380178   | -1.398463212 | -1.404689842 |
| CL | 9.473510437   | -1.480813425 | 1.566791167  |
| CL | 13.425858148  | -1.811321371 | 0.268337877  |
| CL | -11.211756127 | 1.911956644  | 0.696768721  |
| MG | -9.314866030  | 0.990298906  | -0.266075648 |
| CL | -5.607625803  | 1.271436782  | 1.006828147  |
| CL | -7.564108691  | 0.885142202  | -1.748639589 |
| MG | -3.625945871  | 1.063480529  | -0.253248502 |
| CL | 0.427103359   | 1.313988397  | 0.848826917  |

|    |              |             |              |
|----|--------------|-------------|--------------|
| CL | -1.682668336 | 0.811870333 | -1.898498758 |
| MG | 2.581532648  | 0.939358180 | -0.453144082 |
| CL | 6.668198695  | 0.823623804 | 1.463011175  |
| CL | 4.657823320  | 0.482134616 | -1.581134970 |
| MG | 8.507420088  | 0.331670518 | -0.021556227 |
| CL | 10.572648796 | 0.590928135 | -1.109403382 |
| TI | -0.523578783 | 2.863229847 | -1.010957347 |
| CL | -2.669587102 | 3.235129485 | 0.184060240  |
| CL | 1.571872690  | 2.333516034 | -2.208327901 |
| C  | -0.484030098 | 4.836540707 | -1.637403397 |
| C  | 0.315679335  | 5.180354947 | -0.395053747 |
| C  | 1.714529770  | 5.723175252 | -0.704481307 |
| C  | -0.434435737 | 6.076692529 | 0.595904770  |
| CL | 3.605949585  | 2.817106177 | 1.048894612  |
| AL | 5.823269082  | 3.110440990 | 1.143097617  |
| C  | 6.292329405  | 3.926678488 | 2.862693214  |
| C  | 6.619362960  | 3.611543737 | -0.595052588 |
| C  | 7.783039482  | 2.757489784 | -1.105846292 |
| C  | 5.751144162  | 5.352803370 | 3.074270292  |
| H  | 0.059227289  | 4.956247652 | -2.572930161 |
| H  | -1.474051352 | 5.285120018 | -1.682840249 |
| H  | 0.512645364  | 4.218502453 | 0.189372040  |
| H  | 2.303879111  | 5.833186176 | 0.206999026  |
| H  | 2.253987637  | 5.066045095 | -1.384865872 |
| H  | 1.622460556  | 6.705082914 | -1.173483087 |
| H  | 0.129813014  | 6.191104989 | 1.523350233  |
| H  | -0.570517995 | 7.067369130 | 0.157257443  |
| H  | -1.416579783 | 5.675180115 | 0.841409697  |
| H  | 5.938812234  | 3.276298751 | 3.669436489  |
| H  | 7.385659782  | 3.932948701 | 2.953097464  |

|   |             |             |              |
|---|-------------|-------------|--------------|
| H | 5.837584431 | 3.634538817 | -1.357734988 |
| H | 6.967227039 | 4.645753962 | -0.488670357 |
| H | 8.578501947 | 2.668088362 | -0.349427796 |
| H | 7.410735046 | 1.773040369 | -1.429191685 |
| H | 8.282804242 | 3.169514034 | -1.985171378 |
| H | 6.107590063 | 6.043934515 | 2.305541489  |
| H | 4.659297062 | 5.374987581 | 3.047570523  |
| H | 6.057511027 | 5.764643361 | 4.039466242  |

### **2Al/2DIBP/(MgCl<sub>2</sub>)<sub>13</sub>TiCl<sub>2</sub><sup>i</sup>Bu cluster 6**

Total atom = 171

|    |               |              |              |
|----|---------------|--------------|--------------|
| CL | 10.815819228  | -3.902748438 | -1.937793061 |
| MG | 9.063198075   | -4.034634930 | -0.525862144 |
| CL | 4.764681069   | -3.885310235 | -1.670452221 |
| MG | 3.011872756   | -4.017122405 | -0.258798554 |
| CL | 7.285027039   | -4.163504987 | 0.856149515  |
| CL | 1.265644675   | -4.152325980 | 1.164106489  |
| CL | -1.041118097  | -3.853658222 | -1.544171745 |
| MG | -2.786593307  | -3.988668854 | -0.124128169 |
| CL | -7.089890691  | -3.839438109 | -1.245651003 |
| MG | -8.834698123  | -3.975349601 | 0.172567483  |
| CL | -4.605781588  | -4.113692847 | 1.204165473  |
| CL | -10.558681064 | -4.113899501 | 1.623413381  |
| CL | 13.966647355  | -1.852385523 | -0.305250175 |
| MG | 11.786417742  | -2.005040731 | -0.693909028 |
| CL | 10.218777130  | -2.410724874 | 0.935516561  |
| MG | 6.009566797   | -2.247320065 | -0.194611637 |
| CL | 7.971930165   | -2.134934502 | -1.813959435 |
| CL | 4.080754812   | -2.262691096 | 1.305798922  |
| MG | 0.109561358   | -2.125787349 | 0.015040309  |

|    |               |              |              |
|----|---------------|--------------|--------------|
| CL | 2.030462690   | -1.927425695 | -1.418400326 |
| CL | -1.806432078  | -2.263478575 | 1.472300126  |
| MG | -5.817485547  | -2.168556239 | 0.087557744  |
| MG | -11.774599844 | -2.249198114 | 0.584543826  |
| CL | -3.826751059  | -1.947420462 | -1.327812357 |
| CL | -7.886573862  | -2.149061167 | 1.600762155  |
| CL | -10.025034000 | -2.383328423 | -1.297811704 |
| CL | -13.946316111 | -2.448083516 | 0.129085660  |
| CL | 10.925570061  | -0.102687360 | -1.854715293 |
| MG | 8.964762580   | -0.156106295 | -0.412101088 |
| CL | 5.149480358   | -0.239711652 | -1.358851970 |
| CL | 7.293288867   | -0.639761224 | 1.440907875  |
| MG | 3.265556188   | -0.096379430 | 0.114748890  |
| CL | -0.955680089  | 0.052865926  | -1.145625151 |
| CL | 1.199448982   | -0.238687780 | 1.598899955  |
| MG | -3.022299025  | -0.080512002 | 0.296250795  |
| CL | -7.022640285  | -0.357995066 | -1.447198001 |
| CL | -4.964562567  | -0.453203741 | 1.636214310  |
| MG | -9.000360581  | -0.255709874 | 0.133066668  |
| CL | -10.984016867 | -0.286267635 | 1.624150768  |
| TI | 0.147976592   | 1.732540262  | 0.452668824  |
| CL | 2.146472894   | 1.794765064  | -0.987452299 |
| CL | -1.892876231  | 1.485119116  | 1.831589782  |
| C  | 0.249131455   | 3.772349700  | 0.826333524  |
| C  | -0.624162811  | 4.017477874  | -0.391208179 |
| O  | -9.973858192  | 1.136262745  | -1.013691366 |
| C  | -10.528843419 | 2.213654073  | -0.839719818 |
| C  | -8.306433054  | 2.529813899  | 1.417358906  |
| O  | -8.323040586  | 1.336425411  | 1.154693795  |
| O  | 9.866509981   | 1.243100523  | 0.785385405  |

|   |               |             |              |
|---|---------------|-------------|--------------|
| C | 10.239530287  | 2.406088114 | 0.700133435  |
| C | 7.920367422   | 2.610337831 | -1.448728857 |
| O | 8.152651466   | 1.414537234 | -1.345536019 |
| O | -11.804512103 | 2.393337166 | -1.092398729 |
| C | -12.577400300 | 1.262710055 | -1.620102628 |
| O | -7.777989123  | 2.974175616 | 2.534680046  |
| C | -7.170677075  | 1.989603632 | 3.439471104  |
| O | 11.486007081  | 2.761312410 | 0.900371652  |
| O | 7.314659892   | 3.101921997 | -2.504836035 |
| C | 12.457854400  | 1.721797858 | 1.269962045  |
| C | 6.886108280   | 2.167846321 | -3.553154961 |
| C | -1.965688642  | 4.675328908 | -0.052543003 |
| C | 0.095434202   | 4.752559381 | -1.526835954 |
| C | 9.340412738   | 3.585640650 | 0.474809398  |
| C | 8.265800039   | 3.660937626 | -0.441693520 |
| C | 9.593720401   | 4.681121100 | 1.304126342  |
| C | 7.480002040   | 4.817284734 | -0.457964546 |
| C | 7.718896456   | 5.873377698 | 0.406985816  |
| C | 8.787412189   | 5.808903302 | 1.286848046  |
| C | -8.836419377  | 3.628567107 | 0.549267078  |
| C | -9.850521691  | 3.487318478 | -0.428426014 |
| C | -10.268084202 | 4.621518957 | -1.129955961 |
| C | -8.284970058  | 4.896611621 | 0.759128272  |
| C | -8.686264398  | 6.000580313 | 0.023766581  |
| C | -9.686963876  | 5.863266766 | -0.924023487 |
| C | 13.836697942  | 2.353540161 | 1.335748255  |
| C | 5.934595328   | 2.894697696 | -4.486027118 |
| C | 6.600566488   | 4.071831015 | -5.200689642 |
| C | 5.359454437   | 1.880060437 | -5.480279464 |
| C | 14.317031693  | 2.800073663 | -0.047004486 |



|    |               |              |              |
|----|---------------|--------------|--------------|
| C  | 14.806855334  | 1.349737319  | 1.969969377  |
| C  | -14.025573913 | 1.693031262  | -1.769932502 |
| C  | -6.493483711  | 2.734227052  | 4.575323684  |
| C  | -14.786222723 | 0.596193981  | -2.524592403 |
| C  | -14.671866356 | 1.988217495  | -0.414348817 |
| C  | -5.705583451  | 1.724938825  | 5.417832185  |
| C  | -7.487659654  | 3.527787432  | 5.425268816  |
| CL | 4.386034901   | 1.442335738  | 1.863379842  |
| CL | -4.134757240  | 1.775786443  | -1.157257298 |
| AL | 6.110237641   | 0.651451754  | 3.099778735  |
| AL | -5.719344910  | 1.240017442  | -2.686194460 |
| C  | 7.297445182   | 2.171104252  | 3.497110407  |
| C  | 6.772807674   | 3.120115589  | 4.590163707  |
| C  | 5.545310819   | -0.685178480 | 4.422739793  |
| C  | 4.344437356   | -0.287255425 | 5.299925570  |
| C  | -6.896984137  | 2.805807454  | -2.895387389 |
| C  | -4.994776124  | 0.209104179  | -4.192654501 |
| C  | -3.728249808  | 0.787470760  | -4.849479884 |
| C  | -6.298816586  | 3.944481553  | -3.741460395 |
| H  | -0.211381403  | 4.043742755  | 1.774451038  |
| H  | 1.263442902   | 4.157651067  | 0.745053180  |
| H  | -0.912024251  | 3.012988960  | -0.844429430 |
| H  | -2.615587209  | 4.718142831  | -0.927890247 |
| H  | -2.487567746  | 4.127672724  | 0.730713002  |
| H  | -1.788246894  | 5.695452039  | 0.296214957  |
| H  | -0.526899052  | 4.793629480  | -2.423163677 |
| H  | 0.312922893   | 5.777326728  | -1.216991623 |
| H  | 1.035075737   | 4.266157483  | -1.785308432 |
| H  | 7.787129385   | 1.827660690  | -4.067792034 |
| H  | 6.409450086   | 1.319242870  | -3.070048026 |

|   |               |             |              |
|---|---------------|-------------|--------------|
| H | 12.142592017  | 1.316244754 | 2.231823815  |
| H | 12.414548354  | 0.936154918 | 0.518651239  |
| H | -7.969861823  | 1.336858146 | 3.795430204  |
| H | -6.466351325  | 1.395795832 | 2.861022015  |
| H | -12.128356838 | 0.978780855 | -2.572168861 |
| H | -12.480601550 | 0.435286803 | -0.920396905 |
| H | 7.075948730   | 6.743181224 | 0.383402386  |
| H | 8.997180333   | 6.628934555 | 1.960860939  |
| H | 6.664310302   | 4.877624591 | -1.161715900 |
| H | 10.428240627  | 4.631913676 | 1.987406262  |
| H | -11.055390038 | 4.517305924 | -1.861152155 |
| H | -8.220412475  | 6.961156585 | 0.199338688  |
| H | -10.020066774 | 6.714585821 | -1.502886112 |
| H | -7.519886586  | 5.007969142 | 1.511484074  |
| H | 13.768159148  | 3.231073904 | 1.988794621  |
| H | 5.108929599   | 3.272103177 | -3.873314264 |
| H | 7.419517479   | 3.726291912 | -5.837924374 |
| H | 5.882164365   | 4.591270512 | -5.837341803 |
| H | 7.007534452   | 4.796741152 | -4.494445816 |
| H | 4.641141899   | 2.363955767 | -6.143492447 |
| H | 6.147234363   | 1.448446594 | -6.103592236 |
| H | 4.847906233   | 1.063985375 | -4.967667175 |
| H | 14.419683882  | 1.938647322 | -0.711062496 |
| H | 13.623479934  | 3.505612683 | -0.507200561 |
| H | 15.291353602  | 3.286524848 | 0.024870873  |
| H | 15.809028411  | 1.777962620 | 2.022579101  |
| H | 14.502989624  | 1.085022388 | 2.985325227  |
| H | 14.861317755  | 0.430716967 | 1.382631470  |
| H | -14.037895588 | 2.605563533 | -2.376856335 |
| H | -5.778028046  | 3.431762619 | 4.126215731  |

|   |               |              |              |
|---|---------------|--------------|--------------|
| H | -14.767598603 | -0.345228842 | -1.971046353 |
| H | -15.829612444 | 0.886002580  | -2.657353795 |
| H | -14.360443046 | 0.418861414  | -3.514842186 |
| H | -14.123233052 | 2.752982773  | 0.137310724  |
| H | -15.695681979 | 2.341482053  | -0.548950328 |
| H | -14.707498754 | 1.083244152  | 0.196612770  |
| H | -5.180078759  | 2.234878595  | 6.226485816  |
| H | -6.371331774  | 0.985040622  | 5.869955140  |
| H | -4.967020997  | 1.191412091  | 4.817974950  |
| H | -8.207859391  | 2.859362987  | 5.905359304  |
| H | -6.968163101  | 4.075855062  | 6.213302059  |
| H | -8.046011928  | 4.249647208  | 4.827526436  |
| H | 8.273819187   | 1.770934022  | 3.796047177  |
| H | 7.476118198   | 2.737423715  | 2.578403238  |
| H | 7.463578396   | 3.945882978  | 4.788344372  |
| H | 5.814066958   | 3.564536854  | 4.311021495  |
| H | 6.620245733   | 2.599852909  | 5.539138551  |
| H | 5.327705458   | -1.628076023 | 3.914890774  |
| H | 6.415389093   | -0.889920464 | 5.059712079  |
| H | 4.107373415   | -1.059054022 | 6.037891208  |
| H | 4.527686297   | 0.638027434  | 5.853180653  |
| H | 3.446597372   | -0.129655927 | 4.698909157  |
| H | -7.833065971  | 2.463404402  | -3.353077974 |
| H | -7.172603544  | 3.190640521  | -1.909002043 |
| H | -4.799270554  | -0.815647779 | -3.867423068 |
| H | -5.794809466  | 0.131618902  | -4.940205624 |
| H | -2.895898336  | 0.827020840  | -4.143899974 |
| H | -3.400514077  | 0.183714633  | -5.700730421 |
| H | -3.884842877  | 1.804190997  | -5.220747155 |
| H | -6.046051011  | 3.609018107  | -4.750473317 |

H -6.988914036 4.787230851 -3.849608520  
H -5.381251238 4.337565389 -3.296186228

**2Al/DIBP/(MgCl<sub>2</sub>)<sub>13</sub>TiCl<sub>2</sub><sup>i</sup>Bu cluster 7**

Total atom = 129

CL -8.993778889 -4.178545288 2.208706808  
MG -7.230491909 -4.262965000 0.805541636  
CL -2.966287529 -3.645144100 1.924829399  
MG -1.203706984 -3.730683705 0.522011674  
CL -5.442400974 -4.338723456 -0.566181411  
CL 0.553974583 -3.818443636 -0.890583983  
CL 2.813913742 -3.110352638 1.780573198  
MG 4.570306567 -3.198809866 0.370315113  
CL 8.838949848 -2.583649239 1.465883072  
MG 10.594477348 -2.673115094 0.056865948  
CL 6.398970530 -3.263707260 -0.949212408  
CL 12.330083979 -2.768982619 -1.383101675  
CL -12.307113834 -2.546456208 0.432594631  
MG -10.121446927 -2.475391161 0.825780163  
CL -8.519178242 -2.865459053 -0.771974319  
MG -4.345059419 -2.243125644 0.330850608  
CL -6.321761012 -2.182270019 1.942758958  
CL -2.417645144 -2.201354767 -1.169744938  
MG 1.521384558 -1.615658853 0.096765915  
CL -0.415652507 -1.479125514 1.516282249  
CL 3.448133551 -1.694472740 -1.350887956  
MG 7.429076638 -1.138225267 0.011777917  
MG 13.372254212 -0.729285182 -0.493130280  
CL 5.420965654 -0.987225176 1.411192121  
CL 9.494597876 -1.052769495 -1.504260771

|    |               |              |              |
|----|---------------|--------------|--------------|
| CL | 11.633515699  | -0.873569593 | 1.398236322  |
| CL | 15.550858616  | -0.700162439 | -0.030170101 |
| CL | -9.437769293  | -0.417604335 | 1.825073491  |
| MG | -7.476174079  | -0.417941555 | 0.378284818  |
| CL | -3.671793967  | -0.081989105 | 1.334087894  |
| CL | -5.756236432  | -0.889731230 | -1.426722862 |
| MG | -1.807427999  | 0.111052161  | -0.156432799 |
| CL | 2.385798002   | 0.726041062  | 1.073489192  |
| CL | 0.280731204   | 0.021779268  | -1.631506567 |
| MG | 4.443844986   | 0.657071799  | -0.361942821 |
| CL | 8.582560152   | 1.062365633  | 1.408117369  |
| CL | 6.521338266   | 0.477439949  | -1.568955363 |
| MG | 10.394403938  | 0.803658570  | -0.156789310 |
| CL | 12.376816341  | 1.316452372  | -1.311406722 |
| TI | 1.139724240   | 2.171095045  | -0.663427506 |
| CL | -0.846585202  | 2.168772164  | 0.783960215  |
| CL | 3.219042493   | 1.986559282  | -2.009668886 |
| CL | 5.309826419   | 2.655738154  | 1.143436237  |
| AL | 7.462001237   | 3.230710185  | 1.136126207  |
| C  | 7.920562689   | 4.105682065  | 2.831061379  |
| C  | 8.113859087   | 3.826525650  | -0.633021292 |
| C  | 9.346977443   | 3.118491566  | -1.200563402 |
| C  | 7.219973828   | 5.454890451  | 3.076062948  |
| C  | 0.855434951   | 4.144893250  | -1.230716082 |
| C  | 1.681745932   | 4.585933471  | -0.036197583 |
| O  | -8.498367668  | 0.799700077  | -0.916730153 |
| C  | -9.000337245  | 1.916624128  | -0.913053992 |
| C  | -6.754404539  | 2.501861002  | 1.246326836  |
| O  | -6.811401188  | 1.282385094  | 1.187841241  |
| O  | -10.272678146 | 2.116263550  | -1.159795739 |

|    |               |              |              |
|----|---------------|--------------|--------------|
| O  | -6.252875767  | 3.112098197  | 2.295456767  |
| C  | -11.113885740 | 0.954329396  | -1.481917600 |
| C  | -5.731758820  | 2.278582302  | 3.385860177  |
| C  | 2.963099946   | 5.329251395  | -0.426564191 |
| C  | 0.879004865   | 5.356631278  | 1.017101076  |
| C  | -8.246502647  | 3.202785551  | -0.742536441 |
| C  | -7.209822044  | 3.453613031  | 0.186537279  |
| C  | -8.608599312  | 4.216539011  | -1.633305049 |
| C  | -6.571389361  | 4.697203836  | 0.158084833  |
| C  | -6.914824970  | 5.672151265  | -0.765057171 |
| C  | -7.944343162  | 5.433233670  | -1.661111289 |
| C  | -12.550591453 | 1.424405549  | -1.622086332 |
| C  | -5.061216350  | 3.183384600  | 4.403309747  |
| C  | -6.041833417  | 4.166874601  | 5.044729803  |
| C  | -4.370671433  | 2.306372932  | 5.453417010  |
| C  | -13.119536157 | 1.899771238  | -0.283224679 |
| C  | -13.385564601 | 0.281831517  | -2.212437950 |
| CL | -3.035364484  | 1.408236117  | -2.014466955 |
| AL | -4.698696878  | 0.395453321  | -3.172971904 |
| C  | -6.013248969  | 1.783228439  | -3.643274513 |
| C  | -5.568171742  | 2.728144887  | -4.774491259 |
| C  | -4.020629695  | -0.972021307 | -4.407703858 |
| C  | -2.912390989  | -0.505908967 | -5.369419105 |
| H  | 7.693032560   | 3.419641386  | 3.653549310  |
| H  | 9.008080215   | 4.247013515  | 2.863346695  |
| H  | 7.300936533   | 3.754914429  | -1.359276772 |
| H  | 8.339735909   | 4.895039759  | -0.537091456 |
| H  | 10.181467082  | 3.126432369  | -0.481869089 |
| H  | 9.080872957   | 2.096030980  | -1.511349076 |
| H  | 9.753301875   | 3.585869836  | -2.100272228 |

|   |               |             |              |
|---|---------------|-------------|--------------|
| H | 7.447648952   | 6.182295514 | 2.291911012  |
| H | 6.133775593   | 5.342069438 | 3.105924702  |
| H | 7.522928454   | 5.904860237 | 4.025405544  |
| H | 1.302497429   | 4.368147629 | -2.197655232 |
| H | -0.192488618  | 4.435757695 | -1.192981614 |
| H | 2.051219806   | 3.658978311 | 0.515171549  |
| H | 3.590243617   | 5.517706883 | 0.446321754  |
| H | 3.545497203   | 4.761264840 | -1.150463051 |
| H | 2.700079107   | 6.290602806 | -0.873483718 |
| H | 1.479713351   | 5.540760055 | 1.910162644  |
| H | 0.575371115   | 6.322525991 | 0.607247848  |
| H | -0.017046196  | 4.813197784 | 1.313814615  |
| H | -6.577058752  | 1.735960508 | 3.813373263  |
| H | -5.036388455  | 1.563331561 | 2.952498637  |
| H | -10.726654861 | 0.525167548 | -2.406498962 |
| H | -11.009713226 | 0.228155426 | -0.678580357 |
| H | -6.383395104  | 6.614484266 | -0.774338730 |
| H | -8.234484667  | 6.186653816 | -2.381460185 |
| H | -5.786964311  | 4.891703552 | 0.873125106  |
| H | -9.415141632  | 4.033017665 | -2.327154427 |
| H | -12.557517639 | 2.261552540 | -2.329437387 |
| H | -4.288008709  | 3.750461627 | 3.873703489  |
| H | -6.820893935  | 3.633868281 | 5.596921663  |
| H | -5.524860350  | 4.820909216 | 5.749125986  |
| H | -6.529146061  | 4.796416655 | 4.299104762  |
| H | -3.844208391  | 2.926996639 | 6.179819972  |
| H | -5.097851982  | 1.700654136 | 6.000622436  |
| H | -3.644669968  | 1.631316925 | 4.997337817  |
| H | -13.150135076 | 1.074276857 | 0.431699216  |
| H | -12.520554519 | 2.703628397 | 0.147633274  |

|   |               |              |              |
|---|---------------|--------------|--------------|
| H | -14.137580681 | 2.271870121  | -0.410547526 |
| H | -14.425719145 | 0.593392777  | -2.319468692 |
| H | -13.021889930 | -0.012478883 | -3.199626095 |
| H | -13.360608084 | -0.597381830 | -1.565234095 |
| H | -6.948256150  | 1.285277385  | -3.927001466 |
| H | -6.247367352  | 2.369495006  | -2.749652138 |
| H | -6.327536239  | 3.481307604  | -5.007417475 |
| H | -4.653193889  | 3.265800933  | -4.513400349 |
| H | -5.366653467  | 2.184208273  | -5.700707296 |
| H | -3.665526088  | -1.831567911 | -3.833418885 |
| H | -4.879001087  | -1.339762994 | -4.984165194 |
| H | -2.602370310  | -1.304718660 | -6.049257083 |
| H | -3.233055608  | 0.335040725  | -5.990389581 |
| H | -2.022338225  | -0.182732682 | -4.825435346 |

**2Al/DIBP/DCPDMS/(MgCl<sub>2</sub>)<sub>13</sub>TiCl<sub>2</sub><sup>i</sup>Bu cluster 8**

Total atom = 168

|    |               |              |              |
|----|---------------|--------------|--------------|
| CL | -10.546788552 | -4.067125668 | 1.315571456  |
| MG | -8.745133117  | -4.074532913 | -0.041085307 |
| CL | -4.489057874  | -4.043406568 | 1.259770085  |
| MG | -2.689394933  | -4.052071016 | -0.095135466 |
| CL | -6.921360147  | -4.082725891 | -1.366333072 |
| CL | -0.894823352  | -4.060529974 | -1.464008785 |
| CL | 1.316691808   | -4.018357324 | 1.338296380  |
| MG | 3.111265416   | -4.028151740 | -0.027722605 |
| CL | 7.373233277   | -3.994184281 | 1.251458741  |
| MG | 9.165847670   | -4.005157671 | -0.112612262 |
| CL | 4.975470673   | -4.037347434 | -1.297909676 |
| CL | 10.938176539  | -4.017635352 | -1.508767417 |
| CL | -13.639255547 | -1.867099670 | -0.230256956 |



|    |               |              |              |
|----|---------------|--------------|--------------|
| MG | -11.473494321 | -2.061123259 | 0.216675321  |
| CL | -9.849675855  | -2.321308397 | -1.387199267 |
| MG | -5.682493394  | -2.274945682 | -0.102744421 |
| CL | -7.700934495  | -2.303030433 | 1.452685302  |
| CL | -3.702400121  | -2.157684668 | -1.530196101 |
| MG | 0.220678845   | -2.151999888 | -0.095242812 |
| CL | -1.748741947  | -2.079664763 | 1.282737611  |
| CL | 2.186016635   | -2.161705952 | -1.492495870 |
| MG | 6.146747785   | -2.204365165 | 0.033742447  |
| MG | 12.117684767  | -2.258276929 | -0.262141520 |
| CL | 4.108112665   | -2.108320947 | 1.392839119  |
| CL | 8.267921033   | -2.054029535 | -1.399613611 |
| CL | 10.303826245  | -2.558426028 | 1.537654004  |
| CL | 14.272032174  | -2.504206098 | 0.246891780  |
| CL | -10.654766695 | -0.273148023 | 1.571803066  |
| MG | -8.638840825  | -0.201952326 | 0.203793897  |
| CL | -4.869196940  | -0.385577437 | 1.270998359  |
| CL | -6.907825069  | -0.519792389 | -1.629082015 |
| MG | -2.935005564  | -0.115817877 | -0.115364071 |
| CL | 1.245304281   | -0.100736670 | 1.310283189  |
| CL | -0.805502535  | -0.116790593 | -1.525422718 |
| MG | 3.347581095   | -0.102502894 | -0.072074073 |
| CL | 7.424941279   | -0.387516771 | 1.601819197  |
| CL | 5.341233920   | -0.357423497 | -1.372355540 |
| MG | 9.138092337   | -0.027784728 | -0.234807364 |
| CL | 11.400534254  | -0.133686281 | -1.090638740 |
| TI | 0.189286495   | 1.732989724  | -0.150013934 |
| CL | -1.856258003  | 1.651382576  | 1.210743630  |
| CL | 2.291409992   | 1.629285473  | -1.463245981 |
| C  | 0.094323750   | 3.799559621  | -0.321792789 |

|    |               |             |              |
|----|---------------|-------------|--------------|
| C  | 0.904064534   | 3.921837657 | 0.956678238  |
| O  | -9.495213362  | 1.308207730 | -0.887063088 |
| C  | -9.890459949  | 2.452259781 | -0.702233125 |
| C  | -7.677996736  | 2.448889585 | 1.567894379  |
| O  | -7.866636060  | 1.268027035 | 1.314806266  |
| O  | -11.129784969 | 2.813852167 | -0.933085046 |
| O  | -7.142604023  | 2.826054470 | 2.706110423  |
| C  | -12.064256040 | 1.809597117 | -1.461762317 |
| C  | -6.744720229  | 1.779672597 | 3.655650243  |
| C  | 2.258779187   | 4.606850700 | 0.751752244  |
| C  | 0.126975754   | 4.543948102 | 2.121594182  |
| C  | -9.025019330  | 3.611546314 | -0.304331917 |
| C  | -8.000406872  | 3.601283820 | 0.670855426  |
| C  | -9.258401363  | 4.788742403 | -1.019885859 |
| C  | -7.243787904  | 4.761922840 | 0.859121421  |
| C  | -7.461150585  | 5.904420438 | 0.105470281  |
| C  | -8.479560665  | 5.920617382 | -0.833947857 |
| C  | -13.446686343 | 2.432026376 | -1.540039492 |
| C  | -5.974714723  | 2.428914984 | 4.791140813  |
| C  | -6.826370653  | 3.426376878 | 5.578583140  |
| C  | -5.416634340  | 1.323769487 | 5.694327856  |
| C  | -14.009155615 | 2.729403932 | -0.148141343 |
| C  | -14.365319994 | 1.489424992 | -2.326656027 |
| O  | 9.534293771   | 1.926189759 | 0.493271811  |
| O  | 8.498802652   | 1.438360391 | -1.600186559 |
| C  | 7.899579551   | 1.332023320 | -2.909362932 |
| C  | 10.260904329  | 2.315429029 | 1.669977951  |
| SI | 9.027499265   | 2.845610301 | -0.831308719 |
| C  | 10.417914108  | 3.722831121 | -1.744382428 |
| C  | 11.729680072  | 3.942767851 | -0.950329040 |

|    |              |              |              |
|----|--------------|--------------|--------------|
| C  | 12.712705091 | 4.411048209  | -2.027399184 |
| C  | 12.397614161 | 3.513453520  | -3.236000028 |
| C  | 10.909595478 | 3.090238711  | -3.081272939 |
| C  | 7.613624577  | 3.974646579  | -0.388902922 |
| C  | 8.028536969  | 5.249886424  | 0.419220756  |
| C  | 7.227685736  | 6.428169088  | -0.192329381 |
| C  | 6.136246109  | 5.776684784  | -1.048003954 |
| C  | 6.812210511  | 4.517682661  | -1.601580792 |
| CL | -3.980289416 | 1.585810815  | -1.749348797 |
| CL | 4.434766372  | 1.592503734  | 1.602305913  |
| AL | -5.674093450 | 0.933364070  | -3.105100943 |
| AL | 6.005923572  | 0.905624929  | 3.081531362  |
| C  | 5.354408946  | -0.397754396 | 4.396288970  |
| C  | 7.058142294  | 2.495312209  | 3.582315862  |
| C  | -5.066535875 | -0.264422952 | -4.537319864 |
| C  | -6.846128270 | 2.492314432  | -3.373494056 |
| C  | -3.859185751 | 0.232530039  | -5.352946618 |
| C  | -6.284657661 | 3.553529840  | -4.337369139 |
| C  | 3.996160730  | -0.069823044 | 5.042880583  |
| C  | 6.286842474  | 3.498194770  | 4.461197864  |
| H  | 0.599568516  | 4.166335761  | -1.213312314 |
| H  | -0.925433199 | 4.172711873  | -0.253117743 |
| H  | 1.171391277  | 2.876897743  | 1.323214322  |
| H  | 2.865411671  | 4.558858553  | 1.657535682  |
| H  | 2.817601439  | 4.139860787  | -0.057876269 |
| H  | 2.096775903  | 5.657606941  | 0.500405560  |
| H  | 0.704224613  | 4.496664396  | 3.047301929  |
| H  | -0.077878484 | 5.594311974  | 1.902325739  |
| H  | -0.822709545 | 4.036468709  | 2.284878424  |
| H  | -7.657942833 | 1.293204896  | 4.004022612  |

|   |               |             |              |
|---|---------------|-------------|--------------|
| H | -6.141218891  | 1.053884301 | 3.115862011  |
| H | -11.690234689 | 1.508253311 | -2.440705704 |
| H | -12.051637762 | 0.951084530 | -0.793684801 |
| H | -6.840924449  | 6.777074640 | 0.261340245  |
| H | -8.672219776  | 6.807282497 | -1.423396461 |
| H | -6.467904407  | 4.756730624 | 1.608998256  |
| H | -10.055312979 | 4.803140717 | -1.748132817 |
| H | -13.355557513 | 3.372451974 | -2.095493421 |
| H | -5.127903717  | 2.961615721 | 4.345013968  |
| H | -7.674251380  | 2.923876865 | 6.052544277  |
| H | -6.236726343  | 3.896571699 | 6.367563346  |
| H | -7.219524927  | 4.216906069 | 4.938043465  |
| H | -4.823412995  | 1.756172381 | 6.501263725  |
| H | -6.222801262  | 0.743048970 | 6.150446997  |
| H | -4.778154090  | 0.635832238 | 5.137732825  |
| H | -14.136801997 | 1.803073661 | 0.416786832  |
| H | -13.352081931 | 3.389194976 | 0.420636613  |
| H | -14.984551806 | 3.212929758 | -0.224963339 |
| H | -15.368834270 | 1.912438751 | -2.393537438 |
| H | -14.001186579 | 1.331070542 | -3.344364439 |
| H | -14.440339353 | 0.515787491 | -1.837817375 |
| H | 8.349849328   | 2.055481290 | -3.586982891 |
| H | 8.084054251   | 0.326831146 | -3.278909906 |
| H | 6.827921618   | 1.492043783 | -2.832292546 |
| H | 11.313395524  | 2.065940875 | 1.544233431  |
| H | 10.153759216  | 3.383019179 | 1.854927408  |
| H | 9.850640597   | 1.769448511 | 2.516200508  |
| H | 10.022953805  | 4.719742379 | -1.976563515 |
| H | 12.078913185  | 2.998144767 | -0.527150064 |
| H | 11.622574118  | 4.657818812 | -0.132024658 |

|   |              |              |              |
|---|--------------|--------------|--------------|
| H | 12.518347746 | 5.460303243  | -2.267304747 |
| H | 13.753114170 | 4.337388565  | -1.708117193 |
| H | 13.034968804 | 2.628391165  | -3.222831797 |
| H | 12.580438411 | 4.023605755  | -4.182018096 |
| H | 10.838047202 | 2.003756127  | -3.055223386 |
| H | 10.302021593 | 3.434018787  | -3.919810761 |
| H | 6.918913709  | 3.389343987  | 0.220552673  |
| H | 9.100068905  | 5.458878540  | 0.366882030  |
| H | 7.792546782  | 5.112781881  | 1.474742003  |
| H | 6.824928645  | 7.091331693  | 0.573847487  |
| H | 7.880266760  | 7.033294312  | -0.826502977 |
| H | 5.759930140  | 6.436603217  | -1.831210309 |
| H | 5.286471509  | 5.486004788  | -0.424907942 |
| H | 7.473574762  | 4.796939651  | -2.429668379 |
| H | 6.099764276  | 3.786274955  | -1.983310008 |
| H | 6.125747713  | -0.461881702 | 5.174699035  |
| H | 5.312452830  | -1.391693821 | 3.945675895  |
| H | 7.951618288  | 2.157883278  | 4.121496393  |
| H | 7.423874193  | 3.003188814  | 2.684901950  |
| H | -4.839445931 | -1.245935726 | -4.113409616 |
| H | -5.922202743 | -0.425365260 | -5.205472249 |
| H | -7.812110508 | 2.131415221  | -3.746812819 |
| H | -7.055026447 | 2.954303135  | -2.403985488 |
| H | -4.051679007 | 1.199839451  | -5.825211161 |
| H | -2.975091018 | 0.352587023  | -4.723368940 |
| H | -3.593876570 | -0.465767193 | -6.151959596 |
| H | -6.101089758 | 3.140022693  | -5.332229815 |
| H | -6.967789343 | 4.399103134  | -4.466043024 |
| H | -5.335350954 | 3.960221489  | -3.979669077 |
| H | 3.194992430  | -0.044527286 | 4.301912189  |

|   |             |              |             |
|---|-------------|--------------|-------------|
| H | 3.717012507 | -0.813019023 | 5.795068922 |
| H | 4.003238240 | 0.902848168  | 5.542702294 |
| H | 5.938284221 | 3.036916375  | 5.388548800 |
| H | 6.901491720 | 4.357606640  | 4.745532042 |
| H | 5.405097753 | 3.888285168  | 3.946861569 |

### TS1<sub>AI</sub>

**Total atom = 161**

|    |               |              |              |
|----|---------------|--------------|--------------|
| CL | -11.550166459 | -3.671637231 | 1.708842187  |
| MG | -9.789928702  | -3.819985033 | 0.306868981  |
| CL | -5.498159984  | -3.812096825 | 1.485828769  |
| MG | -3.739159025  | -3.961096875 | 0.085435226  |
| CL | -8.005733886  | -3.966866836 | -1.064446335 |
| CL | -1.985937102  | -4.111651827 | -1.327352000 |
| CL | 0.306673521   | -3.935451656 | 1.403669711  |
| MG | 2.059319188   | -4.086620586 | -0.006951427 |
| CL | 6.356378872   | -4.077892679 | 1.149940949  |
| MG | 8.107483298   | -4.229697410 | -0.258701956 |
| CL | 3.884840395   | -4.231636986 | -1.323840011 |
| CL | 9.838403115   | -4.383794805 | -1.699158607 |
| CL | -14.632059439 | -1.502144968 | 0.098869096  |
| MG | -12.458941700 | -1.722577717 | 0.498699935  |
| CL | -10.890107529 | -2.134381549 | -1.127032650 |
| MG | -6.687101850  | -2.110575214 | 0.036841858  |
| CL | -8.659543394  | -1.978470648 | 1.645084164  |
| CL | -4.747323143  | -2.143865702 | -1.448974797 |
| MG | -0.784861097  | -2.143122680 | -0.125785784 |
| CL | -2.710618714  | -1.924512999 | 1.297041313  |
| CL | 1.138343326   | -2.300884504 | -1.571671713 |
| MG | 5.139026832   | -2.343889343 | -0.155844431 |

|    |               |              |              |
|----|---------------|--------------|--------------|
| MG | 11.096549955  | -2.575469147 | -0.610052618 |
| CL | 3.144286129   | -2.100593232 | 1.248978933  |
| CL | 7.220743622   | -2.348164125 | -1.653406498 |
| CL | 9.328793810   | -2.703321512 | 1.254821037  |
| CL | 13.258071203  | -2.842570841 | -0.143860381 |
| CL | -11.489930453 | 0.163878301  | 1.596992653  |
| MG | -9.558214106  | -0.022519965 | 0.070638848  |
| CL | -5.723110322  | -0.128403528 | 1.327955515  |
| CL | -7.731580406  | -0.409913404 | -1.460462897 |
| MG | -3.842965375  | -0.200353545 | -0.062398491 |
| CL | 0.336949062   | -0.013949414 | 1.093540916  |
| CL | -1.828828579  | -0.149312917 | -1.659419087 |
| MG | 2.305652675   | -0.400957931 | -0.495209422 |
| CL | 6.247350630   | -0.431934944 | 1.126239921  |
| CL | 4.269720786   | -0.572372168 | -1.742632964 |
| MG | 8.347374102   | -0.465970944 | -0.024663090 |
| CL | 10.266853707  | -0.589511513 | -1.612290038 |
| TI | -0.724759142  | 1.772584652  | -0.423264240 |
| CL | -2.933185274  | 1.954637849  | 0.669139363  |
| CL | 1.391538460   | 1.539436325  | -1.688039064 |
| C  | -0.631758634  | 3.842611118  | -0.609061158 |
| C  | 0.098879543   | 3.882734710  | 0.719645614  |
| O  | 9.501930047   | 0.376239682  | 1.425316749  |
| C  | 9.709619584   | 1.404518537  | 2.049063294  |
| C  | 7.734254813   | 2.662494914  | -0.161220741 |
| O  | 8.425945774   | 1.635932190  | -0.654610655 |
| O  | -10.570415246 | 1.255936240  | -1.201837804 |
| C  | -10.710522477 | 2.454840445  | -1.375265283 |
| C  | -8.360396937  | 2.814394616  | 0.656766073  |
| O  | -8.811179539  | 1.703380662  | 0.883637979  |

|   |               |             |              |
|---|---------------|-------------|--------------|
| O | 10.842844826  | 1.585146735 | 2.699680605  |
| C | 11.813257017  | 0.487120517 | 2.649368794  |
| O | 6.517068442   | 2.875120222 | -0.660372515 |
| C | 6.259249863   | 2.560068630 | -2.051331981 |
| O | -11.888102701 | 3.010672181 | -1.552697522 |
| O | -7.684786024  | 3.484233625 | 1.568475125  |
| C | -13.065156659 | 2.127395206 | -1.513418597 |
| C | -7.450055490  | 2.823878187 | 2.854192393  |
| C | 1.530257178   | 4.420596340 | 0.619380702  |
| C | -0.688451048  | 4.574056189 | 1.838099199  |
| C | -9.583333027  | 3.434526977 | -1.514304762 |
| C | -8.494491606  | 3.567772639 | -0.627419689 |
| C | -9.635150356  | 4.243371550 | -2.650469504 |
| C | -7.491931647  | 4.493667593 | -0.929719364 |
| C | -7.535360992  | 5.255645319 | -2.086658827 |
| C | -8.615021775  | 5.134574691 | -2.948608132 |
| C | 7.783444832   | 2.991202965 | 1.312500208  |
| C | 8.724364295   | 2.509480315 | 2.255206744  |
| C | 8.694728901   | 3.006820031 | 3.564311811  |
| C | 6.841173903   | 3.924561934 | 1.758773810  |
| C | 6.808279573   | 4.381975415 | 3.065353331  |
| C | 7.748696265   | 3.928836456 | 3.976733494  |
| C | -14.317450484 | 2.983273385 | -1.477568522 |
| C | -6.473484208  | 3.665399848 | 3.656105669  |
| C | -7.027195811  | 5.055154765 | 3.975938729  |
| C | -6.098822711  | 2.899239967 | 4.929124933  |
| C | -14.401752666 | 3.805960901 | -0.189902682 |
| C | -15.535380454 | 2.066197018 | -1.642334787 |
| C | 13.030746077  | 0.857285372 | 3.476160072  |
| C | 4.905606175   | 3.125938483 | -2.447739096 |



|    |               |              |              |
|----|---------------|--------------|--------------|
| C  | 13.950934609  | -0.367663034 | 3.546356724  |
| C  | 13.760724159  | 2.079017209  | 2.914934986  |
| C  | 4.582493577   | 2.674033703  | -3.875288602 |
| C  | 4.847401404   | 4.649315609  | -2.320535968 |
| AL | 9.737709463   | 2.560438107  | -1.594598519 |
| C  | 8.801920582   | 4.479983684  | -0.774957184 |
| C  | 9.170056744   | 5.270955087  | -2.051498005 |
| C  | 9.503027031   | 2.318827732  | -3.547221145 |
| C  | 11.516565942  | 2.702228354  | -0.734934374 |
| C  | 10.817088565  | 2.213319517  | -4.341774632 |
| C  | 12.406543282  | 3.897749324  | -1.116605143 |
| H  | -0.034513502  | 4.152319514  | -1.463917332 |
| H  | -1.609811638  | 4.317742678  | -0.605196065 |
| H  | 0.231656790   | 2.813763731  | 1.095215808  |
| H  | 2.062769279   | 4.297698490  | 1.564801223  |
| H  | 2.093140118   | 3.912718905  | -0.162197548 |
| H  | 1.501331321   | 5.486100199  | 0.382118244  |
| H  | -0.180706054  | 4.467313742  | 2.798684351  |
| H  | -0.774365046  | 5.639871997  | 1.616288563  |
| H  | -1.692067874  | 4.162772035  | 1.935533057  |
| H  | -8.415749856  | 2.727803425  | 3.354668579  |
| H  | -7.057497545  | 1.830131799  | 2.651843845  |
| H  | -13.022707403 | 1.497263077  | -2.402228641 |
| H  | -12.983053312 | 1.496313929  | -0.630377328 |
| H  | 7.055222031   | 2.998252825  | -2.656251276 |
| H  | 6.276592792   | 1.478585198  | -2.170842262 |
| H  | 11.318722749  | -0.406922947 | 3.028065244  |
| H  | 12.075592970  | 0.319465643  | 1.604487149  |
| H  | -6.733061084  | 5.947921275  | -2.305412709 |
| H  | -8.670051737  | 5.732291331  | -3.848994575 |

|   |               |              |              |
|---|---------------|--------------|--------------|
| H | -6.665634938  | 4.604188903  | -0.243832322 |
| H | -10.485146839 | 4.158113150  | -3.312367413 |
| H | 9.419627942   | 2.633779341  | 4.272079561  |
| H | 6.052276091   | 5.096754215  | 3.363594425  |
| H | 7.745419178   | 4.279475984  | 5.000272664  |
| H | 6.113966646   | 4.295412520  | 1.054041155  |
| H | -14.280048200 | 3.669302189  | -2.331428235 |
| H | -5.568931798  | 3.776038365  | 3.048351308  |
| H | -7.924395465  | 4.981946535  | 4.597013797  |
| H | -6.291796682  | 5.645967428  | 4.525248913  |
| H | -7.289391690  | 5.603418899  | 3.070268978  |
| H | -5.368597557  | 3.462710785  | 5.511954094  |
| H | -6.974137086  | 2.737008486  | 5.563697127  |
| H | -5.665769390  | 1.924937928  | 4.696487701  |
| H | -14.441952973 | 3.150274545  | 0.683573275  |
| H | -13.541895605 | 4.468183725  | -0.077706251 |
| H | -15.302108649 | 4.422818990  | -0.187355956 |
| H | -16.455677731 | 2.650799446  | -1.598579300 |
| H | -15.515612729 | 1.542030525  | -2.600072417 |
| H | -15.572365322 | 1.310333625  | -0.855041334 |
| H | 12.686836485  | 1.090272427  | 4.490241420  |
| H | 4.160609960   | 2.686795229  | -1.779645635 |
| H | 14.252069607  | -0.695046859 | 2.548443458  |
| H | 14.854183179  | -0.131694212 | 4.110852638  |
| H | 13.459704944  | -1.211491712 | 4.034738300  |
| H | 13.107270946  | 2.950629599  | 2.861739944  |
| H | 14.614092663  | 2.336737553  | 3.544716651  |
| H | 14.137543004  | 1.876835537  | 1.909079017  |
| H | 3.596793775   | 3.034047098  | -4.173011372 |
| H | 5.311163490   | 3.069126665  | -4.588727430 |

|   |              |             |              |
|---|--------------|-------------|--------------|
| H | 4.578269570  | 1.586773092 | -3.956513848 |
| H | 5.568271915  | 5.127050133 | -2.990259294 |
| H | 3.855721647  | 5.017722408 | -2.589884786 |
| H | 5.061469899  | 4.981816749 | -1.303969652 |
| H | 9.549428339  | 4.632665267 | 0.005569905  |
| H | 7.878493858  | 4.911051448 | -0.408906550 |
| H | 9.260682856  | 6.330881113 | -1.790613633 |
| H | 10.117364326 | 4.979297840 | -2.507518777 |
| H | 8.400363135  | 5.187298300 | -2.817887422 |
| H | 8.930742108  | 1.394947466 | -3.683678426 |
| H | 8.885875360  | 3.110810350 | -3.982845827 |
| H | 12.038519094 | 1.773922433 | -0.989543575 |
| H | 11.409711612 | 2.684102041 | 0.353772281  |
| H | 11.454266357 | 1.412691792 | -3.960535725 |
| H | 10.636525752 | 2.003396043 | -5.399968122 |
| H | 11.398164652 | 3.138100706 | -4.295018648 |
| H | 11.962233149 | 4.852481275 | -0.823327238 |
| H | 13.385806117 | 3.843911475 | -0.631895632 |
| H | 12.588937417 | 3.943513641 | -2.192710745 |

### TS2<sub>AI</sub>

Total atom = 193

|    |               |              |              |
|----|---------------|--------------|--------------|
| CL | -11.466378901 | -3.926051504 | 1.454665535  |
| MG | -9.679975776  | -3.986290711 | 0.080714844  |
| CL | -5.411449623  | -4.038892149 | 1.340287578  |
| MG | -3.624861937  | -4.099086668 | -0.033385886 |
| CL | -7.868772506  | -4.046609264 | -1.262544327 |
| CL | -1.844632900  | -4.161583932 | -1.418700343 |
| CL | 0.394831553   | -4.142912027 | 1.361507607  |
| MG | 2.174234048   | -4.205432797 | -0.020964399 |
| CL | 6.448136894   | -4.256376725 | 1.215716306  |

|    |               |              |              |
|----|---------------|--------------|--------------|
| MG | 8.226765615   | -4.319944631 | -0.165028518 |
| CL | 4.025073274   | -4.267347612 | -1.309375984 |
| CL | 9.985489026   | -4.382875969 | -1.579018844 |
| CL | -14.524233964 | -1.670814511 | -0.081660330 |
| MG | -12.359328152 | -1.909414351 | 0.347283377  |
| CL | -10.758238896 | -2.220048124 | -1.270510373 |
| MG | -6.578249241  | -2.255186779 | -0.026394907 |
| CL | -8.580281463  | -2.226028729 | 1.547384542  |
| CL | -4.610723725  | -2.196554512 | -1.474555468 |
| MG | -0.673515393  | -2.265233712 | -0.078523299 |
| CL | -2.627141810  | -2.136285221 | 1.318138483  |
| CL | 1.277241504   | -2.331672302 | -1.494051169 |
| MG | 5.250760217   | -2.450842312 | -0.006872825 |
| MG | 11.215314366  | -2.640229807 | -0.360263413 |
| CL | 3.228381446   | -2.295978668 | 1.371949048  |
| CL | 7.359641313   | -2.359985325 | -1.461258303 |
| CL | 9.413368572   | -2.883599214 | 1.460436946  |
| CL | 13.369024644  | -2.930154968 | 0.131273862  |
| CL | -11.486456194 | -0.128000117 | 1.676765583  |
| MG | -9.486889672  | -0.116951243 | 0.282891971  |
| CL | -5.715269665  | -0.377184155 | 1.328129075  |
| CL | -7.779054144  | -0.486784271 | -1.558933550 |
| MG | -3.787963014  | -0.161575794 | -0.075604176 |
| CL | 0.395499199   | -0.245399800 | 1.309524640  |
| CL | -1.679801673  | -0.207062650 | -1.503120119 |
| MG | 2.495043271   | -0.295333660 | -0.094378670 |
| CL | 6.512512811   | -0.597637983 | 1.440198005  |
| CL | 4.441610700   | -0.623578314 | -1.451749712 |
| MG | 8.448515226   | -0.369348565 | -0.178446347 |
| CL | 10.493085077  | -0.715245979 | -1.518317982 |

|    |               |             |              |
|----|---------------|-------------|--------------|
| TI | -0.635431720  | 1.614958032 | -0.125980889 |
| CL | -2.671443678  | 1.586225949 | 1.246494209  |
| CL | 1.435227451   | 1.452914224 | -1.477667420 |
| C  | -0.675550285  | 3.684696271 | -0.290511234 |
| C  | 0.152946131   | 3.781041787 | 0.978281773  |
| O  | 9.458872343   | 0.681451095 | 1.202225606  |
| C  | 9.981966348   | 1.773337819 | 1.401390318  |
| C  | 7.938888776   | 2.689797092 | -0.914443013 |
| O  | 8.512859974   | 1.509513784 | -1.187802791 |
| O  | -10.324268459 | 1.401258473 | -0.812658061 |
| C  | -10.695441568 | 2.554513754 | -0.635723815 |
| C  | -8.461468474  | 2.527033894 | 1.613199799  |
| O  | -8.670005170  | 1.347710873 | 1.369365420  |
| O  | 11.209516226  | 1.870922783 | 1.857460145  |
| C  | 11.935542784  | 0.631024189 | 2.157811797  |
| O  | 6.656242840   | 2.835123638 | -1.230208491 |
| C  | 6.180800854   | 2.332702589 | -2.507873448 |
| O  | -11.929357552 | 2.938299638 | -0.860037119 |
| O  | -7.912156712  | 2.903696907 | 2.745045742  |
| C  | -12.887575018 | 1.948054871 | -1.372134349 |
| C  | -7.523180766  | 1.857474787 | 3.698640212  |
| C  | 1.519728932   | 4.437885828 | 0.760903016  |
| C  | -0.595597498  | 4.413268165 | 2.156451421  |
| C  | -9.804367561  | 3.700319783 | -0.255748963 |
| C  | -8.771270544  | 3.678337331 | 0.710204112  |
| C  | -10.021835442 | 4.875939221 | -0.978874784 |
| C  | -7.991109603  | 4.825834324 | 0.882201058  |
| C  | -8.193521023  | 5.966114803 | 0.121072122  |
| C  | -9.219901249  | 5.994157004 | -0.809348789 |
| C  | 8.277391502   | 3.430576840 | 0.352287523  |

|    |               |              |              |
|----|---------------|--------------|--------------|
| C  | 9.284922444   | 3.088875471  | 1.287956989  |
| C  | 9.584188018   | 3.984729041  | 2.322219169  |
| C  | 7.579069054   | 4.625743790  | 0.557436126  |
| C  | 7.865861027   | 5.481973253  | 1.607615162  |
| C  | 8.890963185   | 5.171615510  | 2.486540793  |
| C  | -14.257436573 | 2.598084410  | -1.447810756 |
| C  | -6.733208354  | 2.502062073  | 4.822957300  |
| C  | -7.561973832  | 3.518643915  | 5.610308624  |
| C  | -6.185311400  | 1.394357730  | 5.729262058  |
| C  | -14.804742383 | 2.919932719  | -0.055297477 |
| C  | -15.200403951 | 1.667566989  | -2.219837385 |
| C  | 13.299656207  | 0.987523383  | 2.720582048  |
| C  | 4.764465689   | 2.824968096  | -2.748679691 |
| C  | 13.963994909  | -0.293674385 | 3.239036917  |
| C  | 14.176174671  | 1.693200196  | 1.683809918  |
| C  | 4.247588477   | 2.203705958  | -4.050139139 |
| C  | 4.669651643   | 4.351142224  | -2.785643853 |
| CL | -4.814212555  | 1.559530324  | -1.705604290 |
| CL | 3.571144761   | 1.374781330  | 1.584625781  |
| AL | -6.525501460  | 0.934137367  | -3.050365118 |
| AL | 5.174963443   | 0.661188844  | 3.017271240  |
| C  | -7.668980671  | 2.513887528  | -3.321320506 |
| C  | -7.092048834  | 3.559856358  | -4.292699805 |
| C  | -5.950834923  | -0.282715898 | -4.480017181 |
| C  | -4.740631890  | 0.188232476  | -5.306920443 |
| C  | 6.267735851   | 2.214788369  | 3.526808958  |
| C  | 4.553415724   | -0.662744397 | 4.328436165  |
| C  | 3.188868826   | -0.370911460 | 4.978469334  |
| C  | 5.607160762   | 3.123029608  | 4.580264922  |
| AL | 9.745402797   | 2.061382031  | -2.491781334 |

|   |               |             |              |
|---|---------------|-------------|--------------|
| C | 8.881715817   | 4.178150479 | -2.231475590 |
| C | 9.212019686   | 1.232315520 | -4.208317664 |
| C | 11.574454625  | 2.548086772 | -1.884745977 |
| C | 10.329150170  | 0.970964176 | -5.232415894 |
| C | 12.760689697  | 1.913113944 | -2.632209230 |
| C | 9.286581996   | 4.496037094 | -3.691201074 |
| H | -0.171007236  | 4.040211345 | -1.186990790 |
| H | -1.683209848  | 4.086839972 | -0.208714857 |
| H | 0.401758552   | 2.728327358 | 1.335124631  |
| H | 2.137075340   | 4.370261564 | 1.657927183  |
| H | 2.059847894   | 3.965473634 | -0.058008849 |
| H | 1.377060659   | 5.493570326 | 0.518336245  |
| H | -0.008104584  | 4.346854673 | 3.074513634  |
| H | -0.778937320  | 5.469492402 | 1.946197021  |
| H | -1.554667182  | 3.926787160 | 2.328666974  |
| H | -8.441226554  | 1.388449988 | 4.058053399  |
| H | -6.936269709  | 1.118135025 | 3.158990381  |
| H | -12.526439550 | 1.629048105 | -2.350320770 |
| H | -12.888220825 | 1.096319724 | -0.695331603 |
| H | 6.862147728   | 2.704759952 | -3.276860917 |
| H | 6.216443994   | 1.245972716 | -2.494254294 |
| H | 11.332812668  | 0.060884563 | 2.864323635  |
| H | 12.024756100  | 0.063321364 | 1.232288659  |
| H | -7.555334513  | 6.827956014 | 0.264111187  |
| H | -9.400858510  | 6.879478962 | -1.404501170 |
| H | -7.208596576  | 4.811815568 | 1.625046755  |
| H | -10.824947478 | 4.899626326 | -1.700028998 |
| H | 10.356132111  | 3.717226792 | 3.027675246  |
| H | 7.291916288   | 6.391291431 | 1.728780211  |
| H | 9.139658330   | 5.833126961 | 3.305625317  |

|   |               |              |              |
|---|---------------|--------------|--------------|
| H | 6.793294391   | 4.886302644  | -0.133444945 |
| H | -14.150359988 | 3.531221437  | -2.012640004 |
| H | -5.881735785  | 3.017835517  | 4.365984221  |
| H | -8.413689453  | 3.033206855  | 6.095035233  |
| H | -6.958145145  | 3.984902442  | 6.390849409  |
| H | -7.947910979  | 4.310776073  | 4.967360697  |
| H | -5.578461059  | 1.822753965  | 6.528155653  |
| H | -6.996819517  | 0.829843068  | 6.196117935  |
| H | -5.562679043  | 0.692440789  | 5.172222708  |
| H | -14.948157447 | 2.001627661  | 0.518863161  |
| H | -14.130317462 | 3.570881072  | 0.503278285  |
| H | -15.770232487 | 3.423207044  | -0.130564423 |
| H | -16.195332701 | 2.110744360  | -2.284568077 |
| H | -14.846063593 | 1.492158329  | -3.238207829 |
| H | -15.292519856 | 0.700387805  | -1.721222515 |
| H | 13.139903227  | 1.663365313  | 3.568401127  |
| H | 4.145946381   | 2.454577598  | -1.928973558 |
| H | 14.091396018  | -1.025508878 | 2.438193627  |
| H | 14.949542197  | -0.066309922 | 3.648055495  |
| H | 13.373122168  | -0.760740357 | 4.029915375  |
| H | 13.705657524  | 2.601935675  | 1.305993479  |
| H | 15.137366482  | 1.969442549  | 2.120554826  |
| H | 14.372551780  | 1.032531962  | 0.835743651  |
| H | 3.211221717   | 2.495868845  | -4.220945050 |
| H | 4.836351908   | 2.537685999  | -4.909663909 |
| H | 4.281316980   | 1.114575696  | -4.012058636 |
| H | 5.281315817   | 4.766553424  | -3.592331267 |
| H | 3.638378842   | 4.661673855  | -2.961355800 |
| H | 4.992731516   | 4.801364285  | -1.846170614 |
| H | -8.643369945  | 2.169692667  | -3.688561015 |



|   |              |              |              |
|---|--------------|--------------|--------------|
| H | -7.864681121 | 2.984315859  | -2.353129620 |
| H | -7.759396489 | 4.417915651  | -4.421772473 |
| H | -6.133271234 | 3.949699021  | -3.941547526 |
| H | -6.921493288 | 3.138585745  | -5.286621812 |
| H | -5.738282726 | -1.265947163 | -4.052617566 |
| H | -6.814089037 | -0.431538014 | -5.141180614 |
| H | -4.493628767 | -0.518855158 | -6.104064897 |
| H | -4.919154334 | 1.156383679  | -5.782964739 |
| H | -3.849977420 | 0.295596360  | -4.684336506 |
| H | 7.222959498  | 1.842284724  | 3.916278832  |
| H | 6.514015197  | 2.803610311  | 2.639851832  |
| H | 4.537282165  | -1.657707702 | 3.878746313  |
| H | 5.327837011  | -0.705575052 | 5.105625249  |
| H | 2.386028570  | -0.364918007 | 4.239104293  |
| H | 2.929917416  | -1.121519620 | 5.730762116  |
| H | 3.172394747  | 0.601429912  | 5.478847458  |
| H | 5.375617514  | 2.577732236  | 5.498841405  |
| H | 6.249326947  | 3.963436557  | 4.862117933  |
| H | 4.668230676  | 3.546845218  | 4.214655643  |
| H | 7.937477620  | 4.679267128  | -2.056039111 |
| H | 9.612350818  | 4.598143040  | -1.543443100 |
| H | 8.423649781  | 1.823481578  | -4.684692335 |
| H | 8.735592584  | 0.279364414  | -3.952827590 |
| H | 11.666151315 | 2.316307431  | -0.818919362 |
| H | 11.668849588 | 3.638234610  | -1.939838880 |
| H | 11.102449167 | 0.316632386  | -4.826416646 |
| H | 9.943557146  | 0.491308833  | -6.136529906 |
| H | 10.821858884 | 1.894761556  | -5.547392019 |
| H | 12.761438959 | 2.178822055  | -3.691368431 |
| H | 13.717838861 | 2.243548875  | -2.218315567 |

|   |              |             |              |
|---|--------------|-------------|--------------|
| H | 12.743122026 | 0.824310136 | -2.572707986 |
| H | 8.537774633  | 4.172418688 | -4.412065144 |
| H | 9.388870111  | 5.582513655 | -3.784782798 |
| H | 10.245509617 | 4.069932158 | -3.995459163 |

**Et-DIBP-AIEt<sub>2</sub>**

Total atom = 64

|    |              |              |              |
|----|--------------|--------------|--------------|
| C  | 5.153651353  | -0.659750753 | 0.871713595  |
| C  | 3.940663811  | 0.096586761  | 0.356358401  |
| C  | -3.562529384 | 0.148735275  | 0.023486570  |
| O  | 2.832440266  | -0.842031491 | 0.222365560  |
| C  | -5.020790132 | -0.014566774 | 0.443556462  |
| O  | -2.724765473 | -0.370039528 | 1.050763506  |
| O  | 1.529285964  | 0.835812777  | -0.382386007 |
| C  | 1.662973929  | -0.372956687 | -0.161207732 |
| C  | -0.716139399 | -1.335910400 | 0.053751309  |
| C  | 0.636338735  | -1.427489529 | -0.351614086 |
| C  | -1.529896026 | -2.433364538 | -0.227249275 |
| C  | 1.102903866  | -2.574052598 | -1.012379266 |
| C  | -1.070170649 | -3.549923547 | -0.911975683 |
| C  | 0.255274221  | -3.624105960 | -1.313878931 |
| C  | -1.311550351 | -0.175834879 | 0.915737502  |
| O  | -1.043913956 | 1.064441414  | 0.415373107  |
| C  | -0.769818743 | -0.334828694 | 2.357851567  |
| AL | -0.071533818 | 1.851217322  | -0.806122508 |
| C  | -1.275783892 | 0.731859819  | 3.322258552  |
| C  | -0.492596949 | 1.414109193  | -2.696402083 |
| C  | 0.391847555  | 3.717872293  | -0.350511709 |
| C  | 0.517248425  | 1.904912261  | -3.749528132 |
| C  | 0.882402785  | 3.998118537  | 1.079335402  |
| C  | 6.272490294  | 0.343221712  | 1.170951785  |

|   |              |              |              |
|---|--------------|--------------|--------------|
| C | -5.932816552 | 0.662869754  | -0.582627338 |
| C | 5.617010122  | -1.743100603 | -0.104012656 |
| C | -5.408985510 | -1.480060792 | 0.649164186  |
| H | 3.632806222  | 0.884428993  | 1.043254008  |
| H | -3.337681796 | 1.204209183  | -0.136995368 |
| H | 4.125867294  | 0.546071568  | -0.621439216 |
| H | -3.384546484 | -0.375814932 | -0.926793369 |
| H | -2.550455019 | -2.404976721 | 0.120412294  |
| H | 2.141785476  | -2.623246496 | -1.306046550 |
| H | -1.750409410 | -4.366488992 | -1.120091006 |
| H | 0.629217933  | -4.489369628 | -1.845119192 |
| H | 0.322758521  | -0.304109526 | 2.310176381  |
| H | -1.041170326 | -1.331608482 | 2.714960389  |
| H | -0.826699841 | 0.594571101  | 4.308383204  |
| H | -1.020915553 | 1.729821282  | 2.966888324  |
| H | -2.358402255 | 0.675775359  | 3.430345753  |
| H | -1.477181667 | 1.844778778  | -2.922820041 |
| H | -0.633582722 | 0.331708846  | -2.805705810 |
| H | -0.488868625 | 4.341107774  | -0.555063381 |
| H | 1.145696495  | 4.068458495  | -1.067923796 |
| H | 0.647029068  | 2.989713242  | -3.708518237 |
| H | 0.215054263  | 1.657918098  | -4.772691025 |
| H | 1.507853645  | 1.464439260  | -3.597923970 |
| H | 0.133551737  | 3.712217714  | 1.821735839  |
| H | 1.789808458  | 3.432470537  | 1.312249632  |
| H | 1.115441705  | 5.055078711  | 1.246781457  |
| H | 4.861792790  | -1.139546082 | 1.811897905  |
| H | -5.133968757 | 0.505351831  | 1.401200814  |
| H | 6.588164325  | 0.865384463  | 0.263778975  |
| H | 5.958762101  | 1.093950118  | 1.899034872  |

|   |              |              |              |
|---|--------------|--------------|--------------|
| H | -5.688539083 | 1.720827326  | -0.700253764 |
| H | -5.842628493 | 0.188244148  | -1.564012956 |
| H | -6.979142783 | 0.593319486  | -0.278632473 |
| H | 7.145452848  | -0.170193255 | 1.576077398  |
| H | 4.830556239  | -2.473194860 | -0.296648999 |
| H | 5.916768572  | -1.304450568 | -1.060043583 |
| H | 6.477861136  | -2.279264131 | 0.298925469  |
| H | -5.312206551 | -2.042986135 | -0.284726880 |
| H | -4.777554067 | -1.953842724 | 1.401134519  |
| H | -6.447074994 | -1.566083403 | 0.978204936  |

**12re-TS for 2DIBP/(MgCl<sub>2</sub>)<sub>13</sub>/TiCl<sub>2</sub><sup>i</sup>Bu cluster 2**

Total atom = 148

|    |               |              |              |
|----|---------------|--------------|--------------|
| CL | 10.750369770  | -4.096300821 | -1.514066320 |
| MG | 8.977798432   | -4.092016969 | -0.119804150 |
| CL | 4.695792331   | -4.023748881 | -1.331870092 |
| MG | 2.924457669   | -4.020272119 | 0.060864381  |
| CL | 7.181522822   | -4.087562378 | 1.243576242  |
| CL | 1.158762028   | -4.017711374 | 1.466124371  |
| CL | -1.110329125  | -3.951734649 | -1.289328849 |
| MG | -2.875462282  | -3.949931981 | 0.113811620  |
| CL | -7.162845678  | -3.879125648 | -1.076345309 |
| MG | -8.926440164  | -3.878156514 | 0.324881264  |
| CL | -4.712646026  | -3.945946606 | 1.422421569  |
| CL | -10.670130291 | -3.877982404 | 1.758167685  |
| CL | 13.892710533  | -1.924717287 | -0.028566202 |
| MG | 11.715920518  | -2.100611669 | -0.430505185 |
| CL | 10.124579919  | -2.350178532 | 1.206321457  |
| MG | 5.931688823   | -2.267901426 | 0.008962379  |
| CL | 7.917057262   | -2.309244411 | -1.588259693 |

|    |               |              |              |
|----|---------------|--------------|--------------|
| CL | 3.983047539   | -2.137363149 | 1.477653100  |
| MG | 0.030768282   | -2.096731272 | 0.124876331  |
| CL | 1.971169122   | -2.037756527 | -1.293545464 |
| CL | -1.905211029  | -2.093572366 | 1.562236445  |
| MG | -5.896552000  | -2.101505475 | 0.119666497  |
| MG | -11.861130126 | -2.107287416 | 0.539439039  |
| CL | -3.886457639  | -2.018957244 | -1.281912645 |
| CL | -7.986237788  | -1.936622653 | 1.596954341  |
| CL | -10.087421693 | -2.418509931 | -1.297991958 |
| CL | -14.027477363 | -2.334586358 | 0.074535275  |
| CL | 10.820127893  | -0.264589526 | -1.666436784 |
| MG | 8.869050548   | -0.280306596 | -0.149790628 |
| CL | 5.015295867   | -0.353044406 | -1.415063839 |
| CL | 7.028802022   | -0.499308117 | 1.391661854  |
| MG | 3.127329668   | -0.258590585 | -0.018336491 |
| CL | -0.957626751  | -0.029684764 | -1.162312097 |
| CL | 1.088344175   | -0.113189759 | 1.546905240  |
| MG | -2.974426837  | -0.231765174 | 0.320787950  |
| CL | -6.928865993  | -0.374674626 | -1.404398134 |
| CL | -4.979760467  | -0.199912584 | 1.534178528  |
| MG | -8.993043280  | -0.215446110 | -0.171680208 |
| CL | -11.025598749 | -0.040017935 | 1.308612625  |
| TI | 0.091312697   | 1.968498244  | 0.311546590  |
| CL | 2.444214576   | 2.002694207  | -0.626565343 |
| CL | -2.121157468  | 1.859051877  | 1.363946119  |
| C  | 0.521181140   | 3.767845319  | 1.453907415  |
| C  | 1.771674293   | 4.637248326  | 1.604680378  |
| O  | -10.013486035 | 0.951105507  | -1.542127386 |
| C  | -10.319009815 | 2.122738136  | -1.685164823 |
| C  | -8.087488345  | 2.749965157  | 0.424284310  |

|   |               |             |              |
|---|---------------|-------------|--------------|
| O | -8.473202762  | 1.613221660 | 0.636969429  |
| O | 9.916006287   | 1.064355555 | 1.029629431  |
| C | 10.118341187  | 2.265395635 | 1.085160794  |
| C | 7.782282283   | 2.544856422 | -0.982837807 |
| O | 8.185747412   | 1.399753362 | -1.100773384 |
| O | -11.557481272 | 2.512152357 | -1.893789982 |
| C | -12.598135889 | 1.474122252 | -1.933297681 |
| O | -7.417874120  | 3.431825406 | 1.333667515  |
| C | -7.109045364  | 2.745483848 | 2.590028129  |
| O | 11.321825049  | 2.776454186 | 1.218115055  |
| O | 7.123568997   | 3.149188086 | -1.950763337 |
| C | 12.454938794  | 1.839033403 | 1.280976282  |
| C | 6.843670983   | 2.376692829 | -3.163222924 |
| C | 1.459099605   | 6.137162431 | 1.639603991  |
| C | 2.539022388   | 4.236228586 | 2.876310717  |
| C | 9.044638567   | 3.313169386 | 1.118715982  |
| C | 7.962815091   | 3.415999564 | 0.219190064  |
| C | 9.144001233   | 4.229666040 | 2.166882023  |
| C | 7.015240115   | 4.423450404 | 0.422062656  |
| C | 7.105987250   | 5.298008838 | 1.493270961  |
| C | 8.178202671   | 5.204403592 | 2.367761475  |
| C | -8.306644777  | 3.524177620 | -0.836271008 |
| C | -9.344435541  | 3.261828957 | -1.756207116 |
| C | -9.490952164  | 4.092595375 | -2.868371532 |
| C | -7.450864601  | 4.601711772 | -1.083901988 |
| C | -7.585383035  | 5.391708834 | -2.214596252 |
| C | -8.613109593  | 5.138661631 | -3.110262594 |
| C | 13.746279161  | 2.630130972 | 1.184880395  |
| C | 5.847313985   | 3.150398632 | -4.008061778 |
| C | 6.396764761   | 4.502008581 | -4.468104629 |

|   |               |             |              |
|---|---------------|-------------|--------------|
| C | 5.430674517   | 2.275465185 | -5.195017383 |
| C | 13.886542711  | 3.316920108 | -0.175528553 |
| C | 14.919031597  | 1.681874395 | 1.461806472  |
| C | -13.959714237 | 2.144011734 | -1.925653401 |
| C | -6.197314563  | 3.635637981 | 3.415422803  |
| C | -15.029083374 | 1.069901468 | -2.159166829 |
| C | -14.205444880 | 2.908728724 | -0.623032870 |
| C | -5.741850067  | 2.854496120 | 4.652623082  |
| C | -6.863311758  | 4.959266003 | 3.796091067  |
| C | -0.546091640  | 3.195421884 | -1.428334847 |
| C | -0.316587945  | 4.305535856 | -0.619500889 |
| C | -1.471292229  | 5.148060566 | -0.152220588 |
| H | -0.330215800  | 4.172780597 | 1.999176174  |
| H | 0.740429046   | 2.783604494 | 1.960974490  |
| H | 2.434182857   | 4.440308162 | 0.756965806  |
| H | 2.377335055   | 6.710597256 | 1.780580120  |
| H | 0.994302130   | 6.495099765 | 0.720574675  |
| H | 0.790129493   | 6.377993160 | 2.470440372  |
| H | 3.440416399   | 4.842934631 | 2.988111047  |
| H | 1.925443514   | 4.381944781 | 3.769084000  |
| H | 2.844245776   | 3.189180358 | 2.843378174  |
| H | 7.793138402   | 2.228063552 | -3.681795413 |
| H | 6.450536394   | 1.409540983 | -2.859987866 |
| H | 12.372180221  | 1.299018895 | 2.224613345  |
| H | 12.353033221  | 1.131925537 | 0.459921581  |
| H | -8.054806215  | 2.545594989 | 3.097493844  |
| H | -6.634213837  | 1.797846414 | 2.345257953  |
| H | -12.431997383 | 0.887531955 | -2.837431140 |
| H | -12.462586142 | 0.832382049 | -1.065160084 |
| H | 6.347092557   | 6.056226661 | 1.634725137  |

|   |               |             |              |
|---|---------------|-------------|--------------|
| H | 8.270271214   | 5.887970865 | 3.201615663  |
| H | 6.194993011   | 4.508776575 | -0.274396868 |
| H | 9.989059859   | 4.164379061 | 2.837198027  |
| H | -10.302219770 | 3.902944614 | -3.556471519 |
| H | -6.895033432  | 6.206916056 | -2.387005156 |
| H | -8.739015777  | 5.752780694 | -3.992317947 |
| H | -6.667728468  | 4.812753661 | -0.372023569 |
| H | 13.727638637  | 3.398246056 | 1.966487435  |
| H | 4.962206052   | 3.320705978 | -3.385603261 |
| H | 7.274332001   | 4.367493053 | -5.106746035 |
| H | 5.647439016   | 5.046156099 | -5.046181320 |
| H | 6.689113516   | 5.127696359 | -3.623826396 |
| H | 4.685438057   | 2.789338027 | -5.804171666 |
| H | 6.285423433   | 2.050515345 | -5.838486042 |
| H | 5.000769143   | 1.329398354 | -4.862086240 |
| H | 13.910146069  | 2.576718232 | -0.979192470 |
| H | 13.058955921  | 4.001208280 | -0.368828744 |
| H | 14.813626895  | 3.891046202 | -0.221374138 |
| H | 15.865023222  | 2.219709673 | 1.380965488  |
| H | 14.860380582  | 1.254575345 | 2.465058091  |
| H | 14.934776942  | 0.852587064 | 0.751574736  |
| H | -13.989996814 | 2.852492888 | -2.761258122 |
| H | -5.312320483  | 3.847226002 | 2.805360326  |
| H | -14.997571360 | 0.301406257 | -1.383407561 |
| H | -16.023085905 | 1.519725302 | -2.149106084 |
| H | -14.895970858 | 0.574229558 | -3.123223646 |
| H | -13.452483372 | 3.681497142 | -0.461436214 |
| H | -15.183654600 | 3.392329360 | -0.641820177 |
| H | -14.183510017 | 2.229118969 | 0.232393711  |
| H | -5.054733270  | 3.455235959 | 5.250554055  |



|   |              |             |              |
|---|--------------|-------------|--------------|
| H | -6.592049225 | 2.593526555 | 5.288427464  |
| H | -5.231032424 | 1.931066157 | 4.375953672  |
| H | -7.743501970 | 4.784976023 | 4.421289758  |
| H | -6.174538256 | 5.588470072 | 4.363063386  |
| H | -7.182776389 | 5.519101317 | 2.916085687  |
| H | -1.566187709 | 2.896615820 | -1.636475718 |
| H | 0.634677002  | 4.807849455 | -0.729702988 |
| H | -1.227608073 | 5.788490987 | 0.691555534  |
| H | -1.764066262 | 5.795719069 | -0.984901576 |
| H | -2.329247608 | 4.529934918 | 0.108747629  |
| H | 0.204035225  | 2.884338723 | -2.144893623 |

**12si-TS for 2DIBP/(MgCl<sub>2</sub>)<sub>13</sub>/TiCl<sub>2</sub><sup>i</sup>Bu cluster 2**

Total atom = 148

|    |               |              |              |
|----|---------------|--------------|--------------|
| CL | -10.798239597 | -4.080177506 | 1.473075783  |
| MG | -9.023418358  | -4.069006262 | 0.081705028  |
| CL | -4.743212607  | -4.021953690 | 1.301062497  |
| MG | -2.969600552  | -4.011586071 | -0.088838168 |
| CL | -7.224929571  | -4.058030930 | -1.278742234 |
| CL | -1.201681490  | -4.002024895 | -1.491203979 |
| CL | 1.063130992   | -3.964755081 | 1.268293211  |
| MG | 2.830471436   | -3.955969827 | -0.131977823 |
| CL | 7.116122472   | -3.906253013 | 1.065450570  |
| MG | 8.881979188   | -3.898270627 | -0.332901234 |
| CL | 4.669805004   | -3.946005752 | -1.437628618 |
| CL | 10.627967214  | -3.890819476 | -1.763380798 |
| CL | -13.932539358 | -1.888190025 | 0.000609304  |
| MG | -11.756868287 | -2.073092311 | 0.404517147  |
| CL | -10.163554652 | -2.313278554 | -1.231801636 |
| MG | -5.972590237  | -2.251867331 | -0.027134833 |

|    |               |              |              |
|----|---------------|--------------|--------------|
| CL | -7.960436758  | -2.301205413 | 1.566500776  |
| CL | -4.020993822  | -2.114338488 | -1.491649091 |
| MG | -0.070885300  | -2.095138195 | -0.132353457 |
| CL | -2.013536228  | -2.042772072 | 1.283507373  |
| CL | 1.867530214   | -2.085124198 | -1.566582788 |
| MG | 5.856543255   | -2.115486744 | -0.117808293 |
| MG | 11.821616321  | -2.133380404 | -0.528173152 |
| CL | 3.844348490   | -2.039265370 | 1.281196070  |
| CL | 7.948880167   | -1.943846226 | -1.590364478 |
| CL | 10.044166870  | -2.455113178 | 1.303808687  |
| CL | 13.986610611  | -2.370156096 | -0.061748605 |
| CL | -10.857204891 | -0.249801462 | 1.656647480  |
| MG | -8.904259339  | -0.265255080 | 0.143529833  |
| CL | -5.054563293  | -0.346361989 | 1.411293368  |
| CL | -7.062098262  | -0.473184597 | -1.399750404 |
| MG | -3.161061368  | -0.249692062 | 0.022658370  |
| CL | 0.927116083   | -0.035810404 | 1.176114975  |
| CL | -1.121740541  | -0.093905154 | -1.529719037 |
| MG | 2.936103034   | -0.236190940 | -0.313627772 |
| CL | 6.892299757   | -0.406992466 | 1.425066824  |
| CL | 4.948905210   | -0.192294812 | -1.512856182 |
| MG | 8.958616136   | -0.241215151 | 0.197396119  |
| CL | 10.991698348  | -0.057317339 | -1.280481830 |
| TI | -0.124381861  | 1.982151169  | -0.269367004 |
| CL | -2.457995346  | 1.997114797  | 0.681404803  |
| CL | 2.068079407   | 1.844357558  | -1.370330433 |
| C  | -0.612838656  | 3.794945245  | -1.365533602 |
| C  | 0.217246505   | 4.619948736  | -2.353072220 |
| O  | 9.982816153   | 0.906486429  | 1.580984107  |
| C  | 10.284816250  | 2.076572369  | 1.742760522  |

|   |               |             |              |
|---|---------------|-------------|--------------|
| C | 8.056765652   | 2.731235487 | -0.359867464 |
| O | 8.443916837   | 1.598361353 | -0.590185832 |
| O | -9.938950502  | 1.093523410 | -1.027331289 |
| C | -10.104264127 | 2.299811825 | -1.091355219 |
| C | -7.769886364  | 2.533060341 | 0.975497677  |
| O | -8.208440163  | 1.402476274 | 1.109302828  |
| O | 11.522242900  | 2.466129151 | 1.957692412  |
| C | 12.565402059  | 1.430083306 | 1.980090062  |
| O | 7.391836442   | 3.428446521 | -1.261072099 |
| C | 7.087484682   | 2.762498418 | -2.529139727 |
| O | -11.293121059 | 2.845384496 | -1.219438559 |
| O | -7.106739634  | 3.135997180 | 1.941290349  |
| C | -12.451187299 | 1.937221041 | -1.261485598 |
| C | -6.867502734  | 2.377020962 | 3.170696454  |
| C | -0.091481125  | 4.189926477 | -3.796933268 |
| C | -0.005068969  | 6.128332796 | -2.197537136 |
| C | -8.996312007  | 3.309953244 | -1.141437414 |
| C | -7.911033058  | 3.386419649 | -0.243831723 |
| C | -9.060859218  | 4.210613483 | -2.205584119 |
| C | -6.922270119  | 4.348886406 | -0.465922417 |
| C | -6.977927104  | 5.205023004 | -1.554407991 |
| C | -8.055613951  | 5.140681251 | -2.424965699 |
| C | 8.269013360   | 3.484119836 | 0.914515680  |
| C | 9.306334744   | 3.210805631 | 1.831652272  |
| C | 9.447285430   | 4.022984517 | 2.958092530  |
| C | 7.407044301   | 4.552552044 | 1.179339928  |
| C | 7.535626162   | 5.323175385 | 2.324033278  |
| C | 8.563632602   | 5.060204648 | 3.216552927  |
| C | -13.721414298 | 2.757573685 | -1.137105724 |
| C | -5.873580479  | 3.143711374 | 4.024600337  |

|   |               |             |              |
|---|---------------|-------------|--------------|
| C | -6.405232228  | 4.512913094 | 4.452374927  |
| C | -5.499181984  | 2.279332786 | 5.233156921  |
| C | -13.814937654 | 3.449602822 | 0.224632458  |
| C | -14.919837640 | 1.833267860 | -1.384263626 |
| C | 13.925569832  | 2.102815500 | 1.977963024  |
| C | 6.182947513   | 3.668638691 | -3.344983407 |
| C | 14.997564110  | 1.027495424 | 2.193353743  |
| C | 14.166037121  | 2.886207845 | 0.685516677  |
| C | 5.727203242   | 2.907104548 | -4.594193294 |
| C | 6.857286813   | 4.993805095 | -3.705086382 |
| C | 0.626183071   | 3.194126004 | 1.435908105  |
| C | 0.234351046   | 4.314975061 | 0.708567611  |
| C | -0.903810656  | 5.174184167 | 1.183690419  |
| H | -1.576313522  | 4.253446482 | -1.150584783 |
| H | -0.873771252  | 2.820369204 | -1.870550793 |
| H | 1.276801049   | 4.409555094 | -2.180330829 |
| H | 0.503835812   | 4.770497036 | -4.504995907 |
| H | 0.138780711   | 3.134922543 | -3.952893171 |
| H | -1.146064913  | 4.347956764 | -4.037855480 |
| H | 0.592742397   | 6.676003897 | -2.928428243 |
| H | -1.053811762  | 6.387722820 | -2.367583598 |
| H | 0.274332088   | 6.497347550 | -1.209893370 |
| H | -7.830030135  | 2.254720531 | 3.671736017  |
| H | -6.487609423  | 1.397818976 | 2.889906703  |
| H | -12.400705084 | 1.398021995 | -2.207869946 |
| H | -12.350053425 | 1.224991795 | -0.444682569 |
| H | 8.035014678   | 2.567048380 | -3.035037522 |
| H | 6.608213783   | 1.812827393 | -2.301321419 |
| H | 12.403030975  | 0.830829253 | 2.876574718  |
| H | 12.428965993  | 0.799804912 | 1.103706824  |

|   |               |             |              |
|---|---------------|-------------|--------------|
| H | -6.186889300  | 5.926098597 | -1.713058230 |
| H | -8.120355952  | 5.811825629 | -3.271380575 |
| H | -6.096732144  | 4.411281417 | 0.226921425  |
| H | -9.908572408  | 4.167075704 | -2.874473657 |
| H | 10.258395500  | 3.825426619 | 3.644182073  |
| H | 6.840296739   | 6.131164528 | 2.509850807  |
| H | 8.684975799   | 5.659581829 | 4.109325142  |
| H | 6.623362110   | 4.771463642 | 0.470395255  |
| H | -13.705131045 | 3.523696534 | -1.920643466 |
| H | -4.972651313  | 3.286546296 | 3.418185160  |
| H | -7.298423683  | 4.405576762 | 5.074257282  |
| H | -5.657506715  | 5.051146720 | 5.038054341  |
| H | -6.667291474  | 5.130866425 | 3.592622611  |
| H | -4.757438112  | 2.788211340 | 5.850733580  |
| H | -6.371603665  | 2.080289817 | 5.861235097  |
| H | -5.080360968  | 1.320382119 | 4.923718983  |
| H | -13.833848059 | 2.711814549 | 1.030690934  |
| H | -12.969389486 | 4.117554257 | 0.396060231  |
| H | -14.728916664 | 4.042369731 | 0.291455473  |
| H | -15.852621642 | 2.389688464 | -1.279690006 |
| H | -14.895007808 | 1.404848643 | -2.388382561 |
| H | -14.934799484 | 1.004060054 | -0.673767662 |
| H | 13.957047503  | 2.799553990 | 2.823326351  |
| H | 5.297628201   | 3.876586488 | -2.734126307 |
| H | 14.964773710  | 0.269409064 | 1.407470705  |
| H | 15.990778644  | 1.479103940 | 2.186104473  |
| H | 14.868462120  | 0.518541758 | 3.151002772  |
| H | 13.411522532  | 3.660156741 | 0.537361183  |
| H | 15.143651676  | 3.370855918 | 0.707939531  |
| H | 14.142170233  | 2.218787963 | -0.179420794 |

|   |              |             |              |
|---|--------------|-------------|--------------|
| H | 5.046923379  | 3.520413049 | -5.187202762 |
| H | 6.578174469  | 2.648509067 | -5.229930243 |
| H | 5.208961388  | 1.983650645 | -4.331739584 |
| H | 7.738160774  | 4.823487842 | -4.330408614 |
| H | 6.173656118  | 5.635028599 | -4.264810674 |
| H | 7.177415138  | 5.539139821 | -2.816276501 |
| H | 1.665763707  | 2.892839264 | 1.426801847  |
| H | 0.998866700  | 4.813679462 | 0.127972554  |
| H | -1.302132614 | 5.828305682 | 0.411939509  |
| H | -1.712846427 | 4.571957737 | 1.593527713  |
| H | -0.519422669 | 5.809284415 | 1.988356214  |
| H | 0.037546332  | 2.874521125 | 2.287966923  |

**12re-TS for 2Al/2DIBP/(MgCl<sub>2</sub>)<sub>13</sub>/TiCl<sub>2</sub><sup>i</sup>Bu cluster 6**

Total atom = 180

|    |               |              |              |
|----|---------------|--------------|--------------|
| CL | -10.766164698 | -4.175079438 | 1.747042643  |
| MG | -9.020107668  | -4.192449350 | 0.320955713  |
| CL | -4.716470668  | -4.118745265 | 1.453589464  |
| MG | -2.970229802  | -4.136065927 | 0.027794861  |
| CL | -7.248359359  | -4.209092310 | -1.075166959 |
| CL | -1.230611935  | -4.155961881 | -1.409436936 |
| CL | 1.088532398   | -4.059816554 | 1.303029416  |
| MG | 2.827405522   | -4.079705444 | -0.131336158 |
| CL | 7.135695088   | -4.004239755 | 0.978255335  |
| MG | 8.873924797   | -4.025189560 | -0.454348681 |
| CL | 4.640407729   | -4.096554365 | -1.473809349 |
| CL | 10.591176977  | -4.046367382 | -1.919608046 |
| CL | -13.930385343 | -2.014611786 | 0.292042249  |
| MG | -11.747878363 | -2.190114211 | 0.657608284  |
| CL | -10.187140336 | -2.464320858 | -1.005558773 |

|    |               |              |              |
|----|---------------|--------------|--------------|
| MG | -5.972848898  | -2.375695209 | 0.114182957  |
| CL | -7.927616195  | -2.394376083 | 1.746496178  |
| CL | -4.051322199  | -2.269545351 | -1.391939074 |
| MG | -0.074348437  | -2.220456876 | -0.113039201 |
| CL | -1.988736274  | -2.138942636 | 1.340371786  |
| CL | 1.834846866   | -2.239664964 | -1.585510258 |
| MG | 5.852289148   | -2.239510476 | -0.216342015 |
| MG | 11.807150262  | -2.263520438 | -0.745847380 |
| CL | 3.867887458   | -2.134064947 | 1.221184562  |
| CL | 7.913933847   | -2.097248913 | -1.733187869 |
| CL | 10.067196495  | -2.547563210 | 1.128727228  |
| CL | 13.981599146  | -2.490311455 | -0.317195994 |
| CL | -10.886653750 | -0.382715913 | 1.962799971  |
| MG | -8.939137766  | -0.324267133 | 0.506551248  |
| CL | -5.101417233  | -0.441359706 | 1.387919212  |
| CL | -7.295210150  | -0.684291728 | -1.395420249 |
| MG | -3.215185703  | -0.183009297 | -0.083625169 |
| CL | 0.943117580   | -0.193265727 | 1.177249144  |
| CL | -1.121662122  | -0.191464061 | -1.492113206 |
| MG | 3.018126586   | -0.164048257 | -0.215170425 |
| CL | 7.080431282   | -0.568469535 | 1.462320424  |
| CL | 4.966087560   | -0.402522473 | -1.599733065 |
| MG | 9.035880952   | -0.325534621 | -0.121416336 |
| CL | 11.006748988  | -0.227926852 | -1.625903979 |
| TI | -0.080779022  | 1.847625618  | -0.203069043 |
| CL | -2.271781145  | 1.805876627  | 1.025646088  |
| CL | 1.984431631   | 1.672525145  | -1.522819919 |
| C  | -0.542973486  | 3.700109689  | -1.234977143 |
| C  | -1.763066716  | 4.622305129  | -1.297077974 |
| O  | 10.011201842  | 0.983675912  | 1.119831461  |

|   |               |             |              |
|---|---------------|-------------|--------------|
| C | 10.553781943  | 2.076892506 | 1.025191615  |
| C | 8.306177038   | 2.545293797 | -1.178229223 |
| O | 8.336195344   | 1.335618898 | -1.009146974 |
| O | -9.852273267  | 1.154456925 | -0.582279452 |
| C | -10.174744841 | 2.325318363 | -0.428702461 |
| C | -7.798973795  | 2.356355367 | 1.658710725  |
| O | -8.108565836  | 1.179848330 | 1.534898151  |
| O | 11.830755419  | 2.249884055 | 1.276440082  |
| C | 12.621257485  | 1.089031756 | 1.703022526  |
| O | 7.765393810   | 3.070060350 | -2.254194408 |
| C | 7.165185858   | 2.151271598 | -3.230465969 |
| O | -11.413101572 | 2.737602423 | -0.556479268 |
| O | -7.137162284  | 2.788726769 | 2.706365079  |
| C | -12.442672207 | 1.752059363 | -0.920272702 |
| C | -6.727060852  | 1.818317912 | 3.728576030  |
| C | -1.440876812  | 6.104340016 | -1.068760456 |
| C | -2.444862157  | 4.471389686 | -2.669294960 |
| C | -9.217448355  | 3.455841326 | -0.194555810 |
| C | -8.112998910  | 3.450531681 | 0.688054134  |
| C | -9.444746175  | 4.587432719 | -0.981522379 |
| C | -7.270133405  | 4.565638803 | 0.711629250  |
| C | -7.485697730  | 5.658924168 | -0.112244044 |
| C | -8.584667970  | 5.674591300 | -0.956324409 |
| C | 8.832510294   | 3.578287074 | -0.230645971 |
| C | 9.858049022   | 3.371737448 | 0.723041883  |
| C | 10.271393358  | 4.451605350 | 1.507858439  |
| C | 8.265757440   | 4.852616083 | -0.334491139 |
| C | 8.663369502   | 5.899538622 | 0.481799705  |
| C | 9.675368655   | 5.699136963 | 1.406156456  |
| C | -13.800003115 | 2.428918287 | -0.861169807 |



|    |               |              |              |
|----|---------------|--------------|--------------|
| C  | -5.597192919  | 2.423527703  | 4.542469947  |
| C  | -6.026458656  | 3.685451830  | 5.292992081  |
| C  | -5.057671271  | 1.352434074  | 5.496513820  |
| C  | -14.169778138 | 2.823336590  | 0.570514931  |
| C  | -14.843899788 | 1.486648972  | -1.472343259 |
| C  | 14.068395551  | 1.519527792  | 1.861895452  |
| C  | 6.452897846   | 2.971942912  | -4.289854230 |
| C  | 14.849913779  | 0.375205113  | 2.518337600  |
| C  | 14.689473662  | 1.922657672  | 0.522430644  |
| C  | 5.682367979   | 2.016404659  | -5.207827827 |
| C  | 7.412630399   | 3.864425979  | -5.078959400 |
| CL | -4.428470917  | 1.363281382  | -1.809281664 |
| CL | 4.218215766   | 1.570351951  | 1.375607497  |
| AL | -6.154552140  | 0.612767688  | -3.061701915 |
| AL | 5.795892850   | 0.903879492  | 2.856085275  |
| C  | -7.352886739  | 2.134159178  | -3.423694491 |
| C  | -6.877688069  | 3.066968459  | -4.552474567 |
| C  | -5.607431171  | -0.691329327 | -4.425186882 |
| C  | -4.356591842  | -0.319545431 | -5.241714814 |
| C  | 6.970942497   | 2.447556578  | 3.202586480  |
| C  | 5.080757819   | -0.262112596 | 4.265709931  |
| C  | 3.785299428   | 0.219908500  | 4.942979221  |
| C  | 6.363436082   | 3.513411799  | 4.132827575  |
| C  | 0.751954924   | 2.993766171  | 1.527867468  |
| C  | 0.468287848   | 4.131738465  | 0.785200532  |
| C  | 1.592817780   | 4.971050410  | 0.242102973  |
| H  | 0.286755456   | 4.090331106  | -1.823667648 |
| H  | -0.846494046  | 2.749708919  | -1.762699250 |
| H  | -2.478810936  | 4.296791968  | -0.536257568 |
| H  | -2.349335617  | 6.700735513  | -1.175786049 |

|   |               |             |              |
|---|---------------|-------------|--------------|
| H | -1.033683334  | 6.314494407 | -0.080148781 |
| H | -0.724806106  | 6.466943315 | -1.811643339 |
| H | -3.334934749  | 5.102967065 | -2.724854766 |
| H | -1.768196679  | 4.774706041 | -3.472936919 |
| H | -2.755554097  | 3.443441069 | -2.851882065 |
| H | -7.608667405  | 1.610854947 | 4.338974386  |
| H | -6.415666276  | 0.908776972 | 3.223942180  |
| H | -12.202856652 | 1.394449802 | -1.922096798 |
| H | -12.378714657 | 0.922418054 | -0.219491260 |
| H | 7.973565904   | 1.550568796 | -3.651504903 |
| H | 6.483261017   | 1.494614515 | -2.694909846 |
| H | 12.190538575  | 0.729109072 | 2.637712962  |
| H | 12.518886818  | 0.317009532 | 0.943424175  |
| H | -6.801123353  | 6.496231939 | -0.083938594 |
| H | -8.776273490  | 6.525416263 | -1.596760588 |
| H | -6.429921616  | 4.563622533 | 1.388568296  |
| H | -10.302042443 | 4.599146634 | -1.637925822 |
| H | 11.067472155  | 4.298730608 | 2.220798285  |
| H | 8.186318500   | 6.865986378 | 0.386933019  |
| H | 10.005843872  | 6.505920694 | 2.046988533  |
| H | 7.492274025   | 5.014159555 | -1.068993130 |
| H | -13.746717320 | 3.334780456 | -1.475806220 |
| H | -4.798132586  | 2.681024903 | 3.839364098  |
| H | -6.810895718  | 3.457597935 | 6.020359521  |
| H | -5.183530073  | 4.113391486 | 5.838605795  |
| H | -6.409310542  | 4.449750363 | 4.615231726  |
| H | -4.222145731  | 1.747277408 | 6.076220662  |
| H | -5.826864786  | 1.028219502 | 6.202884521  |
| H | -4.704367723  | 0.475586524 | 4.951998757  |
| H | -14.249341382 | 1.935922293 | 1.202901825  |

|   |               |              |              |
|---|---------------|--------------|--------------|
| H | -13.426418653 | 3.489889210  | 1.010571185  |
| H | -15.132893402 | 3.336265671  | 0.589636859  |
| H | -15.832987852 | 1.945616387  | -1.432792861 |
| H | -14.620015212 | 1.264684086  | -2.518193902 |
| H | -14.886420536 | 0.539901841  | -0.929718152 |
| H | 14.084069192  | 2.383350231  | 2.536271827  |
| H | 5.724045748   | 3.606473047  | -3.773721713 |
| H | 14.828423477  | -0.521913874 | 1.895623946  |
| H | 15.893332181  | 0.662989464  | 2.655275045  |
| H | 14.442591054  | 0.119886515  | 3.499265014  |
| H | 14.126174324  | 2.722661799  | 0.039853859  |
| H | 15.712943838  | 2.273051122  | 0.666782700  |
| H | 14.721019544  | 1.067235940  | -0.156390658 |
| H | 5.128112477   | 2.578569087  | -5.960796310 |
| H | 6.363152126   | 1.341273710  | -5.733015563 |
| H | 4.971053204   | 1.408219977  | -4.647426199 |
| H | 8.145115350   | 3.260926535  | -5.622252731 |
| H | 6.867483260   | 4.462192912  | -5.811639676 |
| H | 7.958239668   | 4.548582158  | -4.427529427 |
| H | -8.341833090  | 1.731439965  | -3.674322978 |
| H | -7.491011779  | 2.712890032  | -2.505538523 |
| H | -7.578540248  | 3.887812523  | -4.735466487 |
| H | -5.909420156  | 3.518564338  | -4.321378156 |
| H | -6.762891109  | 2.531582122  | -5.498406210 |
| H | -5.456718069  | -1.665552439 | -3.953490882 |
| H | -6.462649520  | -0.821995124 | -5.100696494 |
| H | -4.131226815  | -1.070704938 | -6.004280213 |
| H | -4.473293781  | 0.636369183  | -5.760086935 |
| H | -3.474862451  | -0.233581392 | -4.603647401 |
| H | 7.904285733   | 2.070833995  | 3.638394792  |

|   |              |              |              |
|---|--------------|--------------|--------------|
| H | 7.253258479  | 2.911415848  | 2.252707246  |
| H | 4.925575912  | -1.264247939 | 3.858367834  |
| H | 5.871838323  | -0.371060515 | 5.018964873  |
| H | 2.960668971  | 0.275413435  | 4.229639481  |
| H | 3.471803596  | -0.453918786 | 5.745634371  |
| H | 3.897125085  | 1.213783583  | 5.385621023  |
| H | 6.104171632  | 3.097759602  | 5.109901771  |
| H | 7.049996408  | 4.346630064  | 4.313646176  |
| H | 5.447743915  | 3.938208160  | 3.713346776  |
| H | 0.059400546  | 2.659054284  | 2.289046058  |
| H | -0.459263945 | 4.642384057  | 0.999881862  |
| H | 1.779240609  | 2.666739913  | 1.623984411  |
| H | 1.287126943  | 5.644844832  | -0.554063792 |
| H | 1.974156040  | 5.583196982  | 1.065711640  |
| H | 2.411226233  | 4.345804702  | -0.112639830 |

**12si-TS for 2Al/2DIBP/(MgCl<sub>2</sub>)<sub>13</sub>/TiCl<sub>2</sub><sup>i</sup>Bu cluster 6**

Total atom = 180

|    |               |              |              |
|----|---------------|--------------|--------------|
| CL | -10.785822142 | -4.193430936 | 1.646601933  |
| MG | -9.035111000  | -4.186673579 | 0.226180271  |
| CL | -4.735152865  | -4.137502775 | 1.374024866  |
| MG | -2.984254083  | -4.130696966 | -0.046113290 |
| CL | -7.258810340  | -4.179708244 | -1.164204926 |
| CL | -1.239946231  | -4.126217943 | -1.477763810 |
| CL | 1.070367985   | -4.081367917 | 1.243551805  |
| MG | 2.813926569   | -4.076965169 | -0.185232325 |
| CL | 7.118629448   | -4.025681689 | 0.939634775  |
| MG | 8.861525756   | -4.022352034 | -0.487416844 |
| CL | 4.631319030   | -4.071190520 | -1.521832363 |
| CL | 10.583552489  | -4.018596883 | -1.947172395 |

|    |               |              |              |
|----|---------------|--------------|--------------|
| CL | -13.943328060 | -2.004000776 | 0.220609734  |
| MG | -11.762196729 | -2.188175264 | 0.590075017  |
| CL | -10.196243027 | -2.433701644 | -1.072639980 |
| MG | -5.985639847  | -2.369330813 | 0.062267337  |
| CL | -7.945732252  | -2.415672764 | 1.687590370  |
| CL | -4.059110457  | -2.237791387 | -1.435390639 |
| MG | -0.086226363  | -2.215592448 | -0.142780582 |
| CL | -2.005317437  | -2.158583697 | 1.305596819  |
| CL | 1.827795985   | -2.209952522 | -1.609094688 |
| MG | 5.840772510   | -2.238389378 | -0.226977578 |
| MG | 11.797267458  | -2.258467861 | -0.737352787 |
| CL | 3.851776728   | -2.157140975 | 1.205670373  |
| CL | 7.907486090   | -2.070624907 | -1.734240047 |
| CL | 10.050880857  | -2.574748741 | 1.126064065  |
| CL | 13.970082773  | -2.495031952 | -0.305775567 |
| CL | -10.902731364 | -0.403121744 | 1.924865695  |
| MG | -8.943905121  | -0.319568604 | 0.480131346  |
| CL | -5.118909840  | -0.462571097 | 1.379283652  |
| CL | -7.281429958  | -0.622462676 | -1.416680199 |
| MG | -3.214538080  | -0.196263875 | -0.068196656 |
| CL | 0.953016206   | -0.195329215 | 1.202951546  |
| CL | -1.132711068  | -0.213982495 | -1.482004317 |
| MG | 3.003435272   | -0.158023383 | -0.224865278 |
| CL | 7.057805473   | -0.591658278 | 1.477902031  |
| CL | 4.957258343   | -0.384861158 | -1.598636615 |
| MG | 9.023647227   | -0.328023901 | -0.089040187 |
| CL | 11.001980574  | -0.207298511 | -1.583974497 |
| TI | -0.086724409  | 1.825365650  | -0.114158617 |
| CL | -2.235576754  | 1.713346980  | 1.145572228  |
| CL | 1.929584425   | 1.679432947  | -1.520690907 |

|   |               |             |              |
|---|---------------|-------------|--------------|
| C | -0.781154572  | 3.652960939 | -1.191554185 |
| C | -0.106746896  | 4.456544652 | -2.304420613 |
| O | 9.997570084   | 0.956206339 | 1.178803967  |
| C | 10.545045178  | 2.048585934 | 1.104644213  |
| C | 8.306514071   | 2.563576905 | -1.098273541 |
| O | 8.334903200   | 1.350819952 | -0.952675702 |
| O | -9.847570471  | 1.191750044 | -0.573216745 |
| C | -10.190206811 | 2.350610722 | -0.378005917 |
| C | -7.842136911  | 2.328552127 | 1.743312829  |
| O | -8.125155799  | 1.153648512 | 1.559266556  |
| O | 11.821746604  | 2.211907233 | 1.363762034  |
| C | 12.605638190  | 1.040921539 | 1.774243077  |
| O | 7.766833384   | 3.109210251 | -2.164519465 |
| C | 7.163802907   | 2.209771327 | -3.156505165 |
| O | -11.432138027 | 2.750202387 | -0.511760464 |
| O | -7.202379487  | 2.722304001 | 2.819922198  |
| C | -12.439814915 | 1.767513459 | -0.938193773 |
| C | -6.790462871  | 1.708194538 | 3.798317595  |
| C | -0.613847976  | 3.982798990 | -3.676773798 |
| C | -0.321241913  | 5.966808660 | -2.159666896 |
| C | -9.255188570  | 3.485223117 | -0.079627413 |
| C | -8.164792321  | 3.460619890 | 0.820225070  |
| C | -9.489661607  | 4.646225755 | -0.820434163 |
| C | -7.343755896  | 4.588801399 | 0.907599352  |
| C | -7.565306748  | 5.713138140 | 0.128334856  |
| C | -8.649895121  | 5.746004900 | -0.733602335 |
| C | 8.834086024   | 3.577974891 | -0.131564740 |
| C | 9.855978935   | 3.351209656 | 0.821484331  |
| C | 10.270916093  | 4.415892174 | 1.625946192  |
| C | 8.272211759   | 4.855985888 | -0.214878003 |

|    |               |              |              |
|----|---------------|--------------|--------------|
| C  | 8.671195554   | 5.887213454  | 0.620471669  |
| C  | 9.679840571   | 5.667234787  | 1.543991518  |
| C  | -13.807576908 | 2.423232407  | -0.879131143 |
| C  | -5.700368940  | 2.297757708  | 4.675179061  |
| C  | -6.184085403  | 3.505654043  | 5.479528350  |
| C  | -5.157592806  | 1.190877426  | 5.585580395  |
| C  | -14.215120670 | 2.744409349  | 0.560611537  |
| C  | -14.824367759 | 1.497596591  | -1.557698673 |
| C  | 14.053033278  | 1.463768253  | 1.950611468  |
| C  | 6.467072382   | 3.052450483  | -4.209012532 |
| C  | 14.826611628  | 0.305324101  | 2.591503925  |
| C  | 14.684393722  | 1.888979536  | 0.622823025  |
| C  | 5.687826440   | 2.118846679  | -5.141987138 |
| C  | 7.442567000   | 3.941366833  | -4.982716656 |
| CL | -4.360771420  | 1.457905337  | -1.740321984 |
| CL | 4.200038378   | 1.559530869  | 1.376448518  |
| AL | -6.103161222  | 0.761621029  | -3.000733628 |
| AL | 5.757001833   | 0.876264295  | 2.868778125  |
| C  | -7.288974170  | 2.308261671  | -3.287778590 |
| C  | -6.769278328  | 3.326839065  | -4.318536745 |
| C  | -5.568339279  | -0.489507395 | -4.417432894 |
| C  | -4.340467454  | -0.072807138 | -5.246953772 |
| C  | 6.934644553   | 2.411933742  | 3.241146105  |
| C  | 5.027346788   | -0.297546811 | 4.264208487  |
| C  | 3.732296737   | 0.188760051  | 4.939372536  |
| C  | 6.322021209   | 3.470706014  | 4.176200827  |
| C  | 0.781179538   | 3.099747979  | 1.395368781  |
| C  | 0.255479748   | 4.195571484  | 0.671498837  |
| C  | -0.825513479  | 5.041026062  | 1.295243952  |
| H  | -1.743857696  | 4.067847735  | -0.900772604 |

|   |               |             |              |
|---|---------------|-------------|--------------|
| H | -1.032758301  | 2.645082334 | -1.617621724 |
| H | 0.968112155   | 4.255216145 | -2.273646674 |
| H | -0.136516383  | 4.551073471 | -4.478368578 |
| H | -0.392181380  | 2.926610409 | -3.836503643 |
| H | -1.694730481  | 4.118859805 | -3.765463213 |
| H | 0.163204906   | 6.497706121 | -2.981539749 |
| H | -1.386432738  | 6.213206066 | -2.189435594 |
| H | 0.088193414   | 6.364261599 | -1.230176110 |
| H | -7.680765814  | 1.441583841 | 4.371939648  |
| H | -6.439630427  | 0.837295880 | 3.252733939  |
| H | -12.174280459 | 1.455874789 | -1.948875969 |
| H | -12.379114239 | 0.910038048 | -0.271579150 |
| H | 7.968106543   | 1.605945968 | -3.580793701 |
| H | 6.471866196   | 1.553017595 | -2.633891256 |
| H | 12.167531758  | 0.665097885 | 2.699175219  |
| H | 12.506087561  | 0.283421011 | 0.999781038  |
| H | -6.896886081  | 6.560428677 | 0.205042299  |
| H | -8.846291597  | 6.620343155 | -1.340013448 |
| H | -6.515224419  | 4.571999193 | 1.598589455  |
| H | -10.336269823 | 4.671992706 | -1.490121389 |
| H | 11.064119871  | 4.247751971 | 2.338641579  |
| H | 8.197546260   | 6.856727050 | 0.541206812  |
| H | 10.011280742  | 6.461568094 | 2.199708306  |
| H | 7.500920512   | 5.032898850 | -0.948104798 |
| H | -13.752768935 | 3.357573544 | -1.449407924 |
| H | -4.889967851  | 2.613462648 | 4.009706429  |
| H | -6.981783693  | 3.218393251 | 6.170480103  |
| H | -5.368504475  | 3.924642411 | 6.071682916  |
| H | -6.568822429  | 4.295619518 | 4.833004821  |
| H | -4.348082332  | 1.574737506 | 6.208001081  |



|   |               |              |              |
|---|---------------|--------------|--------------|
| H | -5.936192278  | 0.810460399  | 6.252435756  |
| H | -4.767573476  | 0.353262455  | 5.005517570  |
| H | -14.300604398 | 1.826393195  | 1.146740662  |
| H | -13.489142637 | 3.395442699  | 1.050171987  |
| H | -15.183571360 | 3.247163552  | 0.581218510  |
| H | -15.820120226 | 1.942140197  | -1.520731813 |
| H | -14.573383923 | 1.326995816  | -2.607077138 |
| H | -14.867328835 | 0.526908186  | -1.059153137 |
| H | 14.066781932  | 2.315229477  | 2.640579371  |
| H | 5.744824201   | 3.690755163  | -3.688258257 |
| H | 14.806769502  | -0.580237987 | 1.952415385  |
| H | 15.869908479  | 0.587370002  | 2.740785428  |
| H | 14.411758609  | 0.033505690  | 3.564813709  |
| H | 14.126925649  | 2.699479015  | 0.151106693  |
| H | 15.708019687  | 2.233242465  | 0.780270709  |
| H | 14.717625138  | 1.045831714  | -0.071104833 |
| H | 5.147138216   | 2.697512101  | -5.892366210 |
| H | 6.361362185   | 1.438866204  | -5.670218710 |
| H | 4.963870970   | 1.515618444  | -4.592515750 |
| H | 8.168830312   | 3.334608453  | -5.530696802 |
| H | 6.909118166   | 4.556220638  | -5.709869149 |
| H | 7.994873639   | 4.609261488  | -4.320157048 |
| H | -8.267688248  | 1.930406289  | -3.607445409 |
| H | -7.461742734  | 2.812459378  | -2.332360783 |
| H | -7.460873191  | 4.163475644  | -4.460826053 |
| H | -5.809649547  | 3.752749492  | -4.014259504 |
| H | -6.619349043  | 2.869372195  | -5.299809363 |
| H | -5.392777930  | -1.475479913 | -3.979959654 |
| H | -6.435810986  | -0.612573073 | -5.078518220 |
| H | -4.119904776  | -0.795725550 | -6.037732878 |

|   |              |              |              |
|---|--------------|--------------|--------------|
| H | -4.481531035 | 0.897400773  | -5.731698388 |
| H | -3.447441091 | 0.005739299  | -4.623725985 |
| H | 7.862470008  | 2.027502749  | 3.682013455  |
| H | 7.227470044  | 2.884455015  | 2.298883898  |
| H | 4.866995098  | -1.295351365 | 3.848504107  |
| H | 5.814327525  | -0.417605849 | 5.020118575  |
| H | 2.911767497  | 0.257634650  | 4.222542132  |
| H | 3.409551082  | -0.489785163 | 5.734386449  |
| H | 3.850084759  | 1.177652107  | 5.391559077  |
| H | 6.052602222  | 3.046412441  | 5.146798124  |
| H | 7.009706353  | 4.299785459  | 4.371349155  |
| H | 5.411605201  | 3.902613355  | 3.752576049  |
| H | 0.311642803  | 2.829662743  | 2.334952607  |
| H | 0.960124731  | 4.728629536  | 0.046224852  |
| H | 1.841926117  | 2.891801691  | 1.323345198  |
| H | -1.295245212 | 5.725333659  | 0.591712026  |
| H | -1.595022405 | 4.420544222  | 1.752406233  |
| H | -0.364645188 | 5.640508227  | 2.086520939  |

**12re-TS for 2Al/DIBP/(MgCl<sub>2</sub>)<sub>13</sub>/TiCl<sub>2</sub><sup>i</sup>Bu cluster 7**

Total atom = 138

|    |              |              |              |
|----|--------------|--------------|--------------|
| CL | -8.979763213 | -4.511457275 | 1.928758866  |
| MG | -7.226028513 | -4.451625650 | 0.512410713  |
| CL | -2.954268961 | -3.948439808 | 1.659954228  |
| MG | -1.201243972 | -3.889750914 | 0.243844157  |
| CL | -5.447276123 | -4.386367484 | -0.871937765 |
| CL | 0.546825624  | -3.832291616 | -1.182172163 |
| CL | 2.824871220  | -3.398359676 | 1.531875328  |
| MG | 4.571661716  | -3.341838995 | 0.108116000  |
| CL | 8.847682962  | -2.838826474 | 1.231761662  |

|    |               |              |              |
|----|---------------|--------------|--------------|
| MG | 10.593631776  | -2.783443027 | -0.190851179 |
| CL | 6.391337099   | -3.271088607 | -1.223484646 |
| CL | 12.319439742  | -2.731288257 | -1.644785475 |
| CL | -12.304871129 | -2.709041132 | 0.350337098  |
| MG | -10.116583632 | -2.677062505 | 0.733952777  |
| CL | -8.525215358  | -2.901610066 | -0.905978324 |
| MG | -4.343610189  | -2.392299519 | 0.226271984  |
| CL | -6.309384462  | -2.496947334 | 1.849298172  |
| CL | -2.426381745  | -2.196851327 | -1.275258837 |
| MG | 1.521130442   | -1.740844922 | 0.017655539  |
| CL | -0.406231676  | -1.750585637 | 1.456729564  |
| CL | 3.438016560   | -1.670822269 | -1.443471844 |
| MG | 7.428090728   | -1.253812865 | -0.058203512 |
| MG | 13.367812776  | -0.792110319 | -0.558947614 |
| CL | 5.429502232   | -1.247107218 | 1.362864158  |
| CL | 9.483352177   | -1.013347237 | -1.571572207 |
| CL | 11.641902149  | -1.129091979 | 1.319602769  |
| CL | 15.549507998  | -0.808982641 | -0.110134406 |
| CL | -9.426286576  | -0.731169581 | 1.937538145  |
| MG | -7.485793141  | -0.592030104 | 0.478861993  |
| CL | -3.650695411  | -0.324416316 | 1.399260761  |
| CL | -5.788910307  | -0.908882527 | -1.379573409 |
| MG | -1.789604826  | 0.017880804  | -0.084085400 |
| CL | 2.351840021   | 0.432668372  | 1.201373726  |
| CL | 0.325913918   | 0.098492382  | -1.477623128 |
| MG | 4.412020630   | 0.558057422  | -0.184299891 |
| CL | 8.620968613   | 0.790685843  | 1.566949968  |
| CL | 6.491880464   | 0.527832091  | -1.428720759 |
| MG | 10.397611280  | 0.696258124  | -0.050584336 |
| CL | 12.369767650  | 1.325041364  | -1.163901321 |

|     |               |             |              |
|-----|---------------|-------------|--------------|
| TI  | 1.165032644   | 2.298376491 | -0.316222582 |
| CL  | -1.020468261  | 2.138664310 | 0.904530390  |
| CL  | 3.275922348   | 2.224682249 | -1.589563855 |
| CL  | 5.373242885   | 2.364060380 | 1.562944177  |
| AL. | 7.512953838   | 2.969953545 | 1.545529195  |
| C   | 8.020487235   | 3.688906266 | 3.299299879  |
| C   | 8.111347878   | 3.743844559 | -0.173665541 |
| C   | 9.329996418   | 3.099875553 | -0.840466370 |
| C   | 7.337269773   | 5.015956582 | 3.678188616  |
| C   | 0.556336110   | 4.023761915 | -1.479608822 |
| C   | -0.745012603  | 4.815477743 | -1.627517218 |
| O   | -8.518719922  | 0.727767365 | -0.702765233 |
| C   | -8.969493422  | 1.862938227 | -0.619832667 |
| C   | -6.644949727  | 2.249369901 | 1.496379595  |
| O   | -6.800077065  | 1.039739665 | 1.410073673  |
| O   | -10.240739298 | 2.129877543 | -0.799419264 |
| O   | -6.061431541  | 2.795112618 | 2.538062027  |
| C   | -11.145452842 | 1.021686553 | -1.140939680 |
| C   | -5.555657817  | 1.912690941 | 3.596573145  |
| C   | -0.577788004  | 6.332977871 | -1.482478623 |
| C   | -1.364160620  | 4.516774482 | -3.005411045 |
| C   | -8.149164877  | 3.103010075 | -0.420737611 |
| C   | -7.071383890  | 3.261941296 | 0.480927938  |
| C   | -8.487019838  | 4.168379522 | -1.259040345 |
| C   | -6.366994745  | 4.469714121 | 0.475027616  |
| C   | -6.689203423  | 5.497254668 | -0.397225352 |
| C   | -7.760660005  | 5.349312337 | -1.263417681 |
| C   | -12.567142098 | 1.553006688 | -1.170638755 |
| C   | -4.557559969  | 2.689168287 | 4.436737170  |
| C   | -5.191700364  | 3.891443931 | 5.138371706  |

|    |               |              |              |
|----|---------------|--------------|--------------|
| C  | -3.911868401  | 1.724812653  | 5.437639810  |
| C  | -13.040266130 | 1.970619450  | 0.223564810  |
| C  | -13.479729901 | 0.479653310  | -1.775725016 |
| CL | -3.100521980  | 1.351599625  | -1.903761846 |
| AL | -4.761311767  | 0.399403950  | -3.109296041 |
| C  | -6.082164590  | 1.796606451  | -3.537124358 |
| C  | -5.691025103  | 2.705572366  | -4.716482315 |
| C  | -4.099713626  | -0.920336008 | -4.405004521 |
| C  | -2.886334959  | -0.480858713 | -5.244091121 |
| C  | 1.868355349   | 3.629463940  | 1.335045207  |
| C  | 1.483996546   | 4.684922527  | 0.518500344  |
| C  | 2.525782432   | 5.594485174  | -0.073390406 |
| H  | 7.806764286   | 2.934950720  | 4.063981261  |
| H  | 9.109567315   | 3.820508590  | 3.317677355  |
| H  | 7.279109623   | 3.738798222  | -0.881344177 |
| H  | 8.338222198   | 4.798751246  | 0.020313930  |
| H  | 10.183043394  | 3.039780514  | -0.146497072 |
| H  | 9.056447205   | 2.112316990  | -1.243747003 |
| H  | 9.712356805   | 3.654970012  | -1.700022431 |
| H  | 7.554557364   | 5.807942316  | 2.955951559  |
| H  | 6.250909028   | 4.908716211  | 3.722394195  |
| H  | 7.664740747   | 5.378743785  | 4.656322257  |
| H  | 1.358504650   | 4.450684646  | -2.081015048 |
| H  | 0.356878020   | 3.013738010  | -1.943891598 |
| H  | -1.448844144  | 4.464878380  | -0.866809257 |
| H  | -1.536963867  | 6.827158174  | -1.649782149 |
| H  | -0.226310601  | 6.640548350  | -0.498015588 |
| H  | 0.122215744   | 6.722345038  | -2.226929965 |
| H  | -2.310548567  | 5.050448074  | -3.121324155 |
| H  | -0.696206651  | 4.840349453  | -3.808293831 |

|   |               |              |              |
|---|---------------|--------------|--------------|
| H | -1.564949186  | 3.453786876  | -3.133012955 |
| H | -6.420333458  | 1.588627820  | 4.179709149  |
| H | -5.097166407  | 1.049114898  | 3.123689163  |
| H | -10.827653689 | 0.636904647  | -2.110464664 |
| H | -11.025265579 | 0.243266370  | -0.390445673 |
| H | -6.109164946  | 6.410512409  | -0.389394537 |
| H | -8.034951177  | 6.145551316  | -1.942777627 |
| H | -5.549332035  | 4.593768677  | 1.168022377  |
| H | -9.324427994  | 4.053965316  | -1.930941838 |
| H | -12.579409744 | 2.430398966  | -1.827326346 |
| H | -3.774852072  | 3.044307814  | 3.757970998  |
| H | -5.965843547  | 3.567992158  | 5.839987953  |
| H | -4.441447988  | 4.445161075  | 5.705674310  |
| H | -5.649942553  | 4.580474238  | 4.427587520  |
| H | -3.162651640  | 2.244917681  | 6.036161804  |
| H | -4.655895422  | 1.312042126  | 6.124344918  |
| H | -3.419875997  | 0.893608886  | 4.930343898  |
| H | -13.060898636 | 1.107860646  | 0.893540950  |
| H | -12.387822693 | 2.727585791  | 0.661669289  |
| H | -14.049242201 | 2.384022666  | 0.177637987  |
| H | -14.511430579 | 0.833924520  | -1.799532933 |
| H | -13.186766984 | 0.234935600  | -2.799231462 |
| H | -13.449820606 | -0.439790172 | -1.187341582 |
| H | -7.035763769  | 1.301697499  | -3.757760750 |
| H | -6.262714279  | 2.408103633  | -2.647878246 |
| H | -6.457210692  | 3.456694360  | -4.933362868 |
| H | -4.761123333  | 3.245038625  | -4.518925825 |
| H | -5.539271163  | 2.133219741  | -5.635138615 |
| H | -3.862098516  | -1.850411311 | -3.882517377 |
| H | -4.938644118  | -1.163846462 | -5.069469643 |

|   |              |              |              |
|---|--------------|--------------|--------------|
| H | -2.592664621 | -1.247792720 | -5.966606515 |
| H | -3.087901251 | 0.431872230  | -5.811808060 |
| H | -2.017208330 | -0.282011737 | -4.613849955 |
| H | 1.206189829  | 3.282532668  | 2.117480281  |
| H | 0.507738577  | 5.112877789  | 0.694849147  |
| H | 2.921584735  | 3.413021874  | 1.455528898  |
| H | 2.849593184  | 6.281982883  | 0.714434687  |
| H | 3.398129886  | 5.030422344  | -0.401222463 |
| H | 2.158980363  | 6.194208347  | -0.902044343 |

### 12-si-TS for 2Al/DIBP/(MgCl<sub>2</sub>)<sub>13</sub>/TiCl<sub>2</sub><sup>i</sup>Bu cluster 7

Total atom = 138

|    |               |              |              |
|----|---------------|--------------|--------------|
| CL | -8.986723690  | -4.539752348 | 1.789370051  |
| MG | -7.224950579  | -4.451377153 | 0.384536827  |
| CL | -2.959608648  | -3.974130086 | 1.566475058  |
| MG | -1.198542687  | -3.886909154 | 0.161851880  |
| CL | -5.438340228  | -4.358266153 | -0.988055926 |
| CL | 0.557616454   | -3.800715286 | -1.252739133 |
| CL | 2.820371977   | -3.424274162 | 1.482589983  |
| MG | 4.575242058   | -3.339040670 | 0.070232198  |
| CL | 8.844996701   | -2.861527215 | 1.228299135  |
| MG | 10.599005568  | -2.777451764 | -0.182948359 |
| CL | 6.402481354   | -3.241529452 | -1.249271790 |
| CL | 12.333060388  | -2.695957971 | -1.625678222 |
| CL | -12.302174178 | -2.703391797 | 0.229863317  |
| MG | -10.116089804 | -2.680437385 | 0.626463821  |
| CL | -8.515511363  | -2.871647328 | -1.008732385 |
| MG | -4.340270203  | -2.387918505 | 0.157519588  |
| CL | -6.315222078  | -2.525268596 | 1.766861968  |
| CL | -2.414495557  | -2.162348045 | -1.328741163 |

|     |              |              |              |
|-----|--------------|--------------|--------------|
| MG  | 1.525841773  | -1.735073199 | -0.004270807 |
| CL  | -0.409663417 | -1.773760727 | 1.423347793  |
| CL  | 3.451022493  | -1.635661035 | -1.452741913 |
| MG  | 7.433377207  | -1.249366846 | -0.036495522 |
| MG  | 13.375960356 | -0.780241995 | -0.493892206 |
| CL  | 5.426784431  | -1.271251109 | 1.373021568  |
| CL  | 9.497240586  | -0.978516410 | -1.532877705 |
| CL  | 11.639297963 | -1.155325119 | 1.367450731  |
| CL  | 15.555060335 | -0.807455081 | -0.033171636 |
| CL  | -9.429410625 | -0.758487820 | 1.865944239  |
| MG  | -7.474286875 | -0.590003261 | 0.418910422  |
| CL  | -3.659796990 | -0.346236593 | 1.381506079  |
| CL  | -5.759586546 | -0.841825001 | -1.429173809 |
| MG  | -1.769546859 | 0.009217030  | -0.063350889 |
| CL  | 2.368231273  | 0.430124267  | 1.238885554  |
| CL  | 0.335866169  | 0.080760401  | -1.461419887 |
| MG  | 4.412349313  | 0.564270516  | -0.171105343 |
| CL  | 8.605646081  | 0.768998270  | 1.622572619  |
| CL  | 6.502128453  | 0.551817531  | -1.392584537 |
| MG  | 10.401923120 | 0.699743696  | 0.026874067  |
| CL  | 12.382792442 | 1.350192798  | -1.058610651 |
| TI  | 1.179419405  | 2.282485988  | -0.214208861 |
| CL  | -0.954840158 | 2.054753486  | 1.041269928  |
| CL  | 3.244158620  | 2.226722036  | -1.572730988 |
| CL  | 5.350295812  | 2.350063272  | 1.602589991  |
| AL. | 7.489556701  | 2.952185761  | 1.618745654  |
| C   | 7.980066526  | 3.639040240  | 3.390175250  |
| C   | 8.111989135  | 3.750632382  | -0.080317326 |
| C   | 9.339573357  | 3.116878915  | -0.740211724 |
| C   | 7.294708120  | 4.960386292  | 3.784954960  |



|    |               |              |              |
|----|---------------|--------------|--------------|
| C  | 0.349993376   | 3.962362836  | -1.423716216 |
| C  | 0.971636135   | 4.747521007  | -2.579531559 |
| O  | -8.505148648  | 0.766612523  | -0.723930937 |
| C  | -9.003970680  | 1.877111794  | -0.595737857 |
| C  | -6.744227830  | 2.215603498  | 1.603989542  |
| O  | -6.810282719  | 1.010555347  | 1.412705551  |
| O  | -10.276849384 | 2.105286265  | -0.815104758 |
| O  | -6.226366698  | 2.704729419  | 2.707384300  |
| C  | -11.120261847 | 0.986835363  | -1.261153036 |
| C  | -5.695855537  | 1.754359362  | 3.692907426  |
| C  | 0.538017076   | 4.137060462  | -3.922691431 |
| C  | 0.617525376   | 6.237783586  | -2.541694642 |
| C  | -8.247006582  | 3.135484429  | -0.286308773 |
| C  | -7.205756059  | 3.280474000  | 0.660191176  |
| C  | -8.612373508  | 4.242599041  | -1.056530689 |
| C  | -6.567843346  | 4.520004420  | 0.768690183  |
| C  | -6.916003023  | 5.592632260  | -0.036744316 |
| C  | -7.948809522  | 5.455229441  | -0.950171779 |
| C  | -12.555892377 | 1.472426001  | -1.350445908 |
| C  | -4.963512834  | 2.535679275  | 4.768341677  |
| C  | -5.888844643  | 3.482274644  | 5.535152578  |
| C  | -4.269680039  | 1.540175839  | 5.704479323  |
| C  | -13.125300006 | 1.800628096  | 0.031681045  |
| C  | -13.392667426 | 0.402882492  | -2.062476131 |
| CL | -3.012118067  | 1.468927400  | -1.832420410 |
| AL | -4.703649577  | 0.594411395  | -3.051216373 |
| C  | -6.013010840  | 2.032567412  | -3.362855921 |
| C  | -5.573088325  | 3.086134345  | -4.395438647 |
| C  | -4.066397118  | -0.654105143 | -4.426780774 |
| C  | -2.910602508  | -0.143836562 | -5.306079528 |

|   |               |             |              |
|---|---------------|-------------|--------------|
| C | 1.910351688   | 3.726928189 | 1.211468497  |
| C | 1.298043754   | 4.720639191 | 0.411004967  |
| C | 0.134200496   | 5.501401987 | 0.965528062  |
| H | 7.756654082   | 2.871990849 | 4.138909507  |
| H | 9.069097498   | 3.768278741 | 3.422723350  |
| H | 7.289017351   | 3.756917210 | -0.798749326 |
| H | 8.335975947   | 4.802400208 | 0.133224920  |
| H | 10.182957350  | 3.046061041 | -0.035521054 |
| H | 9.071963786   | 2.135410290 | -1.161704491 |
| H | 9.733544258   | 3.685039998 | -1.585885117 |
| H | 7.521759132   | 5.764820741 | 3.079701299  |
| H | 6.207738556   | 4.854590702 | 3.814300868  |
| H | 7.611412458   | 5.304790453 | 4.773260113  |
| H | -0.651820040  | 4.305516472 | -1.174224279 |
| H | 0.199344608   | 2.908820981 | -1.782755884 |
| H | 2.059612755   | 4.648971575 | -2.520017155 |
| H | 0.979755308   | 4.690696732 | -4.754100228 |
| H | 0.857295406   | 3.097104772 | -4.005582266 |
| H | -0.548545439  | 4.167989297 | -4.036955678 |
| H | 1.069673784   | 6.754873495 | -3.390106584 |
| H | -0.464752191  | 6.382187893 | -2.604584381 |
| H | 0.969301560   | 6.732452001 | -1.635574673 |
| H | -6.544159394  | 1.197458975 | 4.095614129  |
| H | -5.037270175  | 1.065968640 | 3.168753972  |
| H | -10.733511461 | 0.659213268 | -2.226585587 |
| H | -11.017971668 | 0.177573223 | -0.541201484 |
| H | -6.385896471  | 6.530947750 | 0.058843099  |
| H | -8.242529692  | 6.284705658 | -1.579820113 |
| H | -5.780342984  | 4.633056286 | 1.497669019  |
| H | -9.421956744  | 4.137715292 | -1.763023112 |

|   |               |              |              |
|---|---------------|--------------|--------------|
| H | -12.560285129 | 2.381684519  | -1.962401061 |
| H | -4.188502663  | 3.126423225  | 4.268004173  |
| H | -6.666824793  | 2.922471064  | 6.061792545  |
| H | -5.327438011  | 4.049455257  | 6.279743036  |
| H | -6.379295993  | 4.195076454  | 4.870910579  |
| H | -3.699735688  | 2.070910207  | 6.468388762  |
| H | -4.999056610  | 0.906574416  | 6.216045048  |
| H | -3.581823310  | 0.891170528  | 5.160138809  |
| H | -13.158830301 | 0.902281827  | 0.652443093  |
| H | -12.524822861 | 2.551183124  | 0.548124664  |
| H | -14.142288981 | 2.187002947  | -0.055256733 |
| H | -14.432389210 | 0.725805790  | -2.134421438 |
| H | -13.029404984 | 0.218290122  | -3.076072018 |
| H | -13.368639562 | -0.542233680 | -1.515991244 |
| H | -6.953823356  | 1.571518713  | -3.687025576 |
| H | -6.235013768  | 2.524921911  | -2.411089731 |
| H | -6.331369068  | 3.861003045  | -4.546858184 |
| H | -4.654988699  | 3.592468367  | -4.086579167 |
| H | -5.378076070  | 2.638151549  | -5.373139378 |
| H | -3.771440013  | -1.591657670 | -3.948291860 |
| H | -4.927746797  | -0.906215692 | -5.058360852 |
| H | -2.625119835  | -0.875672463 | -6.067297468 |
| H | -3.170259253  | 0.779039494  | -5.832313140 |
| H | -2.020018504  | 0.065237332  | -4.709870535 |
| H | 1.457068290   | 3.480517067  | 2.165392564  |
| H | 1.961320757   | 5.273509303  | -0.241614612 |
| H | 2.986302892   | 3.614570153  | 1.159519402  |
| H | -0.384425176  | 6.090948610  | 0.212417045  |
| H | -0.582692400  | 4.844470657  | 1.456128508  |
| H | 0.525757057   | 6.192365700  | 1.718564750  |

### 12re-TS for 2Al/DIBP/(MgCl<sub>2</sub>)<sub>13</sub>/TiCl<sub>2</sub><sup>i</sup>Bu cluster 8

Total atom = 177

|    |               |              |              |
|----|---------------|--------------|--------------|
| CL | -10.511801961 | -4.261009691 | 1.248122857  |
| MG | -8.719813320  | -4.200347846 | -0.119961086 |
| CL | -4.454698956  | -4.216470879 | 1.151275200  |
| MG | -2.664675874  | -4.157150286 | -0.215119059 |
| CL | -6.905479280  | -4.141864442 | -1.456848803 |
| CL | -0.879860994  | -4.096991058 | -1.595377435 |
| CL | 1.351366428   | -4.177508154 | 1.190407141  |
| MG | 3.136213936   | -4.118827901 | -0.187078293 |
| CL | 7.407043719   | -4.131030199 | 1.062581838  |
| MG | 9.189954540   | -4.073636588 | -0.312996069 |
| CL | 4.991378845   | -4.063776665 | -1.469297692 |
| CL | 10.952355308  | -4.016331672 | -1.720570178 |
| CL | -13.621078582 | -2.001344154 | -0.172903069 |
| MG | -11.451679687 | -2.209226253 | 0.249496013  |
| CL | -9.838599757  | -2.390226230 | -1.375965734 |
| MG | -5.662477909  | -2.390651153 | -0.119755856 |
| CL | -7.669804388  | -2.496554045 | 1.446699421  |
| CL | -3.692913580  | -2.201584890 | -1.554061825 |
| MG | 0.240174089   | -2.250303909 | -0.147761112 |
| CL | -1.719601773  | -2.247593343 | 1.245779624  |
| CL | 2.195555447   | -2.189580388 | -1.557641474 |
| MG | 6.167087285   | -2.290641188 | -0.062655715 |
| MG | 12.135926715  | -2.312805460 | -0.402297065 |
| CL | 4.137876167   | -2.263559830 | 1.313591979  |
| CL | 8.277646301   | -2.067945202 | -1.502287168 |
| CL | 10.335719426  | -2.701177191 | 1.394315973  |
| CL | 14.294491451  | -2.575456209 | 0.079817862  |

|    |               |              |              |
|----|---------------|--------------|--------------|
| CL | -10.628926665 | -0.485123629 | 1.685342928  |
| MG | -8.634256618  | -0.350835769 | 0.299958649  |
| CL | -4.829293581  | -0.543828980 | 1.299708005  |
| CL | -6.928039207  | -0.602819356 | -1.565033797 |
| MG | -2.895911433  | -0.206206139 | -0.091025774 |
| CL | 1.223839184   | -0.324800248 | 1.313428681  |
| CL | -0.744101466  | -0.123878932 | -1.417851004 |
| MG | 3.329597676   | -0.209282311 | -0.013837365 |
| CL | 7.466679479   | -0.576062013 | 1.601661063  |
| CL | 5.326941167   | -0.368994140 | -1.345591101 |
| MG | 9.162023202   | -0.116304136 | -0.222573807 |
| CL | 11.409222282  | -0.155078737 | -1.123503441 |
| TI | 0.243290553   | 1.814964660  | 0.052731812  |
| CL | -1.987409643  | 1.693338041  | 1.191718495  |
| CL | 2.364115001   | 1.735949755  | -1.197656459 |
| C  | -0.181176890  | 3.741394517  | -0.850493507 |
| C  | -1.401674444  | 4.664072387  | -0.892336660 |
| O  | -9.503327021  | 1.195358883  | -0.729088968 |
| C  | -9.838202345  | 2.352809690  | -0.512755070 |
| C  | -7.546382002  | 2.250828329  | 1.665417128  |
| O  | -7.837441312  | 1.083739356  | 1.445765699  |
| O  | -11.072264699 | 2.769268719  | -0.664542445 |
| O  | -6.932136201  | 2.611109033  | 2.768077240  |
| C  | -12.080907971 | 1.808075178  | -1.136323421 |
| C  | -6.559031226  | 1.569219386  | 3.732519912  |
| C  | -1.097635825  | 6.124281681  | -0.535663805 |
| C  | -2.023995168  | 4.618576617  | -2.299977188 |
| C  | -8.898280909  | 3.468557656  | -0.163979609 |
| C  | -7.831914005  | 3.408821331  | 0.762497987  |
| C  | -9.101360997  | 4.650298783  | -0.880778878 |

|    |               |              |              |
|----|---------------|--------------|--------------|
| C  | -7.001789494  | 4.525317648  | 0.900098919  |
| C  | -7.191900406  | 5.671736125  | 0.145083442  |
| C  | -8.253046767  | 5.738364802  | -0.743705700 |
| C  | -13.442928763 | 2.476388586  | -1.088113528 |
| C  | -5.503449955  | 2.132542378  | 4.667049791  |
| C  | -6.017994946  | 3.317916998  | 5.485659659  |
| C  | -4.997110557  | 0.999848482  | 5.566581141  |
| C  | -13.875435603 | 2.767674404  | 0.350685039  |
| C  | -14.455158161 | 1.577703654  | -1.808446617 |
| O  | 9.565728684   | 1.792853279  | 0.616956717  |
| O  | 8.498184679   | 1.429091242  | -1.486550249 |
| C  | 7.886350337   | 1.398909981  | -2.793831623 |
| C  | 10.309818222  | 2.108487002  | 1.804513494  |
| SI | 9.026796571   | 2.788272756  | -0.637004164 |
| C  | 10.391851135  | 3.738365985  | -1.514922687 |
| C  | 11.706827352  | 3.938463059  | -0.720619485 |
| C  | 12.673461166  | 4.476696347  | -1.779581293 |
| C  | 12.363782023  | 3.634522613  | -3.028446781 |
| C  | 10.881698378  | 3.186647256  | -2.888076967 |
| C  | 7.607715786   | 3.867766869  | -0.097334630 |
| C  | 8.020729227   | 5.095521836  | 0.782092871  |
| C  | 7.194638527   | 6.298616768  | 0.259252914  |
| C  | 6.093394202   | 5.685935373  | -0.612250497 |
| C  | 6.772864772   | 4.472936735  | -1.256703621 |
| CL | -4.035408026  | 1.450425796  | -1.755548026 |
| CL | 4.504512636   | 1.396656671  | 1.749723184  |
| AL | -5.730621513  | 0.795508027  | -3.103705027 |
| AL | 6.067390920   | 0.607586786  | 3.182799880  |
| C  | 5.417827105   | -0.782781177 | 4.406784482  |
| C  | 7.127957886   | 2.154385979  | 3.790757349  |

|   |               |              |              |
|---|---------------|--------------|--------------|
| C | -5.143458150  | -0.419769035 | -4.530945525 |
| C | -6.907864810  | 2.347400533  | -3.397602709 |
| C | -3.863916757  | -0.003205176 | -5.278387802 |
| C | -6.396728354  | 3.346279362  | -4.451662634 |
| C | 4.028074168   | -0.538868930 | 5.022235129  |
| C | 6.352065180   | 3.114062444  | 4.712743246  |
| C | 1.011651611   | 2.822425083  | 1.896320570  |
| C | 0.742982812   | 4.014756539  | 1.237866957  |
| C | 1.877996361   | 4.903212040  | 0.807019987  |
| H | 0.671031827   | 4.176319125  | -1.372080881 |
| H | -0.459043568  | 2.834067998  | -1.461958631 |
| H | -2.147050099  | 4.278764754  | -0.190360803 |
| H | -2.004127694  | 6.724883976  | -0.635029582 |
| H | -0.734887679  | 6.257510987  | 0.483171095  |
| H | -0.352615486  | 6.545902239  | -1.216286664 |
| H | -2.913800145  | 5.251300522  | -2.344219290 |
| H | -1.315521248  | 4.983914105  | -3.048466621 |
| H | -2.322170062  | 3.607385845  | -2.574220490 |
| H | -7.470706622  | 1.287323607  | 4.263691386  |
| H | -6.187891244  | 0.713657051  | 3.176054096  |
| H | -11.797832566 | 1.519611450  | -2.149104496 |
| H | -12.042070559 | 0.933206545  | -0.490924312 |
| H | -6.517753356  | 6.509875498  | 0.261641673  |
| H | -8.424799947  | 6.630157430  | -1.331908896 |
| H | -6.191949185  | 4.481920721  | 1.611778520  |
| H | -9.930121871  | 4.702421786  | -1.570976343 |
| H | -13.367745465 | 3.423428039  | -1.634603575 |
| H | -4.667834698  | 2.466119731  | 4.042721268  |
| H | -6.842306448  | 3.012411257  | 6.136355860  |
| H | -5.226167435  | 3.718866569  | 6.120947019  |

|   |               |             |              |
|---|---------------|-------------|--------------|
| H | -6.376667730  | 4.126369949 | 4.847090486  |
| H | -4.211875046  | 1.364719394 | 6.230164654  |
| H | -5.801142445  | 0.602723178 | 6.192196310  |
| H | -4.586012318  | 0.177556717 | 4.979125444  |
| H | -13.979519745 | 1.837253727 | 0.913846461  |
| H | -13.153862546 | 3.401147751 | 0.868960975  |
| H | -14.840033039 | 3.277957795 | 0.364570984  |
| H | -15.447139924 | 2.031149483 | -1.779525586 |
| H | -14.185578517 | 1.430269417 | -2.856699941 |
| H | -14.516759233 | 0.595376820 | -1.335345218 |
| H | 8.325183118   | 2.165630758 | -3.430187476 |
| H | 8.073846797   | 0.419569923 | -3.225954397 |
| H | 6.814481951   | 1.545480839 | -2.696533102 |
| H | 11.356116406  | 1.846229263 | 1.654709719  |
| H | 10.225823016  | 3.167239721 | 2.044037387  |
| H | 9.897601934   | 1.528059353 | 2.626580332  |
| H | 9.977678744   | 4.739214780 | -1.689615927 |
| H | 12.074585470  | 2.979266039 | -0.348970189 |
| H | 11.595552594  | 4.608811439 | 0.134148774  |
| H | 12.459305933  | 5.533002479 | -1.965822529 |
| H | 13.717462880  | 4.405337596 | -1.471659171 |
| H | 13.011510176  | 2.757439470 | -3.059487674 |
| H | 12.536643723  | 4.191033352 | -3.949887017 |
| H | 10.821838775  | 2.099777887 | -2.922789031 |
| H | 10.264656035  | 3.570241948 | -3.702058494 |
| H | 6.934703609   | 3.233614816 | 0.487021790  |
| H | 9.088365468   | 5.322344154 | 0.725712994  |
| H | 7.804480993   | 4.889667221 | 1.830624039  |
| H | 6.800908666   | 6.909853087 | 1.071976201  |
| H | 7.826824910   | 6.948636205 | -0.350682753 |



|   |              |              |              |
|---|--------------|--------------|--------------|
| H | 5.691151630  | 6.387622382  | -1.344740703 |
| H | 5.261877633  | 5.344660871  | 0.010162220  |
| H | 7.411606918  | 4.812106462  | -2.080131302 |
| H | 6.061213149  | 3.756515348  | -1.667163635 |
| H | 6.165494092  | -0.860276212 | 5.206877399  |
| H | 5.427849506  | -1.752629435 | 3.904435512  |
| H | 8.008202496  | 1.775452929  | 4.324388173  |
| H | 7.515856533  | 2.709607478  | 2.931538983  |
| H | -5.012468199 | -1.423339596 | -4.118468442 |
| H | -5.975418211 | -0.501744395 | -5.242140013 |
| H | -7.892905306 | 1.970538427  | -3.698626713 |
| H | -7.065382176 | 2.866868558  | -2.447566966 |
| H | -3.959918546 | 0.984126078  | -5.738833652 |
| H | -3.004934505 | 0.038083758  | -4.605721976 |
| H | -3.614000817 | -0.705712162 | -6.078709910 |
| H | -6.262540497 | 2.871705030  | -5.427028382 |
| H | -7.086125597 | 4.183867020  | -4.598419233 |
| H | -5.430971862 | 3.772764601  | -4.168313201 |
| H | 3.250443671  | -0.513511037 | 4.256847862  |
| H | 3.757077059  | -1.325692072 | 5.731847669  |
| H | 3.979136815  | 0.410111891  | 5.563591609  |
| H | 5.981773680  | 2.604748383  | 5.606001071  |
| H | 6.970432423  | 3.948645271  | 5.056913442  |
| H | 5.483688951  | 3.542518371  | 4.206095137  |
| H | 2.038238369  | 2.495536686  | 2.001129213  |
| H | -0.197225536 | 4.499246828  | 1.458406748  |
| H | 0.297731304  | 2.423439966  | 2.604846673  |
| H | 1.595845291  | 5.638645629  | 0.058375846  |
| H | 2.224735574  | 5.447291204  | 1.691377748  |
| H | 2.713092638  | 4.313330781  | 0.431251895  |

### 12si-TS for 2Al/DIBP/(MgCl<sub>2</sub>)<sub>13</sub>/TiCl<sub>2</sub><sup>i</sup>Bu cluster 8

Total atom = 177

|    |               |              |              |
|----|---------------|--------------|--------------|
| CL | -10.473893256 | -4.316151469 | 1.022415283  |
| MG | -8.670023532  | -4.196694551 | -0.326038319 |
| CL | -4.416231493  | -4.263354930 | 0.980931500  |
| MG | -2.614352263  | -4.145311813 | -0.365890241 |
| CL | -6.844085911  | -4.080703847 | -1.643231023 |
| CL | -0.817541989  | -4.025859975 | -1.726615898 |
| CL | 1.389225952   | -4.222081235 | 1.072876681  |
| MG | 3.186039581   | -4.104205635 | -0.285125201 |
| CL | 7.445743809   | -4.166095769 | 1.000518970  |
| MG | 9.240600642   | -4.049576688 | -0.355649907 |
| CL | 5.052325520   | -3.993911178 | -1.547479106 |
| CL | 11.015229420  | -3.931812537 | -1.743953885 |
| CL | -13.572978139 | -2.000793958 | -0.329561543 |
| MG | -11.407156639 | -2.224795990 | 0.102819355  |
| CL | -9.779668489  | -2.336047718 | -1.514527789 |
| MG | -5.614802078  | -2.386436867 | -0.222722845 |
| CL | -7.635630931  | -2.559637716 | 1.320166284  |
| CL | -3.632903422  | -2.135841813 | -1.630348976 |
| MG | 0.287781365   | -2.240998030 | -0.192705911 |
| CL | -1.684155725  | -2.298328590 | 1.182376912  |
| CL | 2.255405027   | -2.119600481 | -1.581473887 |
| MG | 6.213796151   | -2.280803565 | -0.057090815 |
| MG | 12.185377776  | -2.284514001 | -0.344731935 |
| CL | 4.172580299   | -2.313129104 | 1.301138032  |
| CL | 8.336648372   | -1.996184747 | -1.467400762 |
| CL | 10.369868911  | -2.749442219 | 1.417990204  |
| CL | 14.339900712  | -2.565739990 | 0.144907116  |
| CL | -10.595178507 | -0.556783799 | 1.605875704  |

|    |               |              |              |
|----|---------------|--------------|--------------|
| MG | -8.588033377  | -0.369589375 | 0.234340876  |
| CL | -4.806108214  | -0.604041168 | 1.290077999  |
| CL | -6.848125595  | -0.516622868 | -1.606011205 |
| MG | -2.850976204  | -0.223917607 | -0.055058201 |
| CL | 1.268227636   | -0.341546122 | 1.352546302  |
| CL | -0.704324702  | -0.121742605 | -1.393015065 |
| MG | 3.367166639   | -0.195279435 | 0.027757294  |
| CL | 7.520878899   | -0.574423761 | 1.640317480  |
| CL | 5.380483296   | -0.309943952 | -1.283127371 |
| MG | 9.181725944   | -0.035779456 | -0.200269846 |
| CL | 11.472902383  | -0.072324872 | -0.948875423 |
| TI | 0.237964200   | 1.791296250  | 0.127502220  |
| CL | -1.879847877  | 1.519700616  | 1.388409601  |
| CL | 2.373421616   | 1.754926307  | -1.138481145 |
| C  | -0.353155724  | 3.636247841  | -0.760225928 |
| C  | 0.401956728   | 4.575644524  | -1.713038396 |
| O  | -9.462022163  | 1.217807101  | -0.729111903 |
| C  | -9.864000623  | 2.341077677  | -0.454996156 |
| C  | -7.647353207  | 2.172878985  | 1.805573546  |
| O  | -7.822434910  | 1.015573733  | 1.454830104  |
| O  | -11.105748480 | 2.712471517  | -0.656109999 |
| O  | -7.115831900  | 2.460759115  | 2.971542505  |
| C  | -12.034908625 | 1.747951161  | -1.262456865 |
| C  | -6.704097269  | 1.343064069  | 3.830163017  |
| C  | 0.099612944   | 4.215876444  | -3.175937809 |
| C  | 0.084207176   | 6.053638404  | -1.460010371 |
| C  | -9.006274981  | 3.471579590  | 0.033524081  |
| C  | -7.982517515  | 3.391959190  | 1.006235368  |
| C  | -9.249643060  | 4.700394080  | -0.585483057 |
| C  | -7.238240436  | 4.541113709  | 1.290111756  |

|    |               |              |              |
|----|---------------|--------------|--------------|
| C  | -7.466225234  | 5.738922342  | 0.631569850  |
| C  | -8.482465741  | 5.821039500  | -0.306790079 |
| C  | -13.420146106 | 2.368484029  | -1.293174870 |
| C  | -5.928753161  | 1.902952629  | 5.008629168  |
| C  | -6.780217105  | 2.825657439  | 5.882568339  |
| C  | -5.354335338  | 0.731717846  | 5.813051150  |
| C  | -13.986912506 | 2.547782114  | 0.117093053  |
| C  | -14.332787568 | 1.490053369  | -2.157189765 |
| O  | 9.475032139   | 1.913696462  | 0.588595359  |
| O  | 8.499364532   | 1.434059171  | -1.534918439 |
| C  | 8.039915704   | 1.333333118  | -2.899304076 |
| C  | 10.186035837  | 2.298988717  | 1.775655778  |
| SI | 8.852973674   | 2.843181548  | -0.677415327 |
| C  | 10.110688600  | 3.927531538  | -1.553608796 |
| C  | 11.229885572  | 4.535218121  | -0.668434309 |
| C  | 12.241319300  | 5.055288715  | -1.694002820 |
| C  | 12.297561766  | 3.936738810  | -2.743725901 |
| C  | 10.884396016  | 3.293595304  | -2.753302248 |
| C  | 7.295425525   | 3.727252569  | -0.166161119 |
| C  | 7.485528288   | 5.027863085  | 0.667162808  |
| C  | 6.278674627   | 5.944332185  | 0.314136841  |
| C  | 5.399499113   | 5.131216042  | -0.650809402 |
| C  | 6.372148400   | 4.160433903  | -1.330550594 |
| CL | -3.913112528  | 1.584616801  | -1.598619370 |
| CL | 4.513215264   | 1.336522129  | 1.850764479  |
| AL | -5.618437947  | 1.035133136  | -2.979072678 |
| AL | 6.102291784   | 0.539031011  | 3.253420075  |
| C  | 5.481815347   | -0.899238636 | 4.435875845  |
| C  | 7.122042692   | 2.098574406  | 3.896782771  |
| C  | -5.025799528  | -0.054771417 | -4.501714481 |

|   |               |              |              |
|---|---------------|--------------|--------------|
| C | -6.792220162  | 2.610380261  | -3.123233997 |
| C | -3.791976166  | 0.472026829  | -5.256509561 |
| C | -6.227631801  | 3.750334174  | -3.990261931 |
| C | 4.095693092   | -0.690715217 | 5.072254595  |
| C | 6.335992169   | 2.985950815  | 4.880767120  |
| C | 1.121302684   | 2.917346012  | 1.900706214  |
| C | 0.619355063   | 4.045233647  | 1.283523835  |
| C | -0.527575678  | 4.804944591  | 1.893719279  |
| H | -1.299948008  | 4.056229162  | -0.427155052 |
| H | -0.662916411  | 2.729288158  | -1.355831459 |
| H | 1.476884386   | 4.428937768  | -1.568561650 |
| H | 0.644836253   | 4.876313492  | -3.854370865 |
| H | 0.394961705   | 3.189391023  | -3.396832900 |
| H | -0.966856354  | 4.316904546  | -3.392859257 |
| H | 0.632862153   | 6.685355830  | -2.161638683 |
| H | -0.982250293  | 6.251015551  | -1.600474246 |
| H | 0.353991833   | 6.376883423  | -0.453644183 |
| H | -7.611886230  | 0.824551118  | 4.144825849  |
| H | -6.100746587  | 0.667494835  | 3.228706678  |
| H | -11.658797871 | 1.525781442  | -2.261554958 |
| H | -12.018957695 | 0.839899029  | -0.663511238 |
| H | -6.856256929  | 6.602739182  | 0.860369162  |
| H | -8.683097432  | 6.750620182  | -0.822919792 |
| H | -6.463988179  | 4.482431726  | 2.039402649  |
| H | -10.045987663 | 4.766046377  | -1.311517055 |
| H | -13.331886209 | 3.351822993  | -1.769109361 |
| H | -5.089714875  | 2.476755438  | 4.600317396  |
| H | -7.619479285  | 2.278878536  | 6.321466631  |
| H | -6.186769018  | 3.234812121  | 6.702150691  |
| H | -7.185928803  | 3.662406532  | 5.312366680  |

|   |               |             |              |
|---|---------------|-------------|--------------|
| H | -4.757463280  | 1.100958591 | 6.648206970  |
| H | -6.152026537  | 0.108724682 | 6.226239695  |
| H | -4.715752025  | 0.097357563 | 5.196284466  |
| H | -14.112209343 | 1.577354365 | 0.602946226  |
| H | -13.333443312 | 3.160457159 | 0.740180815  |
| H | -14.963898928 | 3.032650261 | 0.078206713  |
| H | -15.338424267 | 1.912033634 | -2.190449709 |
| H | -13.966329796 | 1.418890820 | -3.183861991 |
| H | -14.403175888 | 0.478786984 | -1.751161429 |
| H | 8.176812470   | 2.283154064 | -3.414388558 |
| H | 8.626946249   | 0.566754414 | -3.400345302 |
| H | 6.990266506   | 1.053481984 | -2.898007058 |
| H | 11.249695895  | 2.113940351 | 1.631356788  |
| H | 10.020455402  | 3.350949005 | 2.002566442  |
| H | 9.816970176   | 1.698150128 | 2.603432505  |
| H | 9.531842253   | 4.775092896 | -1.941716548 |
| H | 11.705032013  | 3.761226659 | -0.061241128 |
| H | 10.866611488  | 5.310961345 | 0.008283513  |
| H | 11.867598574  | 5.982378476 | -2.138644101 |
| H | 13.215763661  | 5.272906269 | -1.254260289 |
| H | 13.038048244  | 3.190429168 | -2.450665286 |
| H | 12.588166565  | 4.304822377 | -3.727938965 |
| H | 10.966732041  | 2.211751073 | -2.659599855 |
| H | 10.360097763  | 3.492591674 | -3.688944139 |
| H | 6.725833690   | 3.011635135 | 0.436094362  |
| H | 8.418830989   | 5.538509995 | 0.417969115  |
| H | 7.527788099   | 4.803253987 | 1.733318433  |
| H | 5.731234988   | 6.253629844 | 1.204841179  |
| H | 6.631914827   | 6.855891903 | -0.172043803 |
| H | 4.861475787   | 5.759466105 | -1.362423306 |

|   |              |              |              |
|---|--------------|--------------|--------------|
| H | 4.657766248  | 4.551814900  | -0.096498361 |
| H | 6.935257711  | 4.687087602  | -2.109844738 |
| H | 5.864194361  | 3.316753031  | -1.797836470 |
| H | 6.238274503  | -0.996272235 | 5.225451168  |
| H | 5.496823865  | -1.851288142 | 3.900520814  |
| H | 8.033731318  | 1.736463104  | 4.387424817  |
| H | 7.457737235  | 2.705221776  | 3.050172804  |
| H | -4.832763966 | -1.074440282 | -4.158493792 |
| H | -5.875202354 | -0.134065438 | -5.192097570 |
| H | -7.755100259 | 2.281032598  | -3.532106543 |
| H | -7.008458924 | 2.988487552  | -2.119443962 |
| H | -3.949426643 | 1.480551191  | -5.649143072 |
| H | -2.915691529 | 0.512951182  | -4.606329440 |
| H | -3.533413886 | -0.164986838 | -6.107321664 |
| H | -6.033647896 | 3.422009501  | -5.014560819 |
| H | -6.912867914 | 4.601650044  | -4.054232784 |
| H | -5.283032092 | 4.128733486  | -3.591184472 |
| H | 3.310885173  | -0.644778462 | 4.315178879  |
| H | 3.838523956  | -1.505089785 | 5.755451292  |
| H | 4.043411410  | 0.237722426  | 5.647787638  |
| H | 6.016046887  | 2.425378537  | 5.762672335  |
| H | 6.929708549  | 3.831851272  | 5.240137978  |
| H | 5.435082826  | 3.396948102  | 4.418437938  |
| H | 2.158322432  | 2.642295248  | 1.767455943  |
| H | 1.300816588  | 4.617875420  | 0.669215232  |
| H | 0.605909824  | 2.494750011  | 2.754281431  |
| H | -1.023414348 | 5.475771140  | 1.196170683  |
| H | -1.265895817 | 4.128997598  | 2.322163505  |
| H | -0.120098602 | 5.415646896  | 2.705604154  |

**DIBP/DCPDMS/(MgCl<sub>2</sub>)<sub>13</sub>/TiCl<sub>2</sub>iBu**

Total atom = 136

|    |               |              |              |
|----|---------------|--------------|--------------|
| CL | -10.598079191 | -3.674954509 | 1.891122470  |
| MG | -8.828219039  | -3.865738142 | 0.506512230  |
| CL | -4.543847527  | -3.630584811 | 1.689081389  |
| MG | -2.775254970  | -3.821869872 | 0.306080040  |
| CL | -7.034571904  | -4.052096660 | -0.847538239 |
| CL | -1.012236172  | -4.015847443 | -1.089186323 |
| CL | 1.262159706   | -3.566956384 | 1.625794492  |
| MG | 3.024529215   | -3.761372457 | 0.232726761  |
| CL | 7.314196809   | -3.526770666 | 1.393223106  |
| MG | 9.075121649   | -3.721859176 | 0.002233077  |
| CL | 4.859223006   | -3.940566744 | -1.067093475 |
| CL | 10.816062702  | -3.922097779 | -1.420411432 |
| CL | -13.743189455 | -1.730711569 | 0.123344849  |
| MG | -11.565670181 | -1.849601221 | 0.541675579  |
| CL | -9.977474693  | -2.325409667 | -1.047357596 |
| MG | -5.782303850  | -2.078374640 | 0.118819591  |
| CL | -7.764554165  | -1.895970752 | 1.710011705  |
| CL | -3.836530784  | -2.154595893 | -1.357400368 |
| MG | 0.118266490   | -1.927004163 | -0.030918977 |
| CL | -1.819301927  | -1.670089359 | 1.368994176  |
| CL | 2.051672882   | -2.124739933 | -1.458524574 |
| MG | 6.045814416   | -1.932939386 | -0.036548309 |
| MG | 12.009620579  | -1.999290762 | -0.462640473 |
| CL | 4.038410148   | -1.654991415 | 1.343597061  |
| CL | 8.132607881   | -1.976372715 | -1.526379200 |
| CL | 10.239341054  | -2.050551323 | 1.403504761  |



|    |               |              |              |
|----|---------------|--------------|--------------|
| CL | 14.176841963  | -2.160150733 | 0.025244943  |
| CL | -10.663218763 | 0.140259922  | 1.505896124  |
| MG | -8.723317636  | -0.089594909 | -0.003232711 |
| CL | -4.881667355  | 0.024888296  | 1.262564606  |
| CL | -6.876488742  | -0.523658666 | -1.497239793 |
| MG | -2.997033956  | -0.085188525 | -0.120275119 |
| CL | 1.165146470   | 0.340631675  | 1.006321386  |
| CL | -0.985010438  | -0.113124219 | -1.725088185 |
| MG | 3.151562070   | -0.107926937 | -0.528308009 |
| CL | 7.108506662   | -0.059242735 | 1.272246153  |
| CL | 5.181010142   | -0.220278583 | -1.678634710 |
| MG | 9.126963374   | -0.026986279 | -0.028054597 |
| CL | 11.124965437  | -0.069994239 | -1.508455091 |
| TI | 0.058894520   | 1.948576169  | -0.680364165 |
| CL | -2.153085289  | 2.150777230  | 0.413242507  |
| CL | 2.182680968   | 1.668573203  | -1.913621430 |
| C  | 0.076449362   | 3.992339713  | -1.063681907 |
| C  | 0.826610564   | 4.184334082  | 0.240443803  |
| O  | -9.779482431  | 1.050830108  | -1.366827916 |
| C  | -9.953256220  | 2.226337107  | -1.640548963 |
| C  | -7.617239067  | 2.819000937  | 0.353487997  |
| O  | -8.039639314  | 1.719344419  | 0.672257036  |
| O  | -11.146314077 | 2.729982333  | -1.865382771 |
| O  | -6.958931925  | 3.578993610  | 1.205046653  |
| C  | -12.295778704 | 1.817195760  | -1.752034280 |
| C  | -6.706034745  | 3.033800930  | 2.540490928  |
| C  | 2.236231484   | 4.758447533  | 0.060701234  |
| C  | 0.032649348   | 4.951396416  | 1.303439989  |

|    |               |             |              |
|----|---------------|-------------|--------------|
| C  | -8.854765732  | 3.223721550 | -1.859859486 |
| C  | -7.771109663  | 3.460223907 | -0.988108240 |
| C  | -8.928471410  | 3.935283049 | -3.058213855 |
| C  | -6.795231338  | 4.386666098 | -1.366381851 |
| C  | -6.859320547  | 5.050168377 | -2.581573066 |
| C  | -7.934159839  | 4.828239582 | -3.429327479 |
| C  | -13.574358920 | 2.632773259 | -1.797412478 |
| C  | -5.734954097  | 3.952993953 | 3.259531095  |
| C  | -6.303897161  | 5.358469956 | 3.462717696  |
| C  | -5.342247718  | 3.303847055 | 4.590824839  |
| C  | -13.692398518 | 3.565065804 | -0.589568256 |
| C  | -14.761866399 | 1.666262250 | -1.882894423 |
| O  | 9.976803009   | 1.563185646 | 1.177499228  |
| O  | 8.772303921   | 1.935230796 | -0.866018883 |
| C  | 8.063894883   | 2.322593599 | -2.052691357 |
| C  | 10.508874819  | 1.530311604 | 2.508928071  |
| SI | 9.616370976   | 2.899507434 | 0.220282337  |
| C  | 11.142808809  | 3.734009741 | -0.491550248 |
| C  | 12.526646934  | 3.158151630 | -0.064259108 |
| C  | 13.493856493  | 3.438497275 | -1.248255120 |
| C  | 12.679612531  | 4.233543627 | -2.283002391 |
| C  | 11.231951426  | 3.795987333 | -2.036149470 |
| C  | 8.498079902   | 4.150106136 | 1.043135081  |
| C  | 7.176506859   | 3.639273300 | 1.663875482  |
| C  | 6.798766399   | 4.736738407 | 2.663682604  |
| C  | 8.138835766   | 5.101681896 | 3.312420162  |
| C  | 9.184793159   | 4.992784810 | 2.175839736  |
| H  | 0.648391820   | 4.238401345 | -1.955864646 |

|   |               |             |              |
|---|---------------|-------------|--------------|
| H | -0.918084185  | 4.431514791 | -1.085591010 |
| H | 1.003640432   | 3.160895059 | 0.713072882  |
| H | 2.787671643   | 4.749152238 | 1.003194616  |
| H | 2.803997383   | 4.194720837 | -0.678226042 |
| H | 2.164786509   | 5.793675228 | -0.279422884 |
| H | 0.559124714   | 4.954398051 | 2.259842891  |
| H | -0.095593234  | 5.987664849 | 0.983725014  |
| H | -0.953809924  | 4.516570728 | 1.458462380  |
| H | -7.667031289  | 2.969018325 | 3.054948849  |
| H | -6.301647735  | 2.031564849 | 2.420550294  |
| H | -12.228174543 | 1.111863537 | -2.580744147 |
| H | -12.199617718 | 1.270009332 | -0.815954103 |
| H | -6.076929494  | 5.744969618 | -2.857109413 |
| H | -8.005373992  | 5.348615040 | -4.375454642 |
| H | -5.973016383  | 4.576279483 | -0.693003823 |
| H | -9.774816730  | 3.771724980 | -3.709990879 |
| H | -13.553280371 | 3.240037554 | -2.709521106 |
| H | -4.835913516  | 4.021432419 | 2.637545382  |
| H | -7.196225105  | 5.328576853 | 4.094372584  |
| H | -5.572365628  | 6.003044373 | 3.953648529  |
| H | -6.578596858  | 5.823544942 | 2.515153246  |
| H | -4.615240849  | 3.924141640 | 5.117247452  |
| H | -6.211214985  | 3.186473400 | 5.243786616  |
| H | -4.898443743  | 2.318456017 | 4.439362555  |
| H | -13.718321576 | 2.989879795 | 0.339443170  |
| H | -12.853980057 | 4.261122734 | -0.534382191 |
| H | -14.611264900 | 4.151307870 | -0.646133340 |
| H | -15.700375937 | 2.222785610 | -1.894139937 |

|   |               |             |              |
|---|---------------|-------------|--------------|
| H | -14.720125658 | 1.059346159 | -2.789695867 |
| H | -14.779292727 | 0.982845464 | -1.031322374 |
| H | 7.900735432   | 3.400936498 | -2.070528374 |
| H | 8.642491511   | 2.031118526 | -2.928580550 |
| H | 7.102689366   | 1.812718351 | -2.059270821 |
| H | 11.427284204  | 2.115129957 | 2.566773107  |
| H | 9.775317649   | 1.915457537 | 3.217524062  |
| H | 10.729266879  | 0.494172434 | 2.753740173  |
| H | 11.093422730  | 4.771657400 | -0.139029261 |
| H | 12.470724567  | 2.085993477 | 0.116428930  |
| H | 12.870442595  | 3.625120006 | 0.860442569  |
| H | 14.386330226  | 3.977431992 | -0.928831928 |
| H | 13.829043820  | 2.493934079 | -1.678232181 |
| H | 13.006732396  | 4.049124056 | -3.307470261 |
| H | 12.772265920  | 5.308103471 | -2.099555987 |
| H | 11.070210857  | 2.804992844 | -2.465847851 |
| H | 10.501556248  | 4.477310144 | -2.478558084 |
| H | 8.233226496   | 4.852299487 | 0.240866856  |
| H | 7.323388614   | 2.692426667 | 2.187322765  |
| H | 6.410499497   | 3.457397541 | 0.909361205  |
| H | 6.388963634   | 5.601368496 | 2.131660071  |
| H | 6.051355534   | 4.413561255 | 3.390282138  |
| H | 8.368316388   | 4.381201690 | 4.101562131  |
| H | 8.135813001   | 6.089405583 | 3.775131001  |
| H | 10.109108424  | 4.544994560 | 2.547681724  |
| H | 9.458660037   | 5.977923547 | 1.796522778  |

## DMP

Total atom = 24

|   |              |              |              |
|---|--------------|--------------|--------------|
| C | 0.080360581  | 1.382803695  | 1.997948166  |
| C | -0.080360581 | -1.382803695 | 1.997948166  |
| C | 0.027723899  | 0.700843347  | 0.783151188  |
| C | 0.045122815  | 0.693232766  | 3.201747020  |
| C | -0.045122815 | -0.693232766 | 3.201747020  |
| C | -0.027723899 | -0.700843347 | 0.783151188  |
| C | -0.027723899 | 1.547174560  | -0.448976262 |
| C | 0.027723899  | -1.547174560 | -0.448976262 |
| O | 0.606999087  | 2.560541111  | -0.602176041 |
| O | -0.606999087 | -2.560541111 | -0.602176041 |
| O | 0.931297502  | -1.091493244 | -1.335117238 |
| O | -0.931297502 | 1.091493244  | -1.335117238 |
| C | 1.056762257  | -1.851409673 | -2.547056517 |
| C | -1.056762257 | 1.851409673  | -2.547056517 |
| H | 0.135482631  | 2.462936605  | 1.982404692  |
| H | 0.080596625  | 1.238536885  | 4.136082315  |
| H | -0.080596625 | -1.238536885 | 4.136082315  |
| H | -0.135482631 | -2.462936605 | 1.982404692  |
| H | 0.111262195  | -1.861984566 | -3.088612142 |
| H | 1.350525396  | -2.876624413 | -2.325317209 |
| H | 1.826498020  | -1.350000818 | -3.127092994 |
| H | -0.111262195 | 1.861984566  | -3.088612142 |
| H | -1.350525396 | 2.876624413  | -2.325317209 |
| H | -1.826498020 | 1.350000818  | -3.127092994 |

**Et-DMP-AlEt<sub>2</sub>**

Total atom = 46

|    |              |              |              |
|----|--------------|--------------|--------------|
| C  | -1.146218242 | -3.102528053 | -2.224480405 |
| C  | 1.102534850  | 2.980027228  | 1.524553920  |
| O  | 0.081191039  | -2.519470176 | -1.731292923 |
| O  | 1.377920291  | 2.643015665  | 0.173624115  |
| O  | -1.133221660 | -1.200370756 | -0.443977422 |
| C  | -0.015773669 | -1.570922351 | -0.817617889 |
| C  | 1.632985166  | 0.227577603  | -0.004840176 |
| C  | 1.295288774  | -1.114930419 | -0.300048694 |
| C  | 2.916109166  | 0.455749710  | 0.492286928  |
| C  | 2.225037263  | -2.144629823 | -0.085964873 |
| C  | 3.817217660  | -0.571704849 | 0.736082127  |
| C  | 3.472976739  | -1.884417273 | 0.448971698  |
| C  | 0.737702557  | 1.467692878  | -0.333498481 |
| O  | -0.528962157 | 1.369267041  | 0.162572538  |
| C  | 0.741892903  | 1.663980079  | -1.868829444 |
| AL | -1.634116785 | 0.189032687  | 0.824029323  |
| C  | -0.077103400 | 2.863271917  | -2.332644014 |
| C  | -1.172022506 | -0.549611593 | 2.607894917  |
| C  | -3.532273821 | 0.565057005  | 0.423549908  |
| C  | -2.001841062 | -1.756180657 | 3.082364213  |
| C  | -3.892968696 | 0.961572670  | -1.017415333 |
| H  | -1.757978113 | -2.338761200 | -2.699927323 |
| H  | 0.054973183  | 3.248616211  | 1.664277249  |
| H  | -1.700400596 | -3.558948184 | -1.406473497 |
| H  | 1.349339399  | 2.167105944  | 2.216230927  |
| H  | 3.210734748  | 1.477995404  | 0.672569235  |

|   |              |              |              |
|---|--------------|--------------|--------------|
| H | 1.947574760  | -3.160319330 | -0.329023955 |
| H | 4.794778752  | -0.339856486 | 1.140378441  |
| H | 4.167073307  | -2.694732091 | 0.628552027  |
| H | 0.353618668  | 0.749071581  | -2.326073255 |
| H | 1.780294930  | 1.763017687  | -2.195390884 |
| H | -0.068740395 | 2.928790618  | -3.422796027 |
| H | -1.112461613 | 2.778821237  | -2.003965491 |
| H | 0.332190612  | 3.790022232  | -1.932039753 |
| H | -1.280226634 | 0.263324349  | 3.338361074  |
| H | -0.106095528 | -0.807546110 | 2.638746344  |
| H | -3.867334108 | 1.356844934  | 1.106721820  |
| H | -4.122421108 | -0.313601481 | 0.716256410  |
| H | -3.069205073 | -1.522293287 | 3.117266039  |
| H | -1.716950300 | -2.098437884 | 4.082745068  |
| H | -1.890593462 | -2.614310829 | 2.411770179  |
| H | -3.368946955 | 1.869418037  | -1.325303566 |
| H | -3.617524284 | 0.180143286  | -1.732318315 |
| H | -4.964163314 | 1.148007130  | -1.148294992 |
| H | -0.831697542 | -3.850486944 | -2.945287102 |
| H | 1.730996605  | 3.841131666  | 1.751041242  |

**2DMP/(MgCl<sub>2</sub>)<sub>13</sub>/TiCl<sub>2</sub><sup>i</sup>Bu**

Total atom = 103

|    |              |              |              |
|----|--------------|--------------|--------------|
| CL | 10.845327725 | -3.374349825 | -1.789782291 |
| MG | 9.081835159  | -3.493581415 | -0.389118902 |
| CL | 4.791630159  | -3.381456191 | -1.568470981 |
| MG | 3.029360357  | -3.501356015 | -0.169391288 |
| CL | 7.294433583  | -3.610592054 | 0.980895685  |
| CL | 1.272830994  | -3.623031090 | 1.242070406  |

CL -1.014535266 -3.375950803 -1.487858385  
MG -2.770502945 -3.498235564 -0.078566006  
CL -7.065983110 -3.385311690 -1.235846358  
MG -8.820423626 -3.508252445 0.171463488  
CL -4.599164992 -3.612063865 1.237031418  
CL -10.554742717 -3.634165916 1.610570382  
CL 13.974381912 -1.285843996 -0.163757830  
MG 11.796999113 -1.454865633 -0.565421037  
CL 10.218928633 -1.843372686 1.057104682  
MG 6.017815238 -1.717421146 -0.107037888  
CL 7.993151432 -1.617661100 -1.714058877  
CL 4.077367984 -1.718231750 1.378282095  
MG 0.116267409 -1.619545288 0.054690636  
CL 2.046812175 -1.433610651 -1.366298543  
CL -1.810371859 -1.744874986 1.499179550  
MG -5.810633023 -1.688398158 0.082628160  
MG -11.771965072 -1.790384314 0.534477697  
CL -3.810578536 -1.479452244 -1.320168718  
CL -7.892338557 -1.657123321 1.579888975  
CL -10.006987318 -1.944085912 -1.331077538  
CL -13.938776238 -2.005837550 0.066117758  
CL 10.874275241 0.480614790 -1.623590116  
MG 8.917493315 0.297705838 -0.172126946  
CL 5.092884058 0.313725139 -1.363731199  
CL 7.113581946 -0.071102871 1.410596669  
MG 3.206717426 0.251526654 0.019518431  
CL -0.949431826 0.560724040 -1.130174823  
CL 1.195884329 0.316713609 1.625454030



|    |               |             |              |
|----|---------------|-------------|--------------|
| MG | -2.940349997  | 0.188975410 | 0.431939107  |
| CL | -6.874789819  | 0.113769028 | -1.325819836 |
| CL | -4.944857185  | 0.132500147 | 1.624357930  |
| MG | -8.913974076  | 0.162281064 | -0.020070040 |
| CL | -10.948335732 | 0.235782917 | 1.432264621  |
| TI | 0.131917738   | 2.290400603 | 0.438397861  |
| CL | 2.359689039   | 2.455816062 | -0.633716874 |
| CL | -1.995039116  | 2.087106548 | 1.676833032  |
| C  | 0.083666903   | 4.359820028 | 0.659839062  |
| C  | -0.647078345  | 4.438080237 | -0.667260679 |
| O  | -9.891700975  | 1.517719980 | -1.243963246 |
| C  | -9.935711198  | 2.718564847 | -1.437707889 |
| C  | -7.805145269  | 2.972828077 | 0.824461603  |
| O  | -8.303921474  | 1.873054986 | 0.986937304  |
| O  | 9.810055896   | 1.708223288 | 1.064573819  |
| C  | 9.630067294   | 2.852537408 | 1.439116283  |
| C  | 7.478150396   | 2.970577355 | -0.811072906 |
| O  | 8.090607420   | 1.950199885 | -1.076307483 |
| O  | -11.063833163 | 3.334289862 | -1.739248840 |
| C  | -12.262317678 | 2.511884837 | -1.784119531 |
| O  | -7.216497559  | 3.615449063 | 1.817876726  |
| C  | -7.138394050  | 2.920402104 | 3.089429604  |
| O  | 10.627470422  | 3.604149356 | 1.870112746  |
| O  | 6.868887802   | 3.671634728 | -1.748942558 |
| C  | 11.948521697  | 2.998134702 | 1.854058135  |
| C  | 6.901097060   | 3.129428226 | -3.094021342 |
| C  | -2.067337469  | 5.003058691 | -0.554170887 |
| C  | 0.153151665   | 5.132631029 | -1.774557974 |

|   |               |             |              |
|---|---------------|-------------|--------------|
| C | 8.306200957   | 3.542525070 | 1.548666860  |
| C | 7.315742853   | 3.571093696 | 0.545653974  |
| C | 8.058482408   | 4.183291481 | 2.763372867  |
| C | 6.109881452   | 4.226126111 | 0.805147341  |
| C | 5.862531105   | 4.816979166 | 2.034700572  |
| C | 6.842143990   | 4.799891289 | 3.016291289  |
| C | -7.776208442  | 3.744991461 | -0.453306752 |
| C | -8.760885657  | 3.647225089 | -1.457797104 |
| C | -8.660206241  | 4.457849681 | -2.589260764 |
| C | -6.722122096  | 4.644511074 | -0.632204820 |
| C | -6.613332671  | 5.411188527 | -1.781756110 |
| C | -7.587891863  | 5.319814158 | -2.764140565 |
| H | -0.506249095  | 4.668009088 | 1.520342312  |
| H | 1.070566574   | 4.816076385 | 0.661564173  |
| H | -0.802478315  | 3.379420336 | -1.061552399 |
| H | -2.602798858  | 4.908462550 | -1.501377624 |
| H | -2.637483098  | 4.490100887 | 0.219321713  |
| H | -2.015887372  | 6.063105116 | -0.296639996 |
| H | -0.358558768  | 5.055235512 | -2.735831278 |
| H | 0.264293057   | 6.191882508 | -1.533396923 |
| H | 1.146940929   | 4.700361875 | -1.882562942 |
| H | 7.932150130   | 3.025607556 | -3.425238920 |
| H | 6.404670348   | 2.162096866 | -3.107872867 |
| H | 11.975574019  | 2.153361667 | 2.539333010  |
| H | 12.189257491  | 2.660793636 | 0.848611193  |
| H | -8.139766482  | 2.675626891 | 3.437010849  |
| H | -6.549918322  | 2.013061482 | 2.974961428  |
| H | -12.165876546 | 1.760546066 | -2.565122191 |

|   |               |             |              |
|---|---------------|-------------|--------------|
| H | -12.410305836 | 2.027169675 | -0.821955770 |
| H | 4.910241321   | 5.296677587 | 2.218524073  |
| H | 6.666741659   | 5.266987276 | 3.976455084  |
| H | 5.357194798   | 4.254855156 | 0.031369092  |
| H | 8.828952107   | 4.183211719 | 3.520940639  |
| H | -9.431017471  | 4.399337713 | -3.344384246 |
| H | -5.774823351  | 6.084404278 | -1.901701946 |
| H | -7.522308577  | 5.919993694 | -3.662113436 |
| H | -5.978694664  | 4.732261268 | 0.145574274  |
| H | -13.067728459 | 3.204239290 | -2.005313537 |
| H | -6.652733074  | 3.621685208 | 3.760327968  |
| H | 12.621042004  | 3.785315431 | 2.178255947  |
| H | 6.367356279   | 3.854762599 | -3.699587460 |

**2Al/2DMP/(MgCl<sub>2</sub>)<sub>13</sub>/TiCl<sub>2</sub><sup>i</sup>Bu**

Total atom = 135

|    |               |              |              |
|----|---------------|--------------|--------------|
| CL | 10.761512121  | -3.657791505 | -2.055207144 |
| MG | 9.027943668   | -3.781077659 | -0.617782736 |
| CL | 4.714142591   | -3.660623835 | -1.709098377 |
| MG | 2.980602481   | -3.783224044 | -0.273810846 |
| CL | 7.268169470   | -3.900767982 | 0.786728557  |
| CL | 1.253652990   | -3.909815448 | 1.174176743  |
| CL | -1.089524049  | -3.650371501 | -1.506866608 |
| MG | -2.815584348  | -3.776320369 | -0.062557183 |
| CL | -7.133948434  | -3.656481691 | -1.129426683 |
| MG | -8.859058416  | -3.783291720 | 0.313976254  |
| CL | -4.616834577  | -3.893674936 | 1.290702106  |
| CL | -10.563693481 | -3.912425143 | 1.787884059  |
| CL | 13.925144480  | -1.576515731 | -0.487619560 |

|    |               |              |              |
|----|---------------|--------------|--------------|
| MG | 11.739087516  | -1.743493109 | -0.845440550 |
| CL | 10.195990927  | -2.134801414 | 0.807969965  |
| MG | 5.971765514   | -2.003294854 | -0.267909389 |
| CL | 7.914483398   | -1.897818882 | -1.914732855 |
| CL | 4.064543215   | -2.006813003 | 1.258749911  |
| MG | 0.074413321   | -1.900674951 | 0.018000449  |
| CL | 1.975329067   | -1.710765078 | -1.442894702 |
| CL | -1.821826054  | -2.029621166 | 1.501632772  |
| MG | -5.851265085  | -1.965395785 | 0.168163015  |
| MG | -11.800447759 | -2.064010443 | 0.744073853  |
| CL | -3.879857156  | -1.752661175 | -1.275048658 |
| CL | -7.900244144  | -1.937632349 | 1.708460036  |
| CL | -10.075352171 | -2.212403173 | -1.159032718 |
| CL | -13.977366153 | -2.276534932 | 0.320016659  |
| CL | 10.842232145  | 0.128660686  | -2.036012709 |
| MG | 8.931566301   | 0.062023158  | -0.522665663 |
| CL | 5.103763112   | -0.000217924 | -1.432580873 |
| CL | 7.274886896   | -0.377117501 | 1.350810972  |
| MG | 3.226509323   | 0.141513733  | 0.051936683  |
| CL | -1.013537460  | 0.256535004  | -1.157328557 |
| CL | 1.177063567   | 0.009106112  | 1.563812207  |
| MG | -3.063170762  | 0.138170176  | 0.311769310  |
| CL | -7.089741622  | -0.181871996 | -1.382647017 |
| CL | -4.996073946  | -0.214214964 | 1.672961303  |
| MG | -9.033500026  | -0.084820654 | 0.245625388  |
| CL | -10.999661879 | -0.085643400 | 1.755816986  |
| TI | 0.104243816   | 1.961889114  | 0.403593519  |
| CL | 2.087189041   | 2.013992178  | -1.054224070 |

|    |               |             |              |
|----|---------------|-------------|--------------|
| CL | -1.920574318  | 1.728725245 | 1.806140882  |
| C  | 0.199208583   | 4.007982650 | 0.745105971  |
| C  | -0.684748921  | 4.229845357 | -0.469225665 |
| O  | -10.017435547 | 1.333952361 | -0.865435555 |
| C  | -10.493432428 | 2.449852592 | -0.716426107 |
| C  | -8.256216379  | 2.690398475 | 1.509425697  |
| O  | -8.309671987  | 1.495025352 | 1.269361032  |
| O  | 9.916976374   | 1.444251914 | 0.639950045  |
| C  | 10.288589440  | 2.606945717 | 0.570901585  |
| C  | 7.921372541   | 2.863158811 | -1.499289608 |
| O  | 8.100611670   | 1.659093098 | -1.405275879 |
| O  | -11.765217589 | 2.703143206 | -0.943660463 |
| C  | -12.618891905 | 1.600824466 | -1.354127594 |
| O  | -7.756204017  | 3.136012039 | 2.642876867  |
| C  | -7.253004580  | 2.145971668 | 3.582053698  |
| O  | 11.547002457  | 2.952843824 | 0.730323978  |
| O  | 7.341347505   | 3.384468425 | -2.559664011 |
| C  | 12.522765156  | 1.897694388 | 0.965450622  |
| C  | 6.903280127   | 2.466612157 | -3.598938212 |
| C  | -2.027067999  | 4.885954832 | -0.130107293 |
| C  | 0.022102993   | 4.950926634 | -1.621764439 |
| C  | 9.392277111   | 3.795554503 | 0.403500479  |
| C  | 8.299443843   | 3.895680432 | -0.487899822 |
| C  | 9.674442119   | 4.873396266 | 1.245677043  |
| C  | 7.525140361   | 5.059461704 | -0.471468215 |
| C  | 7.792321300   | 6.097720435 | 0.406927571  |
| C  | 8.877519920   | 6.007944711 | 1.264131795  |
| C  | -8.705627143  | 3.794104087 | 0.606794433  |

|    |               |              |              |
|----|---------------|--------------|--------------|
| C  | -9.730035391  | 3.689448080  | -0.363160213 |
| C  | -10.075664491 | 4.824312903  | -1.100850236 |
| C  | -8.066944054  | 5.026413124  | 0.774539124  |
| C  | -8.395112959  | 6.128756984  | 0.001116772  |
| C  | -9.408503265  | 6.028776610  | -0.938320702 |
| CL | 4.361746254   | 1.701028169  | 1.779549902  |
| CL | -4.204152877  | 1.959904393  | -1.172962409 |
| AL | 6.095826035   | 0.923621048  | 3.007717611  |
| AL | -5.789301951  | 1.373880517  | -2.681587117 |
| C  | 7.284676035   | 2.447987788  | 3.383035536  |
| C  | 6.764152032   | 3.409499815  | 4.467082185  |
| C  | 5.548627912   | -0.404099498 | 4.346712902  |
| C  | 4.354800509   | -0.002835962 | 5.232022355  |
| C  | -6.968367204  | 2.931617878  | -2.940553974 |
| C  | -5.076715319  | 0.301460502  | -4.164364360 |
| C  | -3.802639167  | 0.850559162  | -4.831750994 |
| C  | -6.383934706  | 4.024299749  | -3.854207846 |
| H  | -0.255195110  | 4.292172560  | 1.692399636  |
| H  | 1.210899399   | 4.396829181  | 0.649606382  |
| H  | -0.971053564  | 3.217085136  | -0.904674882 |
| H  | -2.684332376  | 4.910856357  | -1.000692006 |
| H  | -2.539309313  | 4.348494445  | 0.666521117  |
| H  | -1.852351904  | 5.912626439  | 0.200369569  |
| H  | -0.607583717  | 4.975342607  | -2.513554565 |
| H  | 0.236951192   | 5.981328219  | -1.329232763 |
| H  | 0.962049284   | 4.465393189  | -1.880792061 |
| H  | 7.763204658   | 1.930754117  | -3.995353074 |
| H  | 6.180013068   | 1.765361243  | -3.190627472 |

|   |               |              |              |
|---|---------------|--------------|--------------|
| H | 12.193101909  | 1.263102001  | 1.784538390  |
| H | 12.652225399  | 1.310985598  | 0.060072132  |
| H | -8.063530968  | 1.484601279  | 3.880642529  |
| H | -6.452864773  | 1.571531439  | 3.121709682  |
| H | -12.161135702 | 1.060271192  | -2.179106165 |
| H | -12.782172008 | 0.936538603  | -0.509362210 |
| H | 7.158159552   | 6.974196406  | 0.411076980  |
| H | 9.108126472   | 6.814474595  | 1.947479952  |
| H | 6.696632433   | 5.139961613  | -1.158381407 |
| H | 10.523978271  | 4.805981164  | 1.908831066  |
| H | -10.872893190 | 4.750062247  | -1.825185100 |
| H | -7.863545296  | 7.060509514  | 0.141471475  |
| H | -9.684884263  | 6.881375162  | -1.544398068 |
| H | -7.293613623  | 5.110447231  | 1.522386369  |
| H | 8.262212272   | 2.051426095  | 3.683262090  |
| H | 7.459887546   | 3.003931582  | 2.457332334  |
| H | 7.455571525   | 4.237519699  | 4.653351632  |
| H | 5.804285809   | 3.850488272  | 4.186465967  |
| H | 6.615205375   | 2.900059016  | 5.422445233  |
| H | 5.329493494   | -1.351980458 | 3.848986177  |
| H | 6.425584852   | -0.600277878 | 4.976928042  |
| H | 4.127765315   | -0.769073424 | 5.978844897  |
| H | 4.539966924   | 0.927828058  | 5.775529537  |
| H | 3.450617323   | 0.146328066  | 4.638433137  |
| H | -7.914856679  | 2.571380694  | -3.361918198 |
| H | -7.220920473  | 3.365785948  | -1.968808611 |
| H | -4.895427942  | -0.719543515 | -3.820386816 |
| H | -5.877831517  | 0.221516457  | -4.910610305 |

|   |               |             |              |
|---|---------------|-------------|--------------|
| H | -2.969311823  | 0.891745675 | -4.127544621 |
| H | -3.483856555  | 0.227053847 | -5.672044107 |
| H | -3.945635302  | 1.862431345 | -5.221327678 |
| H | -6.153143736  | 3.638032343 | -4.850162893 |
| H | -7.073102974  | 4.863863402 | -3.990282754 |
| H | -5.456031885  | 4.434984393 | -3.447905783 |
| H | -13.549889564 | 2.067096741 | -1.658777587 |
| H | -6.891757297  | 2.725277002 | 4.425252839  |
| H | 6.457090833   | 3.101929786 | -4.356829051 |
| H | 13.439699302  | 2.418669086 | 1.219369136  |
